# Supplementary material
Source: publisher site journal article supplement (https://www.degruyterbrill.com/publication/isbn/9783110623857/downloadAsset/9783110623857_Digitaler%20Anhang.zip)
Supplement: Supplementary file 1 [file Fehlertyp_I.xlsx]

## Sheet: fehlgeschlagene_TB
syntaktisch Fehlgeschlagene Tracebacks:	mögliche Erklärung	Korpusbelege für mögliche Schemata	Korpus Bezugsperson (B) vs. Kind (C)	Notizen/Gedanken	Fehlertypen I:	Kind
runter von Klo von [REF] Klo failed: runter (add not allowed)	a), b)	*MEC: jetzt stehen hier rechts und links vom Eingang noch (ei)n_paar Bäume . %mor: adv|jetzt v|stehen-PRES&13p adv:loc|hier adv:loc|rechts conj|und adv:loc|links prep|von~det|dem n|Eingang&m&sg adv|noch pro|ein_paar n|Baum&m-pl .	B	die Frage, ob Leo hier bereits zwischen "von" und "vom" phonlogisch unterscheidet wahrscheinlicher wäre die Verwendung des Schemas vom [REF]	ungeeignter Filler/Slot: Es wird ein Schema gefunden, aber der Slot und Filler passen nicht	Leo
und blau auch gar nicht oder [LOC] auch gar nicht blau +oder (add) failed: Filler und Slot passen nicht zusammen "blau" kein passender Filler für den [LOC]-Slot	a)	*MOT: guck mal , das (P)ferd gehört hier auch gar nich(t) hin . %mor: vimp|gucken&IMP&2s adv|mal cm|cm det|das&n&sg&nom&acc n|Pferd&n&sg&nom&acc v|gehören-PRES&3s adv:loc|hier adv|auch adv|gar adv|nicht vpfx|hin . *MOT: ach@o , ich glaub(e) die passen da auch gar nicht rein . %mor: on|ach cm|cm pro:per|ich v|glauben-PRES&1s pro|die v|passen-PRES&13p adv:loc|da adv|auch adv|gar adv|nicht vpfx|rein…	B			Marieke
da muss ich die Nägeln raus da muss ich failed: die Nägeln raus (add not allowed)	a) ("raus" als adv:dir könnte nicht in PRO-Slot von den Korpusbeispielen am Ende) d) s. Notizen	*MOT: jetzt muss ich erst mal die Blätter machen . %mor: adv|jetzt mod|müssen-PRES&13s pro:per|ich adv|erst adv|mal det|die&pl&nom&acc n|Blatt&n&nom&acc-pl vinf|machen-INF . *MOT: da muss ich mal eine Gabel holen . %mor: adv:loc|da mod|müssen-PRES&13s pro:per|ich adv|mal adjm|ein&det&f&nom&acc-e n|Gabel&f&sg&nom&acc vinf|holen-INF *MOT: jetzt muss ich noch einen Brief wegbringen . %mor: adv|jetzt…	B	"da" nicht lokal gemeint hier! Deshalb auch "jetzt" zulässig, und das wäre mit add erlaubt. "raus" als Richtungsadverb kodiert, könnte aber auch genauso gut Verbpartikel sein - Nägel "rausmachen" oder "rausnehmen" dann wäre es PRO-Slot am Ende und nicht DIR "erst" und "erst mal" verhindern außerdem Übereinstimmung mit Zielstruktur.		Marieke
ich möchte das hier mit der Maus ich möchte das [PRO] hier mit der Maus failed: Filler und Slot passen nicht zusammen	a)	*CHI: ise [: ich] mö(ch)t(e) das bau(e)n . %mor: pro:per|ich mod|mögen-KONJ&13s pro|das vinf|bauen-INF . *CHI: +< un(d) ich mö(ch)t(e) das mal(e)n . %mor: conj|und pro:per|ich mod|mögen-KONJ&13s pro|das vinf|malen-INF . *CHI: i(ch) mö(ch)t(e) das fangen . %mor: pro:per|ich mod|mögen-KONJ&13s pro|das vinf|fangen-INF .	C			Marieke
einer ist raus [REF] ist [ATT] / [LOC] einer raus failed: Filler und Slot passen nicht zusammen	a) Schema: [REF]ist [ATT] Schema: [REF] ist [LOC]	[REF] ist [LOC] *MOT: +< oh@o , ein schöner Vogel is(t) da drauf . %mor: on|oh cm|cm adjm|ein&det adj:cp|schön-cp n|Vogel&m&sg cop|sein&PRES&3s adv:loc|da adv:loc|drauf . *CHI: ein Bär (.) is(t) da . %mor: adjm|ein&det&m&sg&nom n|Bär&m&sg&nom cop|sein&PRES&3s adv:loc|da . *MOT: die Wiese is(t) hier unten . %mor: det|die&f&sg&nom&acc n|Wiese&f&sg&nom&acc cop|sein&PRES&3s adv:loc|hier adv:loc|unten…	B, C	NICHT: einer ist [DIR] oder [REF] ist [DIR]		Mariek
ich da auch Erdbeeren ich da auch failed: Filler und Slot passen nicht zusammen	a)	*MOT: dann komm(e) ich da auch besser dran . %mor: dann v|kommen-PRES&1s pro:per|ich adv:loc|da adv|auch adj|gut-cp vpfx|dran . *MOT: da , dreh mal noch ein bisschen mehr , dass ich da auch drankomme . %mor: adv:loc|da cm|cm vimp|drehen&IMP&2s adv|mal adv|noch adjm|ein&det n|bisschen&sg adv|mehr cm|cm conj|dass pro:per|ich adv:loc|da adv|auch dran#v|kommen-PRES&1s	B			Marieke
ich möchte lieber das [REF] möchte lieber [PRO] ich das failed: Filler und Slot passen nicht zusammen "das" ist kein passender Filler für den [PRO]-Slot	a)	*MOT: +" Biene möchte lieber spielen . %mor: n|Biene&f&sg mod|mögen-KONJ&13s adj:cp|lieb-cp vinf|spielen-INF . *MOT: die möchte lieber den Fisch haben xxx xxx Vogel . %mor: pro|die mod|mögen-KONJ&13s adjm|lieb-er det|den n|Fisch&m&sg vinf|haben-INF n|Vogel&m&sg *CHI: ich möcht(e) lieber in das . %mor: pro:per|ich mod|mögen-KONJ&13s adj:cp|lieb-cp prep|in det|das .	B, C			Marieke
nein ich will das hier lieber ich will das [REF] +nein (add) failed: Filler und Slot passen nicht zusammen "hier lieber" kein passender Filler für den [REF]-Slot	a)	*CHI: ich will das Ponypferd . %mor: pro:per|ich mod|wollen-PRES&13s det|das&n&sg&nom&acc n|Ponypferd&n&sg&nom&acc . *CHI: ich will das Ei haben . %mor: pro:per|ich mod|wollen-PRES&13s det|das&n&sg&nom&acc n|Ei&n&sg&nom&acc vinf|haben-INF .	C			Marieke
wieder zu die Windel wieder zu [PRO] die Windel failed: Filler und Slot passen nicht zusammen	a)	*MOT: so passt es jetzt , müssen wir nur das Haus wieder zu machen , ohne Dach funktioniert das ja alles nich(t) .	B			Merit
bei der grün bei der [REF] grün failed: Filler und Slot passen nicht zusammen	a)	*CHI: bei der Treppe . %mor: prep|bei det|der&f&sg&gen&dat n|Treppe&f&sg&gen&dat . *CHI: bei der Lehne . %mor: prep|bei det|der&f&sg&gen&dat n|Lehne&f&sg&gen&dat .	C			Merit
und das eine weint das eine [REF] +und (add) weint failed: Filler und Slot passen nicht zusammen	a)	*CHI: war das ein(e) Kind trotzdem geruts(ch)t . %mor: aux|sein&PAST&13s pro|das adjm|ein&det-e n|Kind&n&sg adv|trotzdem ge#part|rutschen-PASTP2 . *CHI: das eine Teil da . %mor: pro|das adjm|ein&det-e n|Teil&n&sg adv:loc|da .	C	alternativ existiert das Schema: das [REF] [PRO] - hiermit ließe sich die Zielstruktur ableiten		Merit
und was gestreiftes und was [PRO] gestreiftes failed: Filler und Slot passen nicht zusammen	a)	*CHI: und was zu essen . %mor: conj|und pro|was inf|zu vinf|essen-INF . *CHI: und was trinken . %mor: conj|und pro|was vinf|trinken-INF .	C	[ATT] kann nicht abgeleitet werden		Merit
da soll das nicht schlafen da soll das nicht [adv] schlafen failed: Filler und Slot passen nicht zusammen	a)	*MOT: da soll das nich(t) hin , ok@o . %mor: adv:loc|da mod|sollen-PRES&13s pro|das adv|nicht adv|hin cm|cm on|ok . *CHI: da soll das nicht raus . %mor: adv:loc|da mod|sollen-PRES&13s pro|das adv|nicht adv:dir|raus .	B, C	[PRO] kann nicht abgeleitet werden		Merit
da ist ein Loch reingebissen da ist [REF] [LOC] (da ist) ein Loch reingebissen failed: Filler und Slot passen nicht zusammen	a)	*CHI: eine mit da ist ein Sand drauf . %mor: adjm|ein&det-e adv|mit adv:loc|da cop|sein&PRES&3s adjm|ein&det&m&sg&nom n|Sand&m&sg&nom adv:loc|drauf . *CHI: da ist ein S(t)ift drin , oben . %mor: adv:loc|da cop|sein&PRES&3s adjm|ein&det&m&sg&nom n|Stift&m&sg&nom adv:loc|drin cm|cm adv:loc|oben .	C			Merit
guck mal da ist das dreckig guck mal da ist das [REF] dreckig failed: Filler und Slot passen nicht zusammen	a)	*MOT: ah@o , guck mal , da ist das Mädchen . %mor: on|ah cm|cm vimp|gucken&IMP&2s adv|mal cm|cm adv:loc|da cop|sein&PRES&3s det|das&n&sg&nom&acc n|Mädchen&n&sg&nom&acc . *MOT: guck mal , da ist das Pferd , was sich wehgetan hat . %mor: vimp|gucken&IMP&2s adv|mal cm|cm adv:loc|da cop|sein&PRES&3s det|das&n&sg&nom&acc n|Pferd&n&sg&nom&acc cm|cm pro|was pro:refl|sich weh#ge#part|tun-PASTP2 aux|haben…	B			Merit
die sind alle da reingesprungen die sind alle [ATT] da reingesprungen failed: Filler und Slot passen nicht zusammen	a)	*MOT: die sind alle ganz stumpf . %mor: pro|die cop|sein&PRES&13p adjm|all&det-e adv|ganz adj|stumpf . *MOT: die sind alle grün und was ist das da ? %mor: pro|die cop|sein&PRES&13p adjm|all&det-e adj|grün conj|und pro|was cop|sein&PRES&3s pro|das adv:loc|da ?	B	zusätzlich zu dem teilspezifischen Schema mit [ATT]-Slot findet sich auch eins mit [LOC]-Slot		Merit
