# Supplementary material
Source: publisher site journal article supplement (https://www.degruyterbrill.com/publication/isbn/9783110623857/downloadAsset/9783110623857_Digitaler%20Anhang.zip)
Supplement: Supplementary file 1 [file Leo.pdf › Ableitungen_Zieläußerungen/Leo.pdf]

Leo  
 (min. Cp: 2, minScheme: 2)  
 Result

|                                                                                        | Operations | Superimpositions | Substitutes | Additions |
|----------------------------------------------------------------------------------------|------------|------------------|-------------|-----------|
| bobo guckt den büffel an<br>└─ [REF] [PRO] den [REF]<br>-bobo guckt-    Büffel<br>──an | 3          | -                | 2           | 1         |
| runter von klo<br>└─ von [REF]<br>klo<br>── FAILED to trace 'runter' (ADD not allowed) | -          | -                | -           | -         |
| klein waren die<br>└─ [ATT] waren die<br>klein                                         | 1          | 0                | 1           | 0         |
| über die brücke<br>└─ über die brücke                                                  | 0          | 0                | 0           | 0         |

|                                                                  |   |   |   |   |
|------------------------------------------------------------------|---|---|---|---|
| da fließt das wasser<br>└─ da [PRO] [REF]<br>fließt -das wasser- | 2 | 0 | 2 | 0 |
|------------------------------------------------------------------|---|---|---|---|

|                                                                        |   |   |   |   |
|------------------------------------------------------------------------|---|---|---|---|
| hast du umgedreht<br>└─ hast du [PRO]<br>— FAILED to trace 'umgedreht' | - | - | - | - |
|------------------------------------------------------------------------|---|---|---|---|

|                                                                                                                                     |   |   |   |   |
|-------------------------------------------------------------------------------------------------------------------------------------|---|---|---|---|
| die brücke da fließt unten das wasser<br>└─ unten [REF]<br>das wasser<br>— FAILED to trace 'die brücke da fließt' (ADD not allowed) | - | - | - | - |
|-------------------------------------------------------------------------------------------------------------------------------------|---|---|---|---|

|                                                        |   |   |   |   |
|--------------------------------------------------------|---|---|---|---|
| noch was spielen<br>└─ noch was [PRO]<br>(was) spielen | 1 | 1 | 0 | 0 |
|--------------------------------------------------------|---|---|---|---|

|                                                              |   |   |   |   |
|--------------------------------------------------------------|---|---|---|---|
| nach portugal geflogen<br>└─ [LOC] geflogen<br>nach portugal | 1 | 0 | 1 | 0 |
|--------------------------------------------------------------|---|---|---|---|

du bist noch gerade bei der eisenbahn  
 └─ bei der [REF]  
     (der) eisenbahn  
 ── FAILED to trace 'du bist noch gerade' (ADD not  
 allowed)

- - - -

müssen die leute da aussteigen  
 └─ [PRO] die leute da  
     müssen  
 ── FAILED to trace 'aussteigen' (ADD not allowed)

- - - -

die bleiben auf dem bauernhof  
 └─ die [PRO] auf dem bauernhof  
     bleiben

1 0 1 0

nein auch nicht  
 └─ nein auch nicht

0 0 0 0

eine henriette bimmelbahn  
 └─ eine henriette bimmelbahn

0 0 0 0

|                                                                                  |   |   |   |   |
|----------------------------------------------------------------------------------|---|---|---|---|
| die u_bahn auch<br>└─ [REF] auch<br>die u_bahn                                   | 1 | 0 | 1 | 0 |
| und die u_bahn auch<br>└─ und die [REF] auch<br>u_bahn                           | 1 | 0 | 1 | 0 |
| i_c_e kommen nach frankreich<br>└─ [REF] kommen [LOC]<br>i_c_e -nach frankreich- | 2 | 0 | 2 | 0 |
| ein großer leuchtturm<br>└─ ein großer [REF]<br>leuchtturm                       | 1 | 0 | 1 | 0 |
| nacht leuchtet der<br>└─ [REF] leuchtet der<br>nacht                             | 1 | 0 | 1 | 0 |
| und die muscheln<br>└─ und die [REF]<br>muscheln                                 | 1 | 0 | 1 | 0 |

bitte ein gelbes  
└─ ein gelbes  
─ bitte

1

0

0

1

und da auch  
└─ und da auch

0

0

0

0

ja die ampel  
└─ ja die [REF]  
    (die) ampel

1

1

0

0

und der bär  
└─ und der [REF]  
    (der) bär

1

1

0

0

die tiger und ente  
└─ die [REF] conj [REF]  
    Tiger und ente

3

0

3

0

die schläft noch  
└─ [REF] schläft noch  
    die

1

0

1

0

die sitzen noch im baum  
└─ [REF] [PRO] noch im [REF]  
-die sitzen- (im) baum

2

2

0

0

du sollst einsteigen  
└─ du sollst [PRO]  
einsteigen

1

0

1

0

und der aus  
└─ und der [PRO]  
(der) aus

1

1

0

0

auf dem boden  
└─ auf dem boden

0

0

0

0

mit der u\_bahn  
└─ mit der [REF]  
(der) u\_bahn

1

1

0

0

der hält in frankfurt  
└─ [REF] hält in [REF]  
(in) frankfurt  
der (hält)

2

2

0

0

|                                                                              |   |   |   |   |
|------------------------------------------------------------------------------|---|---|---|---|
| auch ein leuchtturm<br>└─ auch ein [REF]<br>(ein) leuchtturm                 | 1 | 1 | 0 | 0 |
| du sollst zum bahnhof<br>└─ [REF] [PRO] zum bahnhof<br>-du sollst-           | 1 | 0 | 1 | 0 |
| und du sollst einsteigen<br>└─ und du [PRO]<br>└─ [PRO] einsteigen<br>sollst | 2 | 0 | 2 | 0 |
| so eine lange<br>└─ so eine [ATT]<br>(eine) lange                            | 1 | 1 | 0 | 0 |
| noch ein hänger<br>└─ noch ein hänger                                        | 0 | 0 | 0 | 0 |
| du sollst wieder einsteigen<br>└─ du sollst [PRO]<br>wieder einsteigen       | 1 | 0 | 1 | 0 |

und wieder einsteigen  
└─ und wieder [PRO]  
    (wieder) einsteigen

|   |   |   |   |
|---|---|---|---|
| 1 | 1 | 0 | 0 |
|---|---|---|---|

und da passiert  
└─ und da [PRO]  
    (da) passiert

|   |   |   |   |
|---|---|---|---|
| 1 | 1 | 0 | 0 |
|---|---|---|---|

mausi das da  
└─ [REF] das da  
    mausi

|   |   |   |   |
|---|---|---|---|
| 1 | 0 | 1 | 0 |
|---|---|---|---|

der wedelt mit dem schwanz  
└─ der [PRO] mit dem schwanz  
    wedelt

|   |   |   |   |
|---|---|---|---|
| 1 | 0 | 1 | 0 |
|---|---|---|---|

parkt der auto  
└─ [PRO] der [REF]  
    parkt    auto

|   |   |   |   |
|---|---|---|---|
| 2 | 0 | 2 | 0 |
|---|---|---|---|

wieder das auto runter  
└─ das auto [DIR]  
    runter  
— wieder

|   |   |   |   |
|---|---|---|---|
| 2 | 0 | 1 | 1 |
|---|---|---|---|

die tiere sind alle ganz müde  
 └─ [REF] sind alle [ATT]  
 -die tiere- -ganz müde-

2

0

2

0

und der hund ist auch ganz müde  
 └─ [REF] ist auch ganz [ATT]  
 -der hund- (ganz) müde  
 — und

3

1

1

1

ich laufe mit barfuß  
 └─ ich laufe mit [REF]  
 barfuß

1

0

1

0

du fährst mit der u\_bahn  
 └─ du [PRO] mit [REF]  
 fährst der u\_bahn

2

0

2

0

an der decke  
 └─ an der [REF]  
 (der) decke

1

1

0

0

da fährt schon ein zug schon ein  
 └─ da fährt schon ein  
 ─ FAILED to trace 'zug schon ein' (ADD not allowed)

- - - -

auf binz auf rügen  
 └─ [prep] binz auf rügen  
 auf (binz)

1 1 0 0

du willst aussteigen  
 └─ du willst [PRO]  
 aussteigen

1 0 1 0

fährt die u\_bahn weiter  
 └─ fährt die [REF] [PRO]  
 └─ [REF] weiter  
 u\_bahn

2 0 2 0

hier ist der bahnhof  
 └─ hier ist der bahnhof

0 0 0 0

und nach eberswalde  
 └─ und nach [REF]  
 eberswalde

1 0 1 0

|                                                                                                                                                                                       |   |   |   |   |
|---------------------------------------------------------------------------------------------------------------------------------------------------------------------------------------|---|---|---|---|
| ich soll hinsetzen<br>└─ ich soll [PRO]<br>hinsetzen                                                                                                                                  | 1 | 0 | 1 | 0 |
| wir fahren noch weiter<br>└─ wir fahren<br>— noch weiter                                                                                                                              | 1 | 0 | 0 | 1 |
| vielleicht kommt noch ein nachzug der in der nacht<br>fährt<br>└─ der in der [REF] [PRO]<br>nacht fährt<br>— FAILED to trace 'vielleicht kommt noch ein<br>nachzug' (ADD not allowed) | - | - | - | - |
| du bist ganz weit oben<br>└─ ganz weit oben<br>— FAILED to trace 'du bist' (ADD not allowed)                                                                                          | - | - | - | - |
| einen für vivien<br>└─ einen für [REF]<br>vivien                                                                                                                                      | 1 | 0 | 1 | 0 |
| und einen für dich<br>└─ einen für [REF]<br>(für) dich<br>— und                                                                                                                       | 2 | 1 | 0 | 1 |

weil du gerade damit selber spielst  
 └─ [conj] du gerade  
   weil (du)  
 ── FAILED to trace 'damit selber spielst' (ADD not  
 allowed)

- - - -

der fährt nach greifswald  
 └─ der fährt nach [REF]  
   greifswald

1 0 1 0

hier auch nicht  
 └─ hier auch [adv]  
   (auch) nicht

1 1 0 0

ist so sehr schnell  
 └─ ist so [ATT]  
   └─ [adv] schnell  
     sehr

2 0 2 0

der fährt nach eberswalde  
 └─ der fährt nach [REF]  
   eberswalde

1 0 1 0

der ist so schnell  
 └─ der ist so [ATT]  
   (so) schnell

1 1 0 0

|                                                                                                           |   |   |   |   |
|-----------------------------------------------------------------------------------------------------------|---|---|---|---|
| bis nach möckern<br>└─ bis nach [REF]<br>(nach) möckern                                                   | 1 | 1 | 0 | 0 |
| bis nach möckern fährt die<br>└─ nach möckern fährt<br>— bis<br>— FAILED to trace 'die' (ADD not allowed) | - | - | - | - |
| der fährt bis nach möckern<br>└─ [REF] fährt bis nach [REF]<br>(nach) möckern<br>der (fährt)              | 2 | 2 | 0 | 0 |
| hier ist möckern<br>└─ hier ist möckern                                                                   | 0 | 0 | 0 | 0 |
| das mit hecken<br>└─ das mit [REF]<br>— FAILED to trace 'hecken'                                          | - | - | - | - |
| der angelt hier<br>└─ der [PRO] hier<br>angelt                                                            | 1 | 0 | 1 | 0 |

|                                                                                          |   |   |   |   |
|------------------------------------------------------------------------------------------|---|---|---|---|
| der wird grün<br>└─ der wird [ATT]<br>grün                                               | 1 | 0 | 1 | 0 |
| sauer auf mich<br>└─ sauer auf [REF]<br>mich                                             | 1 | 0 | 1 | 0 |
| die gertrud die krabbelt<br>└─ die gertrud die [PRO]<br>(die) krabbelt                   | 1 | 1 | 0 | 0 |
| die wolken ganz blau<br>└─ die wolken<br>— FAILED to trace 'ganz blau' (ADD not allowed) | - | - | - | - |
| ein grünes haus malen<br>└─ [REF] malen<br>└─ ein grünes [REF]<br>haus                   | 2 | 0 | 2 | 0 |

|                                                                          |   |   |   |   |
|--------------------------------------------------------------------------|---|---|---|---|
| auch blau teich malen<br>└─ [REF] malen<br>└─ [ATT] teich<br>-auch blau- | 2 | 0 | 2 | 0 |
| und die gondel auch<br>└─ und die [REF] auch<br>gondel                   | 1 | 0 | 1 | 0 |
| du hast zwei<br>└─ du hast zwei                                          | 0 | 0 | 0 | 0 |
| aus dem malbuch<br>└─ aus dem malbuch                                    | 0 | 0 | 0 | 0 |
| und die auch<br>└─ und die auch                                          | 0 | 0 | 0 | 0 |
| noch ein stift<br>└─ noch ein [REF]<br>stift                             | 1 | 0 | 1 | 0 |

|                     |   |   |   |   |
|---------------------|---|---|---|---|
| die fährt nachhause | 1 | 1 | 0 | 0 |
| └─ die fährt [LOC]  |   |   |   |   |
| (fährt) nachhause   |   |   |   |   |

|                                              |   |   |   |   |
|----------------------------------------------|---|---|---|---|
| eisenbahn ist eine grüne eine dampfeisenbahn | 3 | 0 | 3 | 0 |
| └─ [REF] ist eine [ATT] [REF]                |   |   |   |   |
| dampfeisenbahn grüne Eisenbahn               |   |   |   |   |

|                                                    |   |   |   |   |
|----------------------------------------------------|---|---|---|---|
| die kommt gerade da an                             | - | - | - | - |
| └─ die kommt                                       |   |   |   |   |
| — FAILED to trace 'gerade da an' (ADD not allowed) |   |   |   |   |

|                     |   |   |   |   |
|---------------------|---|---|---|---|
| rot ist kaputt      | 1 | 1 | 0 | 0 |
| └─ [REF] ist kaputt |   |   |   |   |
| rot (ist)           |   |   |   |   |

|               |   |   |   |   |
|---------------|---|---|---|---|
| und mama auch | 1 | 0 | 0 | 1 |
| └─ und mama   |   |   |   |   |
| — auch        |   |   |   |   |

eine alte dampfeisenbahn  
└─ eine alte [REF]  
    dampfeisenbahn

1

0

1

0

die kommt gerade an  
└─ [REF] [PRO] [adv] an  
    └─ die kommt [adv]  
        (kommt) gerade

2

1

1

0

noch eine finden  
└─ noch [REF] finden  
    (noch) eine

1

1

0

das signal ist auf gelb  
└─ [REF] ist auf [ATT]  
    -das signal- gelb

2

0

2

0

bobo das alte  
└─ [REF] das [ATT]  
    bobo alte

2

0

2

0

mit ein auto  
└─ mit ein auto

0

0

0

0

|                                                                                                       |   |   |   |   |
|-------------------------------------------------------------------------------------------------------|---|---|---|---|
| swantje und peter<br>└─ swantje und peter                                                             | 0 | 0 | 0 | 0 |
| guck mal hier<br>└─ guck mal hier                                                                     | 0 | 0 | 0 | 0 |
| da auch weg<br>└─ da auch [PRO]<br>weg                                                                | 1 | 0 | 1 | 0 |
| da ist die rennbahn<br>└─ da ist die [REF]<br>rennbahn                                                | 1 | 0 | 1 | 0 |
| schilder sind nicht da<br>└─ [REF] sind nicht<br>schilder<br>— FAILED to trace 'da' (ADD not allowed) | - | - | - | - |
| auf ein rennbahn<br>└─ auf ein [REF]<br>rennbahn                                                      | 1 | 0 | 1 | 0 |

da an der rennbahn  
 └─ [LOC] an der [REF]  
     da (an)     rennbahn

2                   0                   2                   0

und noch eines  
 └─ und noch [adjm]  
     (noch) eines

1                   1                   0                   0

die fährt auf schienen  
 └─ [REF] fährt auf schienen  
     die

1                   0                   1                   0

da kommt rauch raus  
 └─ da kommt rauch raus

0                   0                   0                   0

das ist der kleine jim\_knopf  
 └─ das ist der kleine [REF]  
                     jim\_knopf

1                   0                   1                   0

und die gertrud ist auch klein  
 └─ die gertrud ist [ATT]  
                     -auch klein-  
 — und

2                   0                   1                   1

|                     |   |   |   |   |
|---------------------|---|---|---|---|
| da ist die u_bahn   | 1 | 0 | 1 | 0 |
| └─ da ist die [REF] |   |   |   |   |
| u_bahn              |   |   |   |   |

|                               |   |   |   |   |
|-------------------------------|---|---|---|---|
| ja die fahren rückwärts       | 1 | 0 | 1 | 0 |
| └─ [co] [REF] [PRO] rückwärts |   |   |   |   |
| -ja die fahren-               |   |   |   |   |

|                         |   |  |   |   |
|-------------------------|---|--|---|---|
| im eimer war der ball   | 3 |  | 3 | 0 |
| └─ im [REF] [PRO] [REF] |   |  |   |   |
| Eimer                   |   |  |   |   |
| └─ [PRO] der Ball       |   |  |   |   |
| war                     |   |  |   |   |

|                      |   |   |   |   |
|----------------------|---|---|---|---|
| ein anderes bärchen  | 1 | 0 | 1 | 0 |
| └─ ein anderes [REF] |   |   |   |   |
| bärchen              |   |   |   |   |

|                               |   |   |   |   |
|-------------------------------|---|---|---|---|
| rumpumpel gehen die türen auf | - | - | - | - |
| └─ die türen [PRO]            |   |   |   |   |
| auf                           |   |   |   |   |

— FAILED to trace 'rumpumpel gehen' (ADD not allowed)

die soll ein\_bisschen was kriegen

└─ ein\_bisschen was [PRO]

kriegen

— FAILED to trace 'die soll' (ADD not allowed)

-

-

-

-
