# Supplementary material
Source: publisher site journal article supplement (https://www.degruyterbrill.com/publication/isbn/9783110623857/downloadAsset/9783110623857_Digitaler%20Anhang.zip)
Supplement: Supplementary file 2 [file Fehlertyp_II.xlsx]

## Sheet: fehlgeschlagene_TB
syntaktisch Fehlgeschlagene Tracebacks:	mögliche Erklärung	Korpusbelege für mögliche Schemata	Korpus Bezugsperson (B) vs. Kind (C)	Notizen/Gedanken	Fehlertypen:	Kind
da fährt schon ein Zug schon ein da fährt schon ein [REF] schon ein (ein) Zug failed: Frequenzkriterium wird nicht erreicht	b)	*CHI: xxx jetzt xxx da fährt schon ein Güterzug schon ein . %mor: adv|jetzt adv:loc|da v|fahren-PRES&3s adv|schon adjm|ein&det&m&sg&nom n|Güterzug&m&sg&nom adv|schon vpfx|ein .	C	teilspezifisches Schema vorhanden: da fährt schon ein [REF]ein Problem ist das zweite schon, auch das findet sich aber in einer Äußerung	b) Frequenzkriterium wird nicht erreicht für Ableiten eines Schemas oder für die Berücksichtigung eines fixed-Strings	Leo
du bist ganz weit oben du bist ganz weit oben failed: Frequenzkriterium wird nicht erreicht	b)	*CHI: du bist ganz weit oben . [+ diary] %mor: pro:per|du cop|sein&PRES&2s adv|ganz adj|weit adv:loc|oben . *CHI: ganz weit oben ! [+ diary] %mor: adv|ganz adj|weit adv:loc|oben !	C			Leo
bis nach Möckern fährt die bis nach Möckern fährt die failed: Frequenzkriterium wird nicht erreicht	b)	*MEC: nach Möckern fährt die , hm ! %mor: prep|nach n:prop|Möckern v|fahren-PRES&3s pro|die cm|cm co|hm !	B			Leo
Schilder sind nicht da [REF] sind nicht da Schilder failed: Frequenzkriterium wird nicht erreicht	b)	*CHI: Tiere sind nicht da ! [+ diary] %mor: n|Tier&n-pl cop|sein&PRES&13p adv|nicht adv:loc|da !	C			Leo
rumpumpel@o gehen die Türen auf [on] [PRO] die Türen [PRO] failed: Frequenzkriterium wird nicht erreicht	b)	*CHI: quak@o [x 3] machen die Frösche . %mor: on|quak vinf|machen-INF det|die&pl&nom&acc n|Frosch&m&nom&acc-pl . *MEC: die Tiere specken [//] spucken die Erdbeeren aus ? %mor: det|die&pl&nom&acc n|Tier&n&nom&acc-pl vinf|spucken-INF det|die&pl&nom&acc n|Erdbeere&f&nom&acc-pl vpfx|aus ?	B, C	Verbpartikel am Ende - die Frage, ob das schon als Klammer beherrscht wird oder noch als separater Slot angesehen wird?		Leo
die soll ein_bisschen was kriegen [REF] soll [adv] [REF] [PRO] die ein_bisschen was kriegen failed: Frequenzkriterium wird nicht erreicht	b)	*VAT: die Regionalbahn soll auch Gleise haben ? %mor: det|die&f&sg&nom&acc n|Regionalbahn&f&sg&nom&acc mod|sollen-PRES&13s adv|auch n|Gleis&n-pl v|haben-PRES&13p ? *MUT: die Giraffe soll auch mithelfen ? %mor: det|die&f&sg&nom&acc n|Giraffe&f&sg&nom&acc mod|sollen-PRES&13s adv|auch mit#vinf|helfen-INF ? *MEC: und der Löwe soll auch mitfliegen ? %mor: conj|und det|der&m&sg&nom n|Löwe&m&sg&nom mod|…	B	man kann stark vermuten, dass folgendes Schema abgeleitet werden könnte: [REF] soll [adv] [REF] [PRO] - hierfür spricht z.B. das Beispiel des *VAT auch: [REF] soll auch [PRO] - ergibt sich aus den Daten, da allerdings keine Type-Frequency, kann der adv-Slot nicht abstrakt werden		Leo
nein ich muss das hier wieder aufbauen ich muss das hier [adv] [PRO] wieder aufbauen +nein (add) failed: Das Frequenzkriterium wird nicht erreicht, um den [adv] und [PRO]-Slot abzuleiten	b)	*MOT: ich muss das hier irgendwie festmachen . %mor: pro:per|ich mod|müssen-PRES&13s pro|das adv:loc|hier pro|irgendwie fest#vinf|machen-INF .	B			Marieke
ich möchte eine rausnehmen ich möchte eine [PRO] rausnehmen failed: Das Frequenzkriterium wird nicht erreicht, um den [PRO]-Slot abzuleiten	b)	*CHI: ich möchte eine Karte aussuchen . %mor: pro:per|ich mod|mögen-KONJ&13s adjm|ein&det&f&nom&acc-e n|Karte&f&sg&nom&acc aus#vinf|suchen-INF .	C			Marieke
das halte ich mal hier hin das [PRO] ich mal [LOC] [PRO] halte hier hin failed: Das Frequenzkriterium wird nicht erreicht	b)	*CHI: hier ist ein Pflaster , das mach(e) i(ch) mal da drum . %mor: adv:loc|hier cop|sein&PRES&3s adjm|ein&det&n&sg&nom n|Pflaster&n&sg&nom&acc cm|cm pro|das v|machen-PRES&1s pro:per|ich adv|mal adv:loc|da vpfx|drum .	C	Die Frage, ob es tatsächlich einen eigenen Slot für die Verbpartikel am Ende gibt, wenn nicht, wäre die Konstruktion ableitbar gewesen *CHI: da xxx die Frös(ch)e , das leg(e) ich mal an den Rand . %mor: adv:loc|da det|die&pl&nom&acc n|Frosch&m&nom&acc-pl cm|cm pro|das v|legen-PRES&1s pro:per|ich adv|mal prep|an det|den&m&sg&acc n|Rand&m&sg&acc . *CHI: das leg(e) ich mal auf das Sofa . %mor: pro|d…		Merit
wenn ich gleich ein Auto male wenn ich [adv:temp] [REF] [PRO] gleich ein Auto [PRO] male failed: Frequenzkritierum wird nicht erreicht	b)	*MOT: guck mal , wenn ich jetzt einen Hut aufsetze , so , wo is(t) dann mein Gesicht ? %mor: vimp|gucken&IMP&2s adv|mal cm|cm conj|wenn pro:per|ich adv|jetzt adjm|ein&det&m&sg&acc-en n|Hut&m&sg&acc auf#v|setzen-PRES&1s cm|cm co|so cm|cm pro:int|wo cop|sein&PRES&3s adv|dann adjm|mein&det&n&sg&nom&acc n|Gesicht&n&sg&nom&acc ?	B			Merit
das soll glaube ich ein Vogel sein das soll glaube ich [REF] sein -ein Vogel- failed: Frequenzkritierum wird nicht erreicht	b)	*MOT: da sind sie im Zoo und hier , das soll glaub(e) ich der Wald sein .	B			Merit
jetzt kriegt er runde Kugeln ran jetzt kriegt [REF] [REF] er -runde Kugeln- failed: ran (add not allowed); Frequenzkriterium für Ableitung des [PRO]-Slots am Ende wird nicht erreicht	b)	*MOT: genau , jetzt kriegt sie eine Hose an %mor: co|genau cm|cm adv|jetzt v|kriegen-PRES&3s pro:per|sie adjm|ein&det&f&nom&acc-e n|Hose&f&sg&nom&acc vpfx|an *CHI: +< jetzt krieg(t) die (ei)nen roten Schnabel . %mor: adv|jetzt v|kriegen-PRES&3s det|die adjm|ein&det&m&sg&acc-en adjm|rot-en n|Schnabel&m&sg&acc .	B, C			Merit
Papa aufräumen die Bücher Papa [PRO] die [REF] aufräumen Bücher failed: [REF]-Slot kann nicht abgeleitet werden, da das Frquenzkriterium nicht erreicht wird	b)	*MOT: der Papa wollte die Markise reinfahr(e)n . %mor: det|der&m&sg&nom n|Papa&m&sg&nom mod|wollen-PAST&KONJ&13s det|die	B			Simon
