# Supplementary material
Source: publisher site journal article supplement (https://www.degruyterbrill.com/publication/isbn/9783110623857/downloadAsset/9783110623857_Digitaler%20Anhang.zip)
Supplement: Supplementary file 2 [file Marieke.pdf › Ableitungen_Zieläußerungen/Marieke.pdf]

Marieke  
(min. Cp: 2, min. Scheme: 2)

Result

papa guck doch mal  
└─ [REF] [PRO] doch mal  
└─ [REF] guck  
papa

Operations

Superimpositions

Substitutes

Additions

mama guck mal  
└─ mama guck mal

2

0

2

0

papa von die schule  
└─ [REF] von die [REF]  
          (die) schule  
papa (von)

0

0

0

0

ich möchte mit das spielen  
└─ mit das [PRO]  
      (das) spielen

2

2

0

0

— FAILED to trace 'ich möchte' (ADD not allowed)

-

-

-

-

was ist das  
└─ was ist das

und das ist mia  
└─ und das ist [REF]  
mia

nein die maus muss immer  
└─ die maus [PRO]  
-muss immer-  
─ nein

immer wieder lila machen  
└─ [ATT] machen  
lila  
─ immer wieder

0 0 0 0

1 0 1 0

2 0 1 1

2 0 2 0

das ist von mir  
└─ das ist von [REF]  
    (von) mir

und die andere ist da  
└─ die [REF] ist da  
    (die) andere  
— und

ich möchte jetzt das aufdecken  
└─ [REF] [PRO] jetzt das [PRO]  
    -ich möchte- aufdecken

du musst erst würfeln  
└─ du musst [PRO]  
    -erst würfeln-

|   |   |   |   |
|---|---|---|---|
| 1 | 1 | 0 | 0 |
| 2 | 1 | 0 | 1 |
| 2 | 0 | 2 | 0 |
| 1 | 0 | 1 | 0 |

wo ist ringel\_rangel\_rose  
└─ wo ist [REF]  
    ringel\_rangel\_rose

wieder da drauf  
└─ [adv] da drauf  
    wieder (da)

und das auch  
└─ und das auch

ich mache das auch  
└─ [REF] [PRO] das auch  
    ich mache (das)

1                      0                      1                      0

1                      1                      0                      0

0                      0                      0                      0

1                      1                      0                      0

nein ich muss das hier wieder aufbauen  
└─ ich muss das hier  
— nein  
— FAILED to trace 'wieder aufbauen' (ADD not allowed)

können wir das nochmal spielen  
└─ können wir das [PRO]  
-nochmal spielen-

ich bin dran  
└─ ich bin dran

oder bin ich dran  
└─ bin ich dran  
— oder

|   |   |   |   |
|---|---|---|---|
| - | - | - | - |
| 1 | 0 | 1 | 0 |
| 0 | 0 | 0 | 0 |
| 1 | 0 | 0 | 1 |

das habe ich  
└─ das habe ich

nein das muss da  
└─ nein das muss da

nein mama du sollst an meine  
└─ du sollst [LOC]  
└─ an [REF]  
meine  
— nein mama

und dann das  
└─ und dann das

0 0 0 0

0 0 0 0

3 0 2 1

0 0 0 0

für mich auch  
└─ für mich  
─ auch

das können wir auch schon  
└─ [REF] [PRO] wir auch schon  
-das können-

was ist da drin  
└─ was ist da drin

ich möchte das  
└─ ich möchte das

|   |   |   |   |
|---|---|---|---|
| 1 | 0 | 0 | 1 |
| 1 | 0 | 1 | 0 |
| 0 | 0 | 0 | 0 |
| 0 | 0 | 0 | 0 |

da muss einer  
└─ da muss [REF]  
einer

|  |   |   |   |   |
|--|---|---|---|---|
|  | 1 | 0 | 1 | 0 |
|--|---|---|---|---|

ich möchte eine rausnehmen  
└─ ich möchte eine  
— FAILED to trace 'rausnehmen' (ADD not allowed)

|  |   |   |   |   |
|--|---|---|---|---|
|  | - | - | - | - |
|--|---|---|---|---|

wieder ein anderes puzzle  
└─ wieder ein [REF]  
(ein) anderes puzzle

|  |   |   |   |   |
|--|---|---|---|---|
|  | 1 | 1 | 0 | 0 |
|--|---|---|---|---|

kann ich mal ein puzzle  
└─ [PRO] [REF] mal ein [REF]  
kann ich (mal) (ein) puzzle

|  |   |   |   |   |
|--|---|---|---|---|
|  | 2 | 2 | 0 | 0 |
|--|---|---|---|---|

ich möchte ein puzzle  
└─ ich möchte ein [REF]  
    (ein) puzzle

aber ich will das  
└─ ich will das  
─ aber

wo ist hasenpuzzle  
└─ wo ist [REF]  
    hasenpuzzle

nein gar nicht gut  
└─ gar nicht gut  
─ nein

|   |   |   |   |
|---|---|---|---|
| 1 | 1 | 0 | 0 |
| 1 | 0 | 0 | 1 |
| 1 | 0 | 1 | 0 |
| 1 | 0 | 0 | 1 |

mit punkte haben die  
└─ mit [REF] [PRO] [REF]  
└─ [REF] haben die  
punkte

und die auch  
└─ und die auch

hast du nochmal das da reingetan  
└─ das da [PRO]  
reingetan  
— FAILED to trace 'hast du nochmal' (ADD not  
allowed)

mama kannst du das  
└─ mama kannst du das

2 0 2 0

0 0 0 0

- - - -

0 0 0 0

das ist das  
└─ das ist das

0 0 0 0

wo ist das deckel  
└─ wo ist das [REF]  
deckel

1 0 1 0

ist das sogar das ein deckel  
└─ das ein [REF]  
deckel  
— FAILED to trace 'ist das sogar' (ADD not allowed)

- - - -

das gar nicht aufräumen  
└─ [REF adv] nicht aufräumen  
das gar (nicht)

1 1 0 0

das musst aufräumen  
└─ das musst  
— FAILED to trace 'aufräumen' (ADD not allowed)

bin ich die kröte  
└─ [PRO] ich die [REF]  
    bin (ich)    kröte

und ein anderes  
└─ und ein [REF]  
    (ein) anderes

moritz auch nicht  
└─ [REF] auch nicht  
    moritz (auch)

|   |   |   |   |
|---|---|---|---|
| - | - | - | - |
| 2 | 2 | 0 | 0 |
| 1 | 1 | 0 | 0 |
| 1 | 1 | 0 | 0 |

die da drin  
└─ [REF] da drin  
die (da)

mama den habe ich  
└─ mama [REF] [PRO] [REF]  
-den habe ich-

so oder so auch  
└─ oder so  
— auch  
— so

und ich auch  
└─ und ich auch

|   |   |   |   |
|---|---|---|---|
| 1 | 1 | 0 | 0 |
| 1 | 0 | 1 | 0 |
| 2 | 0 | 0 | 2 |
| 0 | 0 | 0 | 0 |

ich möchte auch da rein  
└─ [REF] [PRO] auch da rein  
    ich möchte (auch)

das mit das  
└─ [REF] mit das  
    das (mit)

und dann mal so  
└─ und dann mal  
— so

gar nicht da  
└─ gar nicht da

|   |   |   |   |
|---|---|---|---|
| 1 | 1 | 0 | 0 |
| 1 | 1 | 0 | 0 |
| 1 | 0 | 0 | 1 |
| 0 | 0 | 0 | 0 |

wieder ein anderes  
└─ [adv] ein anderes  
wieder (ein)

|   |   |   |   |
|---|---|---|---|
| 1 | 1 | 0 | 0 |
|---|---|---|---|

wo ist noch eins  
└─ wo ist noch eins

|   |   |   |   |
|---|---|---|---|
| 0 | 0 | 0 | 0 |
|---|---|---|---|

ja ich möchte das  
└─ [co] ich möchte das  
ja (ich)

|   |   |   |   |
|---|---|---|---|
| 1 | 1 | 0 | 0 |
|---|---|---|---|

und das auch nicht  
└─ und das auch nicht

|   |   |   |   |
|---|---|---|---|
| 0 | 0 | 0 | 0 |
|---|---|---|---|

und da auch nicht  
└─ und da auch nicht

und da auch  
└─ und da auch

ist das die turnhalle  
└─ ist das die [REF]  
    (die) turnhalle

wieder die nägel gar nicht  
└─ [adv REF] gar nicht  
    └─ wieder die [REF]  
        nägel

|   |   |   |   |
|---|---|---|---|
| 0 | 0 | 0 | 0 |
|---|---|---|---|

|   |   |   |   |
|---|---|---|---|
| 0 | 0 | 0 | 0 |
|---|---|---|---|

|   |   |   |   |
|---|---|---|---|
| 1 | 1 | 0 | 0 |
|---|---|---|---|

|   |   |   |   |
|---|---|---|---|
| 2 | 0 | 2 | 0 |
|---|---|---|---|

ich möchte andere nägel  
└─ ich möchte [REF]  
└─ andere [REF]  
    nägel

2 0 2 0

nein zu die anderen nägel  
└─ zu [REF]  
─ die anderen [REF]  
    Nägel  
─ nein

3 0 2 1

wie das auch  
└─ [conj] das auch  
    wie (das)

1 1 0 0

das ist größer baum  
└─ das ist [ATT] [REF]  
└─ größer [REF]  
    baum

2 0 2 0

das ist roter baum  
└─ das ist [ATT] [REF]  
└─ [ATT] baum  
roter

2 0 2 0

und blau auch gar nicht oder  
└─ auch gar nicht  
— oder  
— FAILED to trace 'und blau' (ADD not allowed)

- - - -

nein ich habe das  
└─ nein ich habe das

0 0 0 0

bei mir auch eine  
└─ [LOC] auch eine  
bei mir (auch)

1 1 0 0

das kann man nicht da drauflegen

└ [REF] [PRO] [REF] nicht da [PRO]

(da) drauflegen

das kann man (nicht)

2

2

0

0

weil da die decke da immer drauf

└ [conj] da die

weil (da)

— FAILED to trace 'decke da immer drauf' (ADD not allowed)

—

—

---

—

und das gleich kaputt

└─ und das [ATT]

└ [adv] kaputt

gleich

2

0

2

0

und das kaputt gemacht

— das kaputt gemacht

— und

1

0

0

1

die andere ist  
└─ die andere [PRO]  
    (andere) ist

und das ist ein lätzchen  
└─ und das ist ein [REF]  
    lätzchen

da muss ich die nägel raus  
└─ da muss ich  
— FAILED to trace 'die nägel raus' (ADD not  
allowed)

wie geht das  
└─ wie geht das

1 1 0 0

1 0 1 0

- - - -

0 0 0 0

mama wie geht das  
└─ mama wie geht das

|                             |   |   |   |   |
|-----------------------------|---|---|---|---|
| mama das ist kaputtgegangen | 0 | 0 | 0 | 0 |
| └─ das ist [PRO]            |   |   |   |   |
| kaputtgegangen              |   |   |   |   |

|                                |   |   |   |   |
|--------------------------------|---|---|---|---|
| nein das in den müll schmeißen | 1 | 0 | 1 | 0 |
| └─ [REF] in den müll [PRO]     |   |   |   |   |
| das                schmeißen   |   |   |   |   |
| ─ nein                         |   |   |   |   |

|                                                       |   |   |   |   |
|-------------------------------------------------------|---|---|---|---|
| ich möchte das hier mit der maus                      | 3 | 0 | 2 | 1 |
| └─ hier mit der [REF]                                 |   |   |   |   |
| (der) maus                                            |   |   |   |   |
| └─ FAILED to trace 'ich möchte das' (ADD not allowed) |   |   |   |   |

- - - -

einer ist raus  
└─ einer ist  
— FAILED to trace 'raus' (ADD not allowed)

das auch da rein  
└─ [REF] auch da rein  
das

und der hammer  
└─ und der [REF]  
hammer

nein gar nicht  
└─ nein gar nicht

|   |   |   |   |
|---|---|---|---|
| - | - | - | - |
| 1 | 0 | 1 | 0 |
| 1 | 0 | 1 | 0 |
| 0 | 0 | 0 | 0 |

ich will das hier  
└─ [REF] [PRO] das hier  
    ich will (das)

cool die klingel  
└─ cool [REF]  
    -die klingel-

du kriegst die alle  
└─ die alle  
— FAILED to trace 'du kriegst' (ADD not allowed)

und das ist meine  
└─ und das ist meine

1 1 0 0

1 0 1 0

- - - -

0 0 0 0

und das ist von marlene  
└─ das ist von [REF]  
      (von) marlene  
— und

2 1 0 1

und das ist von alex  
└─ das ist von [REF]  
      alex  
— und

2 0 1 1

ich da auch erdbeeren  
└─ ich da auch  
— FAILED to trace 'erdbeeren' (ADD not allowed)

- - - -

wo ist erdbeeren  
└─ wo ist [REF]  
      erdbeeren

1 0 1 0

und da ist auch pflaume  
└─ und da ist auch [REF]  
pflaume

und ich habe erdbeere  
└─ und ich habe [REF]  
erdbeere

nein meine ist das  
└─ [co REF] ist das  
-nein meine-

das ist meine karten  
└─ das ist meine [REF]  
karten

1 0 1 0

1 0 1 0

1 0 1 0

1 0 1 0

guck mal papa  
└─ guck mal [REF]  
papa

zwei da pflaume  
└─ [ATT] da [REF]  
zwei pflaume

wo ist banane  
└─ wo ist [REF]  
banane

so soll das sein  
└─ so soll [REF] [PRO]  
(soll) das sein

1 0 1 0

2 0 2 0

1 0 1 0

1 1 0 0

nein da wieder drin  
└─ da wieder [LOC]  
      drin  
— nein

mama meine auch  
└─ mama [REF] auch  
      meine

ich will das machen  
└─ [REF] [PRO] das machen  
      ich will (das)

ich möchte das machen  
└─ ich möchte das [PRO]  
      (das) machen

|   |   |   |   |
|---|---|---|---|
| 2 | 0 | 1 | 1 |
| 1 | 0 | 1 | 0 |
| 1 | 1 | 0 | 0 |
| 1 | 1 | 0 | 0 |

ich stecke eine  
└─ [REF] [PRO] eine  
    -ich stecke-

und du hast die  
└─ du hast die  
─ und

und du machst die ab  
└─ und du [PRO] [REF] [PRO]  
    └─ [PRO] [REF] ab  
        -machst die-

nein erst da  
└─ nein erst da

1                      0                      1                      0

1                      0                      0                      1

2                      0                      2                      0

0                      0                      0                      0

ich auch eine  
└─ [REF] auch eine  
ich (auch)

|   |   |   |   |
|---|---|---|---|
| 1 | 1 | 0 | 0 |
|---|---|---|---|

ich auch noch eine  
└─ [REF] auch noch eine  
ich

|   |   |   |   |
|---|---|---|---|
| 1 | 0 | 1 | 0 |
|---|---|---|---|

nee@o mama auch nicht  
└─ nee@o [REF] auch nicht  
mama (auch)

|   |   |   |   |
|---|---|---|---|
| 1 | 1 | 0 | 0 |
|---|---|---|---|

noch nicht du  
└─ noch nicht [REF]  
(nicht) du

|   |   |   |   |
|---|---|---|---|
| 1 | 1 | 0 | 0 |
|---|---|---|---|

mama alles aufräumen  
 └─ alles aufräumen  
 ── mama

|                                            |   |   |   |   |
|--------------------------------------------|---|---|---|---|
|                                            | 1 | 0 | 0 | 1 |
| aber du hast die da reingesteckt           |   |   |   |   |
| └─ [conj] [REF] [PRO] die da [PRO]         |   |   |   |   |
| -aber du hast-                reingesteckt |   |   |   |   |

|                         |   |   |   |   |
|-------------------------|---|---|---|---|
|                         | 2 | 0 | 2 | 0 |
| ich möchte lieber das   |   |   |   |   |
| └─ ich möchte [adv REF] |   |   |   |   |
| -lieber das-            |   |   |   |   |

|                               |   |   |   |   |
|-------------------------------|---|---|---|---|
|                               | 1 | 0 | 1 | 0 |
| das ist gar nicht so groß     |   |   |   |   |
| └─ das ist gar nicht so [ATT] |   |   |   |   |
| (so) groß                     |   |   |   |   |

|  |   |   |   |   |
|--|---|---|---|---|
|  | 1 | 1 | 0 | 0 |
|--|---|---|---|---|

mama du sollst das  
└─ mama du [PRO] das  
sollst

nein du sollst das  
└─ du sollst [REF]  
das  
— nein

wo ist das noch  
└─ wo ist das noch

das kommt da  
└─ das kommt da

|   |   |   |   |
|---|---|---|---|
| 1 | 0 | 1 | 0 |
| 2 | 0 | 1 | 1 |
| 0 | 0 | 0 | 0 |
| 0 | 0 | 0 | 0 |

und die da  
└─ und die da

wo ist einer  
└─ wo ist [REF]  
einer

oder da rein  
└─ oder da rein

und das passt gar nicht da gerade rein  
└─ das passt gar nicht  
— und  
— FAILED to trace 'da gerade rein' (ADD not allowed)

0 0 0 0

1 0 1 0

0 0 0 0

- - - -

und dann machen wir wieder das  
└─ [conj] [adv] [PRO] [REF] wieder das  
-und dann machen wir-

gar nicht zu papa  
└─ gar nicht [LOC]  
└─ zu [REF]  
papa

moritz guck mal  
└─ [REF] guck mal  
moritz

wo ist lila  
└─ wo ist [ATT]  
(ist) lila

1 0 1 0

2 0 2 0

1 0 1 0

1 1 0 0

nein bei mir unter beine  
└─ unter [REF]  
    beine  
— FAILED to trace 'nein bei mir' (ADD not allowed)

wo ist papi  
└─ wo ist [REF]  
    papi

und das möchte ich  
└─ und das möchte ich

der hat dich gestreichelt  
└─ der hat [REF] [PRO]  
    └─ dich [PRO]  
— FAILED to trace 'gestreichelt'

|   |   |   |   |
|---|---|---|---|
| - | - | - | - |
| 1 | 0 | 1 | 0 |
| 0 | 0 | 0 | 0 |
| - | - | - | - |

oder das hier moritz  
└─ oder das hier  
─ moritz

ich bin das  
└─ ich bin das

fange ich an  
└─ [PRO] ich an  
fange

nein haben wir gespielt  
└─ haben wir [PRO]  
gespielt  
─ nein

|   |   |   |   |
|---|---|---|---|
| 1 | 0 | 0 | 1 |
| 0 | 0 | 0 | 0 |
| 1 | 0 | 1 | 0 |
| 2 | 0 | 1 | 1 |

nein das ist  
└─ nein das ist

wo ist das  
└─ wo ist das

nochmal würfeln moritz  
└─ [PRO] moritz  
-nochmal würfeln-

mama sollen wir das spielen  
└─ sollen wir das [PRO]  
      (das) spielen  
— mama

|   |   |   |   |
|---|---|---|---|
| 0 | 0 | 0 | 0 |
| 0 | 0 | 0 | 0 |
| 1 | 0 | 1 | 0 |
| 2 | 1 | 0 | 1 |

oder sollen wir das umschmeißen  
└─ sollen wir das [PRO]  
      umschmeißen  
— oder

|   |   |   |   |
|---|---|---|---|
| 2 | 0 | 1 | 1 |
|---|---|---|---|

das ist meine  
└─ das ist meine

|   |   |   |   |
|---|---|---|---|
| 0 | 0 | 0 | 0 |
|---|---|---|---|

oder wir möchten das  
└─ [conj] [REF] [PRO] das  
   └─ oder wir [PRO]  
      möchten

|   |   |   |   |
|---|---|---|---|
| 2 | 0 | 2 | 0 |
|---|---|---|---|

ist gar nicht so einfach  
└─ ist gar nicht so [ATT]  
      einfach

|   |   |   |   |
|---|---|---|---|
| 1 | 0 | 1 | 0 |
|---|---|---|---|

nein ich will das hier lieber  
 └─ das hier [ATT]  
     lieber  
 ── FAILED to trace 'nein ich will' (ADD not allowed)

|  |   |   |   |   |
|--|---|---|---|---|
|  | - | - | - | - |
|--|---|---|---|---|

wo ist noch ein würfel  
 └─ wo ist noch ein [REF]  
     (ein) würfel

|  |   |   |   |   |
|--|---|---|---|---|
|  | 1 | 1 | 0 | 0 |
|--|---|---|---|---|

du bist wieder dran  
 └─ du bist  
 ── FAILED to trace 'wieder dran' (ADD not allowed)

|  |   |   |   |   |
|--|---|---|---|---|
|  | - | - | - | - |
|--|---|---|---|---|

nein die müssen da bei uns jetzt stehen bleiben  
 └─ nein die müssen  
 ── FAILED to trace 'da bei uns jetzt stehen bleiben'  
 (ADD not allowed)

|  |   |   |   |   |
|--|---|---|---|---|
|  | - | - | - | - |
|--|---|---|---|---|

und jetzt würfeln  
└─ und jetzt [PRO]  
würfeln

1 0 1 0

wo ist mein würfel  
└─ wo ist mein [REF]  
würfel

1 0 1 0

sondern da draußen bleiben  
└─ sondern [LOC] [PRO]  
└─ [LOC] bleiben  
-da draußen-

2 0 2 0

ich hole das wieder  
└─ ich hole [REF adv]  
-das wieder-

1 0 1 0

wo ist der  
└─ wo ist der

ich nochmal  
└─ ich nochmal

die ist da  
└─ die ist da

ist die dreckig  
└─ ist die [ATT]  
    dreckig

0                      0                      0                      0

0                      0                      0                      0

0                      0                      0                      0

1                      0                      1                      0

und die musik pfeift der  
└─ und die [REF] [PRO] [REF]  
└─ [REF] PRO] der  
└─ musik [PRO]  
pfeift

3 0 3 0

und ein memory spielt der  
└─ und ein [REF] [PRO] [REF]  
└─ [REF] [PRO] der  
└─ [REF] spielt  
memory

3 0 3 0

musik wirft der  
└─ [REF] [PRO] der  
└─ musik [PRO]  
wirft

2 0 2 0

singt der papa  
└─ [PRO] der papa  
singt

1 0 1 0

singt immer in der schule  
 └─ [PRO adv] in der schule  
   └─ [PRO] immer  
     singt

2 0 2 0

und die würfel müssen bei mir in der hand  
 └─ und die [REF] müssen  
     würfel  
 — FAILED to trace 'bei mir in der hand' (ADD not  
 allowed)

- - - -

und die spiele bleiben da stehen  
 └─ und die [REF] [PRO] da stehen  
   └─ [REF] bleiben  
     spiele

2 0 2 0

da in das wohnzimmer  
 └─ da in das [REF]  
     wohnzimmer

1 0 1 0

wo ist meine spieler  
 └─ wo ist meine [REF]  
     spieler

1 0 1 0

hey lass mich los liebe oma  
 └─ liebe [REF]  
     oma  
 — FAILED to trace 'hey@o lass mich los' (ADD not  
 allowed)

- - - -

und böse oma  
 └─ und [ATT] oma  
     böse

1 0 1 0

lass mich los  
 └─ [PRO] [REF] los  
     -lass mich-

1 0 1 0

ich habe böse oma\_mama  
└─ ich habe [REF]  
   └─ böse [REF]  
      oma\_mama

|                         |   |   |   |   |
|-------------------------|---|---|---|---|
|                         | 2 | 0 | 2 | 0 |
| komm ich schiebe dich   |   |   |   |   |
| └─ komm ich [PRO] [REF] |   |   |   |   |
| └─ [PRO] dich           |   |   |   |   |
| schiebe                 |   |   |   |   |

|                      |   |   |   |   |
|----------------------|---|---|---|---|
|                      | 2 | 0 | 2 | 0 |
| in das wohnzimmer    |   |   |   |   |
| └─ in das wohnzimmer |   |   |   |   |

|  |   |   |   |   |
|--|---|---|---|---|
|  | 0 | 0 | 0 | 0 |
|--|---|---|---|---|
