# Supplementary material
Source: publisher site journal article supplement (https://www.degruyterbrill.com/publication/isbn/9783110623857/downloadAsset/9783110623857_Digitaler%20Anhang.zip)
Supplement: Supplementary file 3 [file Fehlertyp_III.xlsx]

## Sheet: fehlgeschlagene_TB
syntaktisch Fehlgeschlagene Tracebacks:	mögliche Erklärung	Korpusbelege für mögliche Schemata	Korpus Bezugsperson (B) vs. Kind (C)	Notizen/Gedanken	Fehlertypen:	Kind
die soll ein_bisschen was kriegen [REF] soll [adv] [PRO] die was kriegen failed: es liegt keine Typvariation zur Ableitung des [adv] und [PRO]-Slots vor. Außerdem ist nicht klar, ob "was" ein geeignter Filler für den [adv]-Slot wäre. Zusätzlich konnte kein Slot für "ein_bisschen" gefunden werden	c)	*MUT: die Giraffe soll auch mithelfen ? %mor: det|die&f&sg&nom&acc n|Giraffe&f&sg&nom&acc mod|sollen-PRES&13s adv|auch mit#vinf|helfen-INF ? *MEC: und der Löwe soll auch mitfliegen ? %mor: conj|und det|der&m&sg&nom n|Löwe&m&sg&nom mod|sollen-PRES&13s adv|auch mit#vinf|fliegen-INF ?	B	auch: [REF] soll auch [PRO] - ergibt sich aus den Daten, da allerdings keine Type-Frequency, kann der adv-Slot nicht abstrakt werden	c) Keine Type-Variation für die Ableitung eines Schemas (hier gilt es das Argument von Bybee zur Analogiebildung zu beachten)	Leo
du kriegst die alle du kriegst [REF] die alle failed: es liegt keine Typvariation zur Ableitung des [REF]-Slots vor.	c)	*CHI: Mama , du kriegst das . %mor: n|Mama&f&sg cm|cm pro:per|du v|kriegen-PRES&2s pro|das . *CHI: Mama , du kreigs [: kriegst] (.) ähm@o , das . %mor: n|Mama&f&sg cm|cm pro:per|du v|kriegen-PRES&2s on|ähm cm|cm pro|das.	C			Marieke
hier soll ein Platz [LOC] soll ein REF hier (ein) Platz failed: es liegt keine Typvariation zur Ableitung des [LOC]-Slots vor.	c)	*CHI: da soll das Baby raus . %mor: adv:loc|da mod|sollen-PRES&13s det|das&n&sg&nom&acc n|Baby&n&sg&nom&acc adv:dir|raus . *CHI: da soll das eigentlich obendrauf stehen . %mor: adv:loc|da mod|sollen-PRES&13s pro|das adv|eigentlich adv:loc|obendrauf vinf|stehen-INF	C			Merit
ich muss sie hier besser malen ich muss [REF] [LOC] [PRO] sie hier malen failed: es liegt keine Typvariation zur Ableitung des [REF]-Slots vor. Außerdem wird keine Äußerung gefunden, durch die der [ATT]-Slot abgeleitet werden kann (Fehlertyp d)	c)	*CHI: ich muss die hier festmachen . %mor: pro:per|ich mod|müssen-PRES&13s pro|die adv:loc|hier fest#vinf|machen-INF . *CHI: ich muss die da anziehen . %mor: pro:per|ich mod|müssen-PRES&13s pro|die adv:loc|da an#vinf|ziehen-INF .	C			Merit
worauf erschrecken sie sich [REF] [PRO] sie sich worauf erschrecken failed: es liegt keine Typvariation zur Ableitung des [PRO]-Slots vor.	c)	*MOT: an wen kuscheln sie sich die beiden ? %mor: prep|an pro:int|wen v|kuscheln-PRES&13p pro:per|sie pro:refl|sich det|die adjm|beid&det-en ? *MOT: und wo kuscheln sie sich hier hin ? %mor: conj|und pro:int|wo v|kuscheln-PRES&13p pro:per|sie pro:refl|sich adv:loc|hier vpfx|hin ?	B			Merit
