# Supplementary material
Source: publisher site journal article supplement (https://www.degruyterbrill.com/publication/isbn/9783110623857/downloadAsset/9783110623857_Digitaler%20Anhang.zip)
Supplement: Supplementary file 3 [file Merit.pdf › Ableitungen_Zieläußerungen/Merit.pdf]

Merit

(min. Cp: 2, minScheme: 2)

Result

die spielt auch mit

└─ die [PRO] auch mit  
spielt

die kann hier reinpassen

└─ [REF] kann hier [PRO]  
die (kann) reinpassen

die fährt los

└─ [REF] [PRO] los  
-die fährt-

den lautsprecher sieht die nicht

└─ [REF] [PRO] die nicht  
└─ den [REF] sieht  
lautsprecher

und hier kommt die merit hinten rein

└─ hier kommt [REF] [LOC] [PRO]  
-die Merit- -hinten rein-

— und

die stellt sich da rein

└─ die [PRO] sich da  
stellt (sich)

— rein

Operations

Superimpositions

Substitutes

Additions

1

0

1

0

2

2

0

0

1

0

1

0

2

0

2

0

3

0

2

1

2

1

0

1

und die inga will da auch mit  
 └─ [conj] [REF] [PRO] da auch mit  
   └─ und die [REF] [PRO]  
 └─ [REF] will  
   inga

3 0 3 0

ich kann mit inga lieber fahren  
 └─ ich kann mit [REF] [PRO]  
   └─ inga [PRO]  
 └─ [adv] fahren  
   lieber

3 0 3 0

hier soll ein platz  
 └─ soll ein [REF]  
   (ein) platz  
 — FAILED to trace 'hier' (ADD not allowed)

- - - -

hier könnte die fiene\_biene noch hin  
 └─ [LOC] könnte die  
   └─ hier (könnte) die [REF]  
                   fiene\_biene  
 — noch hin

3 1 1 1

die nimmt ihren schnuller mit  
 └─ die [PRO] [REF] mit  
   └─ [PRO] ihren [REF]  
   nimmt      schnuller

3 0 3 0

die legt sich in das puppenbett

└ [REF] [PRO] [REF] in das [REF]

puppenbett

└ [REF] legt sich

die (legt)

3

1

2

0

da legt die den schnuller rein

└─ da [PRO] [REF] [REF] rein

└ [PRO] die den [REF]

legt (den) schnuller

3

2

1

0

die kleine merit

└─ die kleine merit

0

0

0

0

die merit passt da rein

└ [REF] passt da rein

-die merit-

1

0

1

0

die liegt im bett und schläft

└ [REF] liegt im

die (liegt)

— FAILED to trace 'bett und schläft' (ADD not allowed)

—

-

-

ich habe das im zimmer

└─ ich habe das [LOC]

im zimmer

2

0

2

0

ich will das nicht  
 └─ ich will das [adv]  
     (das) nicht

1                      1                      0                      0

das schnullert das kleine mädchen  
 └─ [REF] [PRO] das kleine [REF]  
   └─ das [PRO]                      mädchen  
       schnullert

3                      0                      3                      0

und wo ist der andere schnuller  
 └─ und wo ist der [REF]  
   └─ andere [REF]  
       schnuller

2                      0                      2                      0

was war das  
 └─ was war das

0                      0                      0                      0

und die hat den jetzt  
 └─ die hat den  
 ── jetzt  
 ── und

2                      0                      0                      2

das halte ich mal hier hin  
 └─ das [PRO] ich mal  
     halte  
 ── FAILED to trace 'hier hin' (ADD not allowed)

da hinten liegt noch eine  
 └─ [LOC] liegt noch eine  
     da hinten (liegt)

wie heißt du  
 └─ wie heißt du

das ist in einem bett  
 └─ das ist in [REF]  
   └─ einem [REF]  
       bett

und die oma liegt hier  
 └─ [REF] liegt hier  
   -die Oma-  
 ── und

|   |   |   |   |   |
|---|---|---|---|---|
| - | - | - | - |   |
|   | 1 | 1 | 0 | 0 |
|   | 0 | 0 | 0 | 0 |
|   | 2 | 0 | 2 | 0 |
|   | 2 | 0 | 1 | 1 |

die will nicht schlafen  
└ [REF] will nicht [PRO]  
die schlafen

2                      0                      2                      0

ich habe das hier  
└─ ich habe das [LOC]  
          (das) hier

1                      1                      0                      0

und du bist nicht nackt  
└─ du bist [nicht ATT]  
nackt  
— und

2                      0                      2                      0

und wo ist der papa  
 └─ und wo ist der [REF]  
 papa

1                      0                      1                      0

```

der soll jetzt mit mir die puppe anschauen
└─ die puppe [PRO]
      anschauen
— FAILED to trace 'der soll jetzt mit mir' (ADD not allowed)

```

— — — — —

wem könnte der passen  
 └── [REF] könnte der [PRO]  
     wem            passen

2                   0                   2                   0

die braucht eine neue windel  
 └── [REF] braucht eine neue windel  
     die (braucht)

1                   1                   0                   0

der zieht meine windel an  
 └── [REF] zieht [REF] an  
     der        -meine Windel-

2                   0                   2                   0

der hat in die windel a\_a gemacht  
 └── [REF] hat in  
     der (hat)  
 — FAILED to trace 'die windel a\_a gemacht' (ADD not allowed)

-                   -                   -                   -

und vielleicht hat der a\_a gemacht  
 └── hat [REF] [REF] gemacht  
     der   a\_a  
 — und vielleicht

3                   0                   2                   1

wieder zu die windel  
 └─ die windel  
 ── FAILED to trace 'wieder zu' (ADD not allowed)

die hat nicht a\_a gemacht  
 └─ [REF] hat nicht [REF] [PRO]  
   die (hat)     -a\_a gemacht-

da liegt ja alles rum  
 └─ [LOC] [PRO] ja alles [PRO]  
   da liegt (ja)       rum

da kann ein auto fahren  
 └─ da kann [REF] [PRO]  
   └─ ein auto [PRO]  
     (auto) fahren

eine grüne ampel  
 └─ eine grüne ampel

|   |   |   |   |   |
|---|---|---|---|---|
| - | - | - | - |   |
|   |   |   |   |   |
|   | 2 | 2 | 0 | 0 |
|   |   |   |   |   |
|   | 2 | 0 | 2 | 0 |
|   |   |   |   |   |
|   | 2 | 1 | 1 | 0 |
|   |   |   |   |   |
|   | 0 | 0 | 0 | 0 |

— FAILED to trace 'weiß und gelb' (ADD not allowed)

— FAILED to trace 'bei' (ADD not allowed)

(ein) auto

-das fährt-

warte

—

—

—

—

—

—

—

—

1

1

0

0

1

0

1

0

1

0

1

0

das fährt hier oben drauf  
 └─ [REF] [PRO] hier oben [PRO]  
   -das fährt-   (oben) drauf

2 2 0 0

das auto guckt sich die an  
 └─ [REF] [PRO] sich die [PRO]  
                   (die) an  
 └─ das auto [PRO]  
      guckt

3 0 3 0

wie der aussieht  
 └─ wie der aussieht

0 0 0 0

und hier lag etwas drunter  
 └─ und hier [PRO] [REF] [PRO]  
   └─ [PRO] etwas [PRO]  
      lag           drunter

3 0 3 0

ich brauche jetzt meine stifte  
 └─ ich brauche [adv REF]  
   └─ jetzt meine [REF]  
      stifte

2 0 2 0

den kann ich mich holen  
 └─ kann ich mich  
 ── FAILED to trace 'den' (ADD not allowed)  
 ── FAILED to trace 'holen' (ADD not allowed)

ich male etwas grünes  
 └─ ich male etwas [ATT]  
     grünes

weil ich da  
 └─ weil ich da

so kann man dann gehen  
 └─ [adv] kann man [PRO]  
     so (kann)   -dann gehen-

und wo ist blau  
 └─ und wo ist [ATT]  
     (ist) blau

|   |   |   |   |   |
|---|---|---|---|---|
| - | - | - | - |   |
|   | 1 | 0 | 1 | 0 |
|   | 0 | 0 | 0 | 0 |
|   | 2 | 0 | 2 | 0 |
|   | 1 | 1 | 0 | 0 |

wenn man nicht gehen kann  
 └── [conj] [REF] [PRO] kann  
   └── wenn man [PRO]  
       (man) nicht gehen

2 1 1 0

wo kann man nicht gehen  
 └── [REF] kann man nicht [PRO]  
   wo (kann) gehen

2 0 2 0

das kannst du ja auch machen  
 └── [REF] kannst du ja auch [PRO]  
   das machen

2 0 2 0

wenn ich gleich ein auto male  
 └── ein auto [PRO]  
   male  
 — FAILED to trace 'wenn ich gleich' (ADD not allowed)

- - - -

uh@o so sieht ein auto aus  
 └── so sieht [REF] aus  
   ein auto  
 — uh@o

2 0 1 1

und so sieht das auto aus  
 └─ so sieht das [REF] aus  
     auto  
 ── und

|   |   |   |   |
|---|---|---|---|
| 2 | 0 | 1 | 1 |
|---|---|---|---|

das hat kein fahrbeine@c  
 └─ [REF] hat kein[REF]  
     das (hat)     fahrbeine@c

|   |   |   |   |
|---|---|---|---|
| 2 | 1 | 1 | 0 |
|---|---|---|---|

und der mund schimpft hier  
 └─ und der [REF] [PRO] hier  
     -mund schimpft-

|   |   |   |   |
|---|---|---|---|
| 1 | 0 | 1 | 0 |
|---|---|---|---|

und wie weint der  
 └─ und wie [PRO] der  
     weint

|   |   |   |   |
|---|---|---|---|
| 1 | 0 | 1 | 0 |
|---|---|---|---|

ich habe nicki gerufen  
 └─ ich habe [REF] [PRO]  
     └─ nicki [PRO]  
         gerufen

|   |   |   |   |
|---|---|---|---|
| 2 | 0 | 2 | 0 |
|---|---|---|---|

der hat viele hände der mann

└─ der hat [REF] [REF]

└─ [REF] der mann

└─ viele [REF]

hände

3

0

3

0

der kann das tragen die puppen

└─ [REF] kann das [PRO]

der (kann) tragen

— FAILED to trace 'die puppen' (ADD not allowed)

-

-

-

-

hat so viele hände

└─ [PRO] so viele [REF]

hat (so) hände

2

0

2

0

und male eine stoffpuppe

└─ male eine [REF]

— und

— FAILED to trace 'stoffpuppe'

-

-

-

-

und das eine weint

└─ und das eine

— FAILED to trace 'weint' (ADD not allowed)

-

-

-

-

wo ist es  
└─ wo ist es

0 0 0 0

ein weinendes gesicht  
└─ ein [ATT] gesicht  
— FAILED to trace 'weinendes'

- - - -

das hier nicht  
└─ das hier [adv]  
(hier) nicht

1 1 0 0

ich male den auch mal an  
└─ [REF] [PRO] [REF] auch mal [PRO]  
-ich male den- (mal) an

2 2 0 0

die seite muss ich umblättern  
└─ [REF] muss ich [PRO]  
-die seite- umblättern

2 0 2 0

und dann kann ich das haben  
└─ dann kann ich das [PRO]  
(das) haben  
— und

2 1 0 1

|                                                           |   |   |   |   |
|-----------------------------------------------------------|---|---|---|---|
| die beiden blätter                                        |   |   |   |   |
| └─ die beiden [REF]                                       |   |   |   |   |
| blätter                                                   |   |   |   |   |
|                                                           | 1 | 0 | 1 | 0 |
| ich habe sie wieder aufgehoben                            |   |   |   |   |
| └─ sie wieder [PRO]                                       |   |   |   |   |
| aufgehoben                                                |   |   |   |   |
| — FAILED to trace 'ich habe' (ADD not allowed)            |   |   |   |   |
|                                                           | - | - | - | - |
| und von gestern den hast du gemalt                        |   |   |   |   |
| └─ hast du gemalt                                         |   |   |   |   |
| — FAILED to trace 'und von gestern den' (ADD not allowed) |   |   |   |   |
|                                                           | - | - | - | - |
| der andere gesichter_mund                                 |   |   |   |   |
| └─ der andere [REF]                                       |   |   |   |   |
| — FAILED to trace 'gesichter_mund'                        |   |   |   |   |
|                                                           | - | - | - | - |
| ich male einen gelben weinenden mund                      |   |   |   |   |
| └─ ich male einen [REF]                                   |   |   |   |   |
| └─ gelben [REF]                                           |   |   |   |   |
| weinenden mund                                            |   |   |   |   |
|                                                           | 2 | 0 | 2 | 0 |
| der hat einen gelben weinenden mund                       |   |   |   |   |
| └─ der hat einen [REF]                                    |   |   |   |   |
| └─ gelben [REF]                                           |   |   |   |   |
| weinenden mund                                            |   |   |   |   |
|                                                           | 2 | 0 | 2 | 0 |

ein fuchs ist das  
└─ [REF] ist das  
ein fuchs

|   |   |   |   |
|---|---|---|---|
| 1 | 0 | 1 | 0 |
|---|---|---|---|

der hat einen weinenden mund  
└─ der hat einen [REF]  
(einen) weinenden mund

|   |   |   |   |
|---|---|---|---|
| 1 | 1 | 0 | 0 |
|---|---|---|---|

und nicki hat auch geweint  
└─ und nicki [PRO]  
-hat auch- geweint

|   |   |   |   |
|---|---|---|---|
| 2 | 0 | 2 | 0 |
|---|---|---|---|

was ist das  
└─ was ist das

|   |   |   |   |
|---|---|---|---|
| 0 | 0 | 0 | 0 |
|---|---|---|---|

und wer ist das jetzt  
└─ [conj REF] ist das jetzt  
und wer

|   |   |   |   |
|---|---|---|---|
| 1 | 0 | 1 | 0 |
|---|---|---|---|

der könnte frederik heißen  
└─ der könnte [REF] heißen  
frederik

|   |   |   |   |
|---|---|---|---|
| 1 | 0 | 1 | 0 |
|---|---|---|---|

und dann male ich hier neben dominik hin

└─ dann male ich hier

─ und

─ FAILED to trace 'neben dominik hin' (ADD not allowed)

das er gesicht

└─ das [REF] [REF]

└─ er [REF]

gesicht

-

-

-

-

das sind ihre ohren

└─ das sind ihre [REF]

ohren

2

0

2

0

die ohren sind von dominik

└─ [REF] sind von [REF]

die ohren

dominik

1

0

1

0

so meinte ich es

└─ [adv PRO] ich es

└─ so [PRO]

meinte

2

0

2

0

2

0

2

0

das könnte paula sein  
└─ das könnte [REF] sein  
paula

1 0 1 0

ja die hüpfte hoch  
└─ ja die [PRO] [ATT]  
└─ [PRO] hoch  
hüpft

2 0 2 0

und das ist paulas jacke  
└─ und das ist [REF] [REF]  
└─ paulas [REF]  
jacke

2 0 2 0

was ich gerade male  
└─ [REF] ich gerade [PRO]  
was (ich) male

2 0 2 0

die farbe brauche ich noch  
└─ [REF] brauche ich noch  
die farbe

1 0 1 0

das ist der dominik  
 └─ das ist der [REF]  
     dominik

1                      0                      1                      0

der becher von der puppe  
 └─ [REF] von der [REF]  
     (der) puppe  
     └─ der [REF]  
        becher

3                      2                      1                      0

und das noch das tuch  
 └─ [conj] das [adv] [REF]  
     und (das) noch -das tuch-

3                      1                      2                      0

weil da der braunbär gestanden hat  
 └─ weil da [REF] [PRO]  
     └─ [REF]     [PRO] hat  
        -der braunbär- gestanden

3                      0                      3                      0

das kann ja wohl nicht sein

└─ das kann ja [PRO]

└─ [adv] nicht sein

wohl (nicht)

2

1

1

0

der braunbär hat mir die sachen runtergeworfen

└─ [REF] [PRO] mir die [REF] [PRO]

└─ der braunbär [PRO]

hat

└─ sachen [PRO]

runtergeworfen

4

0

4

0

deshalb habe ich dem braunbär gesagt dass er das nicht soll

└─ [adv] habe ich

deshalb

— FAILED to trace 'dem braunbär gesagt dass er das nicht soll'

(ADD not allowed)

-

-

-

-

weil ich was male

└─ ich was [PRO]

(was) male

— weil

2

1

0

1

wo ist das gummi  
└─ wo ist das [REF]  
    (das) gummi

wo ist die nachtdecke  
└─ wo ist die [REF]  
── FAILED to trace 'nachtdecke'

wo ist die  
└─ wo ist die

und hier liegt das gerät  
└─ und hier [PRO REF]  
    └─ [PRO] das gerät  
        liegt (das)

ich male etwas das grün ist an  
└─ ich male etwas  
└─ FAILED to trace 'das grün ist an' (ADD not allowed)

1 1 0 0

- - - -

0 0 0 0

2 1 1 0

- - - -

da bei den hand  
 └─ da bei [REF]  
   └─ den [REF]  
     hand

2 0 2 0

ich male ein schneeflöckchen\_weißröckchen  
 └─ ich male ein [REF]  
 ── FAILED to trace 'schneeflöckchen\_weißröckchen'

- - - -

kommst du geschneit  
 └─ kommst du geschneit

0 0 0 0

was hat das schneeflöckchen an  
 └─ was hat das [REF] [PRO]  
   └─ [REF] an  
     schneeflöckchen

2 0 2 0

eine runde blume  
 └─ eine [ATT] blume  
     runde

1 0 1 0

die habe ich dem schneeflöckchen gemalt

└─ die habe ich [REF] [PRO]

└─ dem [REF] gemalt  
    schneeflöckchen

|   |   |   |   |
|---|---|---|---|
| 2 | 0 | 2 | 0 |
|---|---|---|---|

das hat einen weinenden mund

└─ das hat einen [REF]

    (einen) weinenden mund

|   |   |   |   |
|---|---|---|---|
| 1 | 1 | 0 | 0 |
|---|---|---|---|

und deshalb sind die traurig die kleinen schneeflöckchen

└─ die kleinen [REF]

    schneeflöckchen

— FAILED to trace 'und deshalb sind die traurig' (ADD not allowed)

|   |   |   |   |
|---|---|---|---|
| - | - | - | - |
|---|---|---|---|

deshalb haben die einen weinenden mund

└─ [adv] haben die [REF]

    deshalb (haben) -einen weinenden mund-

|   |   |   |   |
|---|---|---|---|
| 2 | 0 | 2 | 0 |
|---|---|---|---|

ich lasse die schneeflöckchen mal weg

└─ [REF] [PRO] die [REF] [adv PRO]

    -ich lasse-

└─ [REF] mal weg

    schneeflöckchen

|   |   |   |   |
|---|---|---|---|
| 3 | 0 | 3 | 0 |
|---|---|---|---|

hier ist der weinende mund

└─ hier ist der [REF]

└─ [ATT] mund

weinende

2

0

2

0

der hatte noch beine

└─ [REF] [PRO] noch [REF]

der hatte Beine

3

0

3

0

ich habe ihm die angemalt

└─ ich habe [REF] [REF] [PRO]

└─ ihm die [PRO]

angemalt

2

0

2

0

der hat schuhen an

└─ der hat [REF] an

schuhen

1

0

1

0

jetzt kriegt er runde kugeln ran

└─ kugeln [PRO]

ran

— FAILED to trace 'jetzt kriegt er runde' (ADD not allowed)

-

-

-

-

so eine farbe  
└─ so eine [REF]  
    (eine) farbe

|   |   |   |   |
|---|---|---|---|
| 1 | 1 | 0 | 0 |
|---|---|---|---|

der kriegt mal knöpfe  
└─ der kriegt [adv REF]  
    └─ mal [REF]  
        knöpfe

|   |   |   |   |
|---|---|---|---|
| 2 | 0 | 2 | 0 |
|---|---|---|---|

ich habe da das hingemalt  
└─ [REF] [PRO] da das [PRO]  
    ich habe (da) hingemalt

|   |   |   |   |
|---|---|---|---|
| 2 | 0 | 2 | 0 |
|---|---|---|---|

das steht da dran  
└─ [REF] [PRO] da dran  
    das steht (da)

|   |   |   |   |
|---|---|---|---|
| 1 | 1 | 0 | 0 |
|---|---|---|---|

das ist keine  
└─ das ist keine

|   |   |   |   |
|---|---|---|---|
| 0 | 0 | 0 | 0 |
|---|---|---|---|

da geht die treppe hoch  
 └─ da geht die Treppe [DIR]  
     hoch

1                      0                      1                      0

der hat keine ohren  
 └─ der hat keine [REF]  
     (keine) ohren

1                      1                      0                      0

der kriegt nur blaue augen  
 └─ [REF PRO] nur [REF]  
     -der kriegt-  
     └─ blaue [REF]  
         augen

3                      0                      3                      0

zu dem zahnarzt  
 └─ zu dem [REF]  
     zahnarzt

1                      0                      1                      0

aber die können gar nicht gucken  
 └─ die [PRO] gar nicht [PRO]  
     (die) können (gar nicht) gucken  
 ── aber

3                      2                      0                      1

die kann gar nicht bei dem mund gucken  
 └─ [REF] kann gar nicht  
   die (kann)  
 ── FAILED to trace 'bei dem mund gucken' (ADD not allowed)

die giraffe schüttelt sich  
 └─ die giraffe [PRO] [REF]  
   └─ [PRO] sich  
     schüttelt

da kommt die mama  
 └─ da kommt die [REF]  
   (die) mama

da hinten liegt die  
 └─ da hinten liegt [REF]  
   (liegt) die

die geht zum zahnarzt  
 └─ [REF] [PRO] zum zahnarzt  
   -die geht-

|   |   |   |   |   |
|---|---|---|---|---|
| - | - | - | - |   |
|   | 2 | 0 | 2 | 0 |
|   | 1 | 1 | 0 | 0 |
|   | 1 | 1 | 0 | 0 |
|   | 1 | 0 | 1 | 0 |

da ist die  
└─ da ist die

0 0 0 0

hier hole ich die  
└─ hier [PRO] [REF] [REF]  
-hole ich die-

1 0 1 0

und dann fährt sie hier weg mit dem auto  
└─ mit dem auto  
— FAILED to trace 'und dann fährt sie hier weg' (ADD not allowed)

- - - -

so wie du  
└─ so wie du

0 0 0 0

glänzen jetzt die zähne  
└─ [PRO] jetzt die [REF]  
glänzen (die) zähne

2 1 1 0

nicht die mit der kuh  
 └─ die mit der [REF]  
     kuh  
 ─ nicht

2 0 1 1

wo ist maria und josef  
 └─ wo ist [REF] und [REF]  
     maria (und) josef

1 1 0 0

und die anderen kläppchen machen wir nicht auf  
 └─ wir nicht [PRO]  
     (nicht) auf  
 ─ FAILED to trace 'und die anderen kläppchen machen' (ADD not allowed)

da muss das wieder reinstecken  
 └─ das [PRO] [REF] [adv] [PRO]  
     muss  
       das wieder [PRO]  
         reinstecken

- - - -

3 0 3 0

hier muss ich  
 └─ [LOC] muss ich  
     hier (muss)

1 1 0 0

und das da  
└─ und das da

0 0 0 0

ich muss das  
└─ ich muss das

0 0 0 0

hier ist nichts drin  
└─ hier ist [adv] drin  
nichts

1 0 1 0

und das mit dem haus  
└─ das mit dem [REF]  
(dem) haus  
— und

2 1 0 1

maria und josef die haben das baby  
└─ [REF] und [REF] [REF] [PRO] [REF]  
-die haben- -das baby-  
— FAILED to trace 'josef'  
— FAILED to trace 'maria'

- - - -

da liegt es  
└─ da liegt es

0 0 0 0

und da ist das nachtgespenst  
└─ und da ist das [REF]  
nachtgespenst

1 0 1 0

die erschrecken sich  
└─ die [PRO] sich  
erschrecken

1 0 1 0

worauf erschrecken sie sich  
└─ [REF] [PRO] sie sich  
└─ [REF] erschrecken  
— FAILED to trace 'worauf'

- - - -

da ist maria  
└─ da ist [REF]  
maria

1 0 1 0

das ist josef  
└─ das ist [REF]  
josef

|                                                              |   |   |   |   |
|--------------------------------------------------------------|---|---|---|---|
|                                                              | 1 | 0 | 1 | 0 |
| und warum nicht vorher drauf geritten                        |   |   |   |   |
| └─ drauf [PRO]                                               |   |   |   |   |
| geritten                                                     |   |   |   |   |
| — FAILED to trace 'und warum nicht vorher' (ADD not allowed) |   |   |   |   |

|                     |   |   |   |   |
|---------------------|---|---|---|---|
|                     | - | - | - | - |
| eine kuh trinkt was |   |   |   |   |
| └─ [REF] [PRO] was  |   |   |   |   |
| └─ -eine kuh- [PRO] |   |   |   |   |
| trinkt              |   |   |   |   |

|                       |   |   |   |   |
|-----------------------|---|---|---|---|
|                       | 2 | 0 | 2 | 0 |
| da liegt das baby     |   |   |   |   |
| └─ da liegt das [REF] |   |   |   |   |
| (das) baby            |   |   |   |   |

|   |   |   |   |
|---|---|---|---|
| 1 | 1 | 0 | 0 |
|---|---|---|---|

ich bin geplumpst  
└─ ich bin [PRO]  
    geplumpst

|   |   |   |   |
|---|---|---|---|
| 1 | 0 | 1 | 0 |
|---|---|---|---|

hinter das gerät bin ich geplumpst  
└─ [LOC] bin ich [PRO]  
    geplumpst  
    └─ hinter [REF]  
        das gerät

|   |   |   |   |
|---|---|---|---|
| 3 | 0 | 3 | 0 |
|---|---|---|---|

da war ein wesen  
└─ da war ein [REF]  
    wesen

|   |   |   |   |
|---|---|---|---|
| 1 | 0 | 1 | 0 |
|---|---|---|---|

das sind die hirten  
└─ das sind die [REF]  
    hirten

|   |   |   |   |
|---|---|---|---|
| 1 | 0 | 1 | 0 |
|---|---|---|---|

wo schläft maria  
└─ wo schläft [REF]  
    maria

|   |   |   |   |
|---|---|---|---|
| 1 | 0 | 1 | 0 |
|---|---|---|---|

wo ist das jesuskind  
 └─ wo ist das [REF]  
     jesuskind

1                      0                      1                      0

und da liegt das  
 └─ da liegt das  
 ── und

1                      0                      0                      1

und was wollen die schenken  
 └─ und was [PRO] [REF] [PRO]  
     └─ wollen die [PRO]  
       (die) schenken

2                      1                      1                      0

das wollen die dem baby schenken  
 └─ [REF] wollen die [REF] [PRO]  
     das (wollen)  
     └─ [REF] schenken  
       dem baby

3                      2                      1                      0

und da ist meine brille  
 └─ und da ist [REF]  
   └─ meine [REF]  
     brille

|   |   |   |   |
|---|---|---|---|
| 2 | 0 | 2 | 0 |
|---|---|---|---|

brille auf die nase  
 └─ [REF] auf [LOC]  
     brille (auf) die Nase

|   |   |   |   |
|---|---|---|---|
| 2 | 2 | 0 | 0 |
|---|---|---|---|

sonst tue ich mich weh  
 └─ [adv PRO] ich mich [PRO]  
                                   weh  
   └─ sonst [PRO]  
     tue

|   |   |   |   |
|---|---|---|---|
| 3 | 0 | 3 | 0 |
|---|---|---|---|

ein stuhl und ein ding  
 └─ [REF] und ein [REF]  
     -ein stuhl- (ein) ding

|   |   |   |   |
|---|---|---|---|
| 2 | 2 | 0 | 0 |
|---|---|---|---|

und das ein stuhl  
 └─ und das [REF]  
     -ein stuhl-

|   |   |   |   |
|---|---|---|---|
| 1 | 0 | 1 | 0 |
|---|---|---|---|

das isst der papa bald  
 └─ [REF] [PRO] der papa [adv]  
     -das isst-           bald

2                   0                   2                   0

ich will auch drücken  
 └─ ich will auch [PRO]  
                   drücken

1                   0                   1                   0

für die küchenmaschine  
 └─ für die [REF]  
           küchenmaschine

1                   0                   1                   0

ich male gerade  
 └─ ich male [adv]  
               gerade

1                   0                   1                   0

ich kann nicht zu dir kommen  
 └─ [REF] kann nicht [LOC] [PRO]  
     ich (kann)        -zu dir kommen-

2                   2                   0                   0

ich hüpfе an der lehne  
 └─ [REF] [PRO] an der lehne  
 -ich hüpfе-

1 0 1 0

ich habe an der lehne gehüpft  
 └─ [REF] [PRO] an der lehne [PRO]  
 -ich habe- gehüpft

2 0 2 0

kriege ich dunkel  
 └─ [PRO] [REF] dunkel  
 -kriege ich-

1 0 1 0

ich male auch einen wurm  
 └─ ich male auch [REF]  
 -einen wurm-

1 0 1 0

das ist etwas anderes  
 └─ [REF] [PRO] etwas anderes  
 das ist (etwas)

1 1 0 0

wo ist der rosa kringel  
 └─ wo ist der [REF]  
   └─ rosa [REF]  
     kringel

2 0 2 0

der geht kaputt  
 └─ [REF] [PRO] kaputt  
   -der geht-

1 0 1 0

ich male noch ein  
 └─ ich male noch ein

0 0 0 0

ich habe einen knick gesehen  
 └─ ich habe einen [REF] [PRO]  
   └─ [REF] gesehen  
     knick

2 0 2 0

ich muss sie hier besser malen  
 └─ [REF] [PRO] sie hier  
   -ich muss-  
 ── FAILED to trace 'besser malen' (ADD not allowed)

- - - -

ich male hier was drauf  
 └─ ich [PRO] [LOC] [REF] drauf  
     male hier was

hier ist der bommel  
 └─ hier ist der [REF]  
     bommel

wo habe ich gemalt  
 └─ [REF] habe ich gemalt  
     wo

und da vielleicht  
 └─ und da [adv]  
     (da) vielleicht

da sind sie alle runtergefallen  
 └─ sind sie alle  
 — FAILED to trace 'da' (ADD not allowed)  
 — FAILED to trace 'runtergefallen' (ADD not allowed)

|   |   |   |   |
|---|---|---|---|
| 3 | 0 | 3 | 0 |
| 1 | 0 | 1 | 0 |
| 1 | 0 | 1 | 0 |
| 1 | 1 | 0 | 0 |

- - - -

ich hole den mal  
 └─ [REF] [PRO] den mal  
 ich hole (den)

1 1 0 0

die haben aua gemacht  
 └─ die haben [REF] [PRO]  
 └─ [REF] gemacht  
 aua

2 0 2 0

aua habt ihr gemacht  
 └─ [REF] habt ihr gemacht  
 aua

1 0 1 0

hier liegt noch mehr papier  
 └─ [LOC] [PRO] noch mehr [REF]  
 hier liegt (noch) papier

2 0 2 0

hier können die liegen  
 └─ [LOC] können die [PRO]  
 hier (können) liegen

2 1 1 0

hier ist extra mein stift  
 └─ hier ist [ATT] [REF]  
   └─ extra [REF]  
     -mein stift-

2 0 2 0

ich gehe hin  
 └─ ich gehe [PRO]  
     hin

1 0 1 0

male ich obendrauf einen bommel  
 └─ male ich [LOC] [REF]  
     obendrauf -einen Bommel-

2 0 2 0

der sieht gar nichts  
 └─ [REF] [PRO] gar nichts  
     -der sieht-

1 0 1 0

der andere pixie hat das gesehen  
 └─ [REF] hat das [PRO]  
     -der andere Pixie- (das) gesehen

2 1 1 0

das da ist der pixie  
└─ das da ist der [REF]  
          pixie

|   |   |   |   |
|---|---|---|---|
| 1 | 0 | 1 | 0 |
|---|---|---|---|

und der schwanz sieht nichts  
└─ und der [REF] [PRO] [REF]  
   └─ [REF] sieht [adv]  
      schwanz  nichts

|   |   |   |   |
|---|---|---|---|
| 3 | 0 | 3 | 0 |
|---|---|---|---|

das ist ein tier  
└─ das ist ein [REF]  
          (ein) tier

|   |   |   |   |
|---|---|---|---|
| 1 | 1 | 0 | 0 |
|---|---|---|---|

das hat einen schwanz  
└─ das hat einen [REF]  
          (einen) schwanz

|   |   |   |   |
|---|---|---|---|
| 1 | 1 | 0 | 0 |
|---|---|---|---|

da kann ich reinkrabbeln  
└─ da kann ich [PRO]  
          reinkrabbeln

|   |   |   |   |
|---|---|---|---|
| 1 | 0 | 1 | 0 |
|---|---|---|---|

und macht die Äuglein zu

└─ macht die [REF] zu

Äuglein

— und

2

0

1

1

da sieht man etwas dunkles

└─ [LOC] [PRO] [REF] etwas [ATT]

-da sieht man- dunkles

2

0

2

0

kein spielzeug für dich

└─ [REF] für dich

└─ kein [REF]

spielzeug

2

0

2

0

und was gestreiftes

└─ und was

— FAILED to trace 'gestreiftes' (ADD not allowed)

-

-

-

-

das soll glaube ich ein vogel sein

└─ ein vogel sein

— FAILED to trace 'das soll glaube ich' (ADD not allowed)

-

-

-

-

hier kommt die geige hin  
└─ hier kommt die [REF] [PRO]  
└─ [REF] hin  
    (die) geige

|   |   |   |   |
|---|---|---|---|
| 2 | 1 | 1 | 0 |
|---|---|---|---|

das schläft gerade  
└─ das [PRO] gerade  
    schläft

|   |   |   |   |
|---|---|---|---|
| 1 | 0 | 1 | 0 |
|---|---|---|---|

da soll das nicht schlafen  
└─ da soll das nicht  
— FAILED to trace 'schlafen' (ADD not allowed)

|   |   |   |   |
|---|---|---|---|
| - | - | - | - |
|---|---|---|---|

ich brauche einen schnuller  
└─ ich brauche [REF]  
    -einen schnuller-

|   |   |   |   |
|---|---|---|---|
| 1 | 0 | 1 | 0 |
|---|---|---|---|

der pizza kommt  
└─ der [REF] kommt  
    pizza

|   |   |   |   |
|---|---|---|---|
| 1 | 0 | 1 | 0 |
|---|---|---|---|

der setzt sich neben den braunbären

└─ [REF] setzt sich [LOC]

der

└─ neben den [REF]

braunbären

3

0

3

0

ich male einen duplostein

└─ ich male einen [REF]

duplostein

1

0

1

0

für das pferd

└─ für das pferd

0

0

0

0

und hier ist der arzt

└─ und hier ist der [REF]

(der) arzt

1

1

0

0

aber es soll in den stall

└─ [REF] soll [in LOC]

es (in) den stall

— aber

3

1

1

1

passt das da rein  
└─ passt das da rein

|   |   |   |   |
|---|---|---|---|
| 0 | 0 | 0 | 0 |
|---|---|---|---|

da hat das sachen verloren  
└─ da hat [REF] [REF] [PRO]  
das sachen verloren

|   |   |   |   |
|---|---|---|---|
| 3 | 0 | 3 | 0 |
|---|---|---|---|

und jetzt ist es so  
└─ jetzt ist es [adv]  
so  
— und

|   |   |   |   |
|---|---|---|---|
| 2 | 0 | 1 | 1 |
|---|---|---|---|

das steht so in dem stall  
└─ das steht [adv] [LOC]  
so -in dem stall-

|   |   |   |   |
|---|---|---|---|
| 2 | 0 | 2 | 0 |
|---|---|---|---|

da ist das aua  
└─ da ist das [REF]  
aua

|   |   |   |   |
|---|---|---|---|
| 1 | 0 | 1 | 0 |
|---|---|---|---|

das ist hier in der ritze rein  
 └─ [REF] [PRO] [LOC] rein  
   -das ist-  
   └─ hier in der [REF]  
       ritze

3 0 3 0

da kann es gleich sich drauflegen  
 └─ sich [PRO]  
   drauflegen  
 ─ FAILED to trace 'da kann es gleich' (ADD not allowed)

- - - -

dann baue ich es hier fest  
 └─ [adv PRO] ich [REF] [LOC] [PRO]  
   dann baue (ich) es hier fest

4 1 3 0

das kann ich hier drauflegen  
 └─ [REF] [PRO] ich hier [PRO]  
   das kann (ich) drauflegen

2 0 2 0

und dann kommt der tierarzt  
 └─ und dann kommt [REF]  
       -der tierarzt-

1 0 1 0

das pferd das muss jetzt bei dem tierarzt sein  
 └─ bei dem [REF] [PRO]  
   └─ [REF] sein  
     tierarzt  
 ── FAILED to trace 'das pferd das muss jetzt' (ADD not allowed)

muss jetzt zum tierarzt gehen  
 └─ [PRO adv] zum [REF] gehen  
   -muss jetzt- tierarzt

hänge ich die sachen hin  
 └─ [PRO] ich die [REF] [PRO]  
   hänge  
   └─ [REF] hin  
     sachen

und ich hänge da die sachen hin  
 └─ ich [PRO] da [REF] [PRO]  
   hänge  
   └─ (da) die [REF] [PRO]  
     └─ [REF] hin  
       sachen

─ und

|   |   |   |   |
|---|---|---|---|
| - | - | - | - |
| 2 | 0 | 2 | 0 |
| 3 | 0 | 3 | 0 |
| 5 | 1 | 3 | 1 |

da habe ich das hingehängt  
 └─ da habe ich das [PRO]  
     hingehängt

1                      0                      1                      0

wenn es kalt wird  
 └─ wenn es [ATT] [PRO]  
     -kalt wird-

1                      0                      1                      0

wenn das alles kalt wird in der jacke  
 └─ in der [REF]  
     jacke  
 ── FAILED to trace 'wenn das alles kalt wird' (ADD not allowed)

-                      -                      -                      -

ich hänge das an die seite  
 └─ [REF] [PRO] [REF] an die seite  
     -ich hänge das-

1                      0                      1                      0

wo das pferd gerade gelegen hat  
 └─ [REF] das pferd [PRO] [PRO]  
     wo (das)  
     └─ [PRO] hat  
         └─ gerade [PRO]  
             gelegen

4                      2                      2                      0

und gleich kommt der tierarzt

└─ kommt der [REF]  
    (der) tierarzt  
└─ und [adv]  
    gleich

|   |   |   |   |
|---|---|---|---|
| 3 | 1 | 1 | 1 |
|---|---|---|---|

das tut nicht weh

└─ das tut [adv PRO]  
    -nicht weh-

|   |   |   |   |
|---|---|---|---|
| 1 | 0 | 1 | 0 |
|---|---|---|---|

da musst du dich mal hier unten hinlegen

└─ mal hier [LOC PRO]  
    └─ unten [PRO]  
        hinlegen

— FAILED to trace 'da musst du dich' (ADD not allowed)

|   |   |   |   |
|---|---|---|---|
| - | - | - | - |
|---|---|---|---|

und da schlafen so

└─ und da [PRO adv]  
    -schlafen so-

|   |   |   |   |
|---|---|---|---|
| 1 | 0 | 1 | 0 |
|---|---|---|---|

der hat kein mittag gegessen  
 └─ der hat [REF PRO]  
   └─ kein [REF PRO]  
     -mittag gegessen-

|   |   |   |   |
|---|---|---|---|
| 2 | 0 | 2 | 0 |
|---|---|---|---|

da war er schon bei den schweinen  
 └─ bei den [REF]  
     (den) schweinen  
 ── FAILED to trace 'da war er schon' (ADD not allowed)

|   |   |   |   |
|---|---|---|---|
| - | - | - | - |
|---|---|---|---|

und der hat igittigitt@o gesagt  
 └─ der hat[on] gesagt  
     igittigitt@o  
 ── und

|   |   |   |   |
|---|---|---|---|
| 2 | 0 | 1 | 1 |
|---|---|---|---|

die waren auch igittigitt@o  
 └─ [REF] waren auch  
     die (waren)  
 ── igittigitt@o

|   |   |   |   |
|---|---|---|---|
| 2 | 1 | 0 | 1 |
|---|---|---|---|

mit ludger und susanne waren die hier

└─ [REF] und [REF PRO]

└─ [REF] waren

susanne

— FAILED to trace 'die hier' (ADD not allowed)

— FAILED to trace 'mit' (ADD not allowed)

— FAILED to trace 'ludger'

- - - -

ich habe das pferd wieder umgezogen

└─ [REF] [PRO] das pferd

ich habe (das)

— FAILED to trace 'wieder umgezogen' (ADD not allowed)

- - - -

und die pferde

└─ und die [REF]

(die) pferde

1 1 0 0

ui@o da ist die mauer

└─ [on] da ist die [REF]

ui@o (da (die) mauer

2 2 0 0

wir bauen einen stall hier hin  
 └─ [REF] [PRO] einen stall  
     wir bauen (einen)  
 ── FAILED to trace 'hier hin' (ADD not allowed)

damit das pferd nicht rausläuft  
 └─ damit [REF] nicht [PRO]  
     -das Pferd-    rausläuft

ich baue das hier hin  
 └─ ich [PRO] [REF] [LOC] [PRO]  
     - (ich) baue das-    -hier hin-

das macht eine pause  
 └─ das macht [REF]  
     eine pause

da ist auch die tierarztgiraffe  
 └─ da ist auch [REF]  
     └─ die [REF]  
         tierarztgiraffe

|   |   |   |   |
|---|---|---|---|
| - | - | - | - |
| 2 | 0 | 2 | 0 |
| 2 | 1 | 1 | 0 |
| 1 | 0 | 1 | 0 |
| 2 | 0 | 2 | 0 |

da legt es sich oben hin  
 └─ da [PRO] es sich  
   legt  
 ── FAILED to trace 'oben hin' (ADD not allowed)

und dann ziehe ich die sachen aus  
 └─ dann [PRO] [REF] [REF] [PRO]  
   -ziehe ich- -die sachen- aus  
 ── und

und hänge die hier an den haken hin  
 └─ an den [REF] [PRO]  
   └─ [REF] hin  
 ── FAILED to trace 'und hänge die hier' (ADD not allowed)  
 ── FAILED to trace 'haken'

das da gerade ist der haken  
 └─ ist der [REF]  
 ── FAILED to trace 'das da gerade' (ADD not allowed)  
 ── FAILED to trace 'haken'

da ist die wanne  
 └─ da ist die [REF]  
   (die) wanne

|   |   |   |   |   |
|---|---|---|---|---|
| - | - | - | - |   |
|   | 4 | 0 | 3 | 1 |
| - | - | - | - |   |
| - | - | - | - |   |
| 1 | 1 | 0 | 0 |   |

und da ist der haken  
 └─ und da ist der [REF]  
     (der) haken

|   |   |   |   |
|---|---|---|---|
| 1 | 1 | 0 | 0 |
|---|---|---|---|

und ich hänge hier gut die sachen hin  
 └─ ich [PRO]  
     hänge  
     └─ die [REF] [PRO]  
         └─ [REF] hin  
             sachen

— und  
 — FAILED to trace 'hier gut' (ADD not allowed)

|   |   |   |   |
|---|---|---|---|
| - | - | - | - |
|---|---|---|---|

ich lege die hin  
 └─ [REF] [PRO] die hin  
     ich lege (die)

|   |   |   |   |
|---|---|---|---|
| 1 | 1 | 0 | 0 |
|---|---|---|---|

und da lege ich das pferd drauf  
 └─ und da [PRO] [REF] [REF] drauf  
     └─ [PRO [REF] das pferd  
         lege ich (das)

|   |   |   |   |
|---|---|---|---|
| 2 | 1 | 1 | 0 |
|---|---|---|---|

und hier hängen die sachen  
 └─ und hier [PRO] [REF]  
     hängen -die sachen-

2                      0                      2                      0

und dann geht die tierarztgiraffe hoch  
 └─ dann [PRO] [REF] [PRO]  
     geht -die Tierarztgiraffe- hoch  
 — und

4                      0                      3                      1

die kinderärztin hat wieder einen behandlungstisch  
 └─ [REF] hat wieder [REF]  
     die kinderärztin  
     └─ einen [REF]  
         behandlungstisch

3                      0                      3                      0

der ist runtergefallen  
 └─ der ist [PRO]  
     (ist) runtergefallen

1                      1                      0                      0

der hat rüsselitis@f  
 └─ der hat [REF]  
     rüsselitis@f'

|   |   |   |   |
|---|---|---|---|
| 1 | 0 | 1 | 0 |
|---|---|---|---|

der zieht das gleich an  
 └─ [REF] [PRO] das gleich [PRO]  
     -der zieht-      (gleich) an

|   |   |   |   |
|---|---|---|---|
| 2 | 0 | 2 | 0 |
|---|---|---|---|

der kleine elefant hat keine erkältung  
 └─ [REF] hat keine [REF]  
     der kleine elefant   erkältung

|   |   |   |   |
|---|---|---|---|
| 2 | 0 | 2 | 0 |
|---|---|---|---|

nein der zieht das verband an  
 └─ [co REF] [PRO] das [REF] [PRO]  
     └─ nein der [PRO]  
         (der) zieht  
     └─ verband [PRO]  
         an

|   |   |   |   |
|---|---|---|---|
| 4 | 1 | 3 | 0 |
|---|---|---|---|

der ist ganz krank geworden  
 └─ [REF] [PRO] [ATT] geworden  
   └─ der ist ganz [ATT]  
     krank

2 0 2 0

da kann gleich das pferd in den zaun reingehen  
 └─ [LOC] [PRO] das pferd [LOC] [PRO]  
   └─ [LOC] reingehen  
     in den zaun  
   └─ da kann [adv]  
     gleich

4 0 4 0

wo ist der elefant hin  
 └─ [REF] [PRO] der elefant [adv]  
     wo ist (der) hin

2 2 0 0

wo legt der sich hin  
 └─ [REF] [PRO] der sich [PRO]  
     (sich) hin  
   └─ wo [PRO]  
     legt

3 2 1 0

jetzt einmal aufmachen  
└─ [adv adv] aufmachen  
jetzt einmal

|   |   |   |   |
|---|---|---|---|
| 1 | 0 | 1 | 0 |
|---|---|---|---|

hier ist futter auch  
└─ hier ist [REF adv]  
└─ [REF] auch  
futter

|   |   |   |   |
|---|---|---|---|
| 2 | 0 | 2 | 0 |
|---|---|---|---|

ich mache hier zu  
└─ ich [PRO] [LOC] [PRO]  
(ich) mache hier zu

|   |   |   |   |
|---|---|---|---|
| 3 | 1 | 2 | 0 |
|---|---|---|---|

wo ist die giraffe  
└─ wo ist die giraffe

|   |   |   |   |
|---|---|---|---|
| 0 | 0 | 0 | 0 |
|---|---|---|---|

wo ist der tierarzt  
└─ wo ist der [REF]  
tierarzt

|   |   |   |   |
|---|---|---|---|
| 1 | 0 | 1 | 0 |
|---|---|---|---|

das will nicht gestreichelt werden  
 └─ [REF] will nicht [PRO]  
     das (will)  
     └─ [PRO] werden  
        gestreichelt

|                        |   |   |   |   |
|------------------------|---|---|---|---|
|                        | 3 | 2 | 1 | 0 |
| die waren beim friseur |   |   |   |   |
| └─ die waren [LOC]     |   |   |   |   |
| beim friseur           |   |   |   |   |

|                            |   |   |   |   |
|----------------------------|---|---|---|---|
|                            | 1 | 0 | 1 | 0 |
| das sitzt jetzt im stall   |   |   |   |   |
| └─ [REF] [PRO] jetzt [LOC] |   |   |   |   |
| -das  sitzt-               |   |   |   |   |
| └─  jetzt im [LOC]         |   |   |   |   |
| stall                      |   |   |   |   |

|                           |   |   |   |   |
|---------------------------|---|---|---|---|
|                           | 3 | 1 | 2 | 0 |
| und das ist ganz nackig   |   |   |   |   |
| └─ und das ist ganz [ATT] |   |   |   |   |
| (ganz) nackig             |   |   |   |   |

|                 |   |   |   |   |
|-----------------|---|---|---|---|
|                 | 1 | 1 | 0 | 0 |
| los fahrt es    |   |   |   |   |
| └─ los [PRO] es |   |   |   |   |
| fahrt           |   |   |   |   |

|  |   |   |   |   |
|--|---|---|---|---|
|  | 1 | 0 | 1 | 0 |
|--|---|---|---|---|

hier dran ist noch die mauer  
 └─ [LOC] ist noch [REF]  
     hier dran      die mauer

2                      0                      2                      0

unten dran ist noch die mauer  
 └─ [LOC] ist noch [REF]  
                                  die mauer  
 └─ [LOC] dran  
     unten

3                      0                      3                      0

da steht das schaf drin  
 └─ [LOC] [PRO] [REF] drin  
     └─ da steht das [REF]  
             (das) schaf

2                      1                      1                      0

das ist ganz nackig das schaf  
 └─ das ist ganz [ATT] [REF]  
                                  nackig -das schaf-

2                      0                      2                      0

das hat ja kein fell mehr  
 └─ das hat ja [REF]  
     kein Fell  
 ── mehr

2 0 1 1

wo ist der schäfer  
 └─ wo ist der [REF]  
     (der) schäfer

1 1 0 0

erst hole ich das mal raus  
 └─ [adv] [PRO] [REF] das [adv] [PRO]  
     erst hole  
         └─ ich das mal [PRO]  
             raus

4 1 3 0

jetzt kommt es hier hin  
 └─ jetzt kommt es  
 ── FAILED to trace 'hier hin' (ADD not allowed)

- - - -

jetzt kommt das hier hin  
 └─ [adv] kommt das  
     jetzt (kommt)  
 ── FAILED to trace 'hier hin' (ADD not allowed)

- - - -

wir haben noch hier ein schaf  
 └─ hier ein [REF]  
     (ein) schaf  
 — FAILED to trace 'wir haben noch' (ADD not allowed)

noch ein schwein haben wir dabei  
 └─ [adv REF] haben wir [adv]  
     noch ein schwein      dabei

das gummi hier weg  
 └─ [REF] hier [PRO]  
     das gummi    weg

das gummi oder das schaf  
 └─ [REF] oder das [REF]  
     das gummi    (das) schaf

den stift ich stelle den mal dahin  
 └─ [REF] [REF] [PRO] den mal [LOC]  
     den                    (mal) dahin  
     └─ stift ich [PRO]  
         (ich) stelle

|   |   |   |   |
|---|---|---|---|
| - | - | - | - |
| 2 | 0 | 2 | 0 |
| 2 | 0 | 2 | 0 |
| 2 | 2 | 0 | 0 |
| 4 | 3 | 1 | 0 |

in die nähe muss es gehen  
└─ in die [REF PRO REF PRO]  
    nähe muss es gehen

|   |   |   |   |
|---|---|---|---|
| 3 | 0 | 3 | 0 |
|---|---|---|---|

wo ist das andere  
└─ [REF] ist das andere  
    wo

|   |   |   |   |
|---|---|---|---|
| 1 | 0 | 1 | 0 |
|---|---|---|---|

das hier sind zwei schweine  
└─ das hier sind [REF]  
    └─ zwei [REF]  
        schweine

|   |   |   |   |
|---|---|---|---|
| 2 | 0 | 2 | 0 |
|---|---|---|---|

und das sind schafe  
└─ und das sind [REF]  
    schafe

|   |   |   |   |
|---|---|---|---|
| 1 | 0 | 1 | 0 |
|---|---|---|---|

wo ist das pony  
└─ wo ist das [REF]  
    pony

|   |   |   |   |
|---|---|---|---|
| 1 | 0 | 1 | 0 |
|---|---|---|---|

fiene nein du darfst den pony nicht

└─ nein du [PRO] [REF] nicht

└─ [PRO] den [REF]

darfst pony

— FAILED to trace 'fiene'

und die müssen einen platz machen

└─ und die müssen [REF] [PRO]

-einen Platz- machen

— und

alle auf die wiese

└─ [REF] auf die [REF]

alle (auf) (die) wiese

da kommt noch mehr zaun hin

└─ da [PRO] [adv] [adv] [REF] [PRO]

(da) kommt

└─ noch mehr Zaun [PRO]

hin

der steht neben dem baum

└─ der [PRO] [LOC]

(der) steht

└─ neben dem [REF]

(dem) baum

-

-

-

-

3

0

2

1

2

2

0

0

3

1

2

0

3

2

1

0

das ist der fuchs  
 └─ das ist der [REF]  
     (der) fuchs

1 1 0 0

fuchs isst eine eichel  
 └─ [REF] isst [REF]  
     fuchs eine eichel

2 0 2 0

eichhörnchen und die eule sitzt im baum  
 └─ [REF] und die [REF] [PRO] [LOC]  
     eichhörnchen  
     └─ [REF] sitzt im [REF]  
         eule (im) baum

4 1 3 0

eule die sitzt in dem baum  
 └─ [REF] die sitzt [LOC]  
     eule (die) in dem baum

2 0 2 0

da ist ein loch reingebissen  
 └─ da ist ein loch  
 ── FAILED to trace 'reingebissen' (ADD not allowed)

- - - -

ist der da  
└─ ist der da

|   |   |   |   |
|---|---|---|---|
| 0 | 0 | 0 | 0 |
|---|---|---|---|

der hier passt  
└─ der hier [PRO]  
    (hier) passt

|   |   |   |   |
|---|---|---|---|
| 1 | 1 | 0 | 0 |
|---|---|---|---|

da ist das eichhörnchen  
└─ da ist das [REF]  
    (das) eichhörnchen

|   |   |   |   |
|---|---|---|---|
| 1 | 1 | 0 | 0 |
|---|---|---|---|

setze ich mal hier rein  
└─ [PRO] ich mal [LOC] [PRO]  
    setze (ich)    hier rein

|   |   |   |   |
|---|---|---|---|
| 2 | 2 | 0 | 0 |
|---|---|---|---|

hier steht die eule  
└─ [LOC] steht die [REF]  
    hier (steht) (die) eule

|   |   |   |   |
|---|---|---|---|
| 2 | 2 | 0 | 0 |
|---|---|---|---|

einmal kurz platz machen

└─ [ATT] platz machen

└─ [adv] kurz

einmal

2 0 2 0

hier sind ganz viele pferde

└─ [LOC] sind ganz viele [REF]

hier (sind) (viele) pferde

2 2 0 0

da ist eins zwei drei vier fünf sechs sieben pferde

└─ da ist [REF]

-eins zwei drei vier fünf sechs sieben- Pferde

2 0 2 0

da muss das eichhörnchen bisschen aufpassen

└─ [LOC] [PRO] das eichhörnchen [REF] [PRO]

da muss (das) bisschen aufpassen

2 2 0 0

eins zwei drei

└─ eins zwei drei

0 0 0 0

das ist zwei drei vier fünf sechs sieben  
└─ das ist [ATT]  
-zwei drei vier fünf sechs sieben-

|                                                        |   |   |   |   |
|--------------------------------------------------------|---|---|---|---|
|                                                        | 1 | 0 | 1 | 0 |
| und das ist die kuh<br>└─ und das ist die [REF]<br>kuh |   |   |   |   |

|                                                      |   |   |   |   |
|------------------------------------------------------|---|---|---|---|
|                                                      | 1 | 0 | 1 | 0 |
| da ist nur die kuh<br>└─ da ist nur [REF]<br>die kuh |   |   |   |   |

|                                                            |   |   |   |   |
|------------------------------------------------------------|---|---|---|---|
|                                                            | 1 | 0 | 1 | 0 |
| und die beiden pferde<br>└─ und die beiden [REF]<br>pferde |   |   |   |   |

|                                                                                    |   |   |   |   |
|------------------------------------------------------------------------------------|---|---|---|---|
|                                                                                    | 1 | 0 | 1 | 0 |
| die beiden pferde sind hier<br>└─ [REF] sind hier<br>└─ die beiden [REF]<br>pferde |   |   |   |   |

|  |   |   |   |   |
|--|---|---|---|---|
|  | 2 | 0 | 2 | 0 |
|--|---|---|---|---|

und eine kuh

└─ und eine [REF]  
    (eine) kuh

|   |   |   |   |
|---|---|---|---|
| 1 | 1 | 0 | 0 |
|---|---|---|---|

da muss das eichhörnchen mal aufpassen

└─ [LOC PRO] das eichhörnchen [PRO]  
    da muss (das)  
    └─ mal [PRO]  
        aufpassen

|   |   |   |   |
|---|---|---|---|
| 3 | 0 | 3 | 0 |
|---|---|---|---|

ich will hier noch ein zaun hinstellen

└─ hier noch ein [REF] [PRO]  
    └─ zaun [PRO]  
        hinstellen

— FAILED to trace 'ich will' (ADD not allowed)

|   |   |   |   |
|---|---|---|---|
| - | - | - | - |
|---|---|---|---|

hier ist der zaun

└─ hier ist der [REF]  
    (der) zaun

|   |   |   |   |
|---|---|---|---|
| 1 | 1 | 0 | 0 |
|---|---|---|---|

sind beide zäune

└─ sind beide [REF]  
    zäune

|   |   |   |   |
|---|---|---|---|
| 1 | 0 | 1 | 0 |
|---|---|---|---|

und da laufen die tiere nicht raus  
 └─ und da [PRO] [REF] adv [PRO]  
     nicht raus  
     └─ [PRO] die tiere  
        laufen (die)

3                      1                      2                      0

und hier ist ein ding  
 └─ hier ist ein [REF]  
     (ein) ding  
 ── und

2                      1                      0                      1

wo die tiere nicht rauslaufen  
 └─ wo die [REF] [PRO]  
     └─ tiere [PRO]  
        nicht rauslaufen

2                      0                      2                      0

die sind ein bisschen rausgelaufen  
 └─ [REF] [PRO] ein bisschen [PRO]  
     -die sind-                      rausgelaufen

2                      0                      2                      0

die beiden pferden  
 └─ die beiden [REF]  
     pferden

1                      0                      1                      0

eins zwei drei drei vier fünf  
 └─ eins zwei drei [ATT] [ATT]  
     (drei) vier fünf

1                      0                      1                      0

und da muss das eichhörnchen aufpassen  
 └─ da muss [REF] [PRO]  
     └─ das Eichhörnchen [PRO]  
                 aufpassen  
 ── und

3                      0                      2                      1

die will nicht aufpassen  
 └─ [REF] will nicht [PRO]  
     die (will)      aufpassen

2                      1                      1                      0

das eichhörnchen passt da auf  
 └─ [REF] passt da [PRO]  
 das eichhörnchen (da) auf

2                      0                      2                      0

wo die kuh ganz hinten weit steht  
 └─ [REF] die kuh  
     wo (die)  
 ── FAILED to trace 'ganz hinten weit steht' (ADD not allowed)

-                      -                      -                      -

die geht mal da raus  
 └─ [REF] [PRO] mal da [PRO]  
     die geht      (da) raus

2                      2                      0                      0

hier aus dem stall  
 └─ hier aus dem [REF]  
     stall

1                      0                      1                      0

die geht mal da raus aus dem stall  
 └─ da raus aus dem [REF]  
     stall  
 — FAILED to trace 'die geht mal' (ADD not allowed)

-                      -                      -                      -

die geht in den anderen stall  
 └─ die [PRO] in [REF]  
     geht  
     └─ in den anderen [REF]  
         stall

3                      1                      2                      0

und zwei leute die gehen jetzt alle raus  
 └─ jetzt alle [PRO]  
     (alle) raus  
 — FAILED to trace 'und zwei leute die gehen' (ADD not allowed)

-                      -                      -                      -

da wollen die halt hier rein  
 └─ da [PRO] [REF] [adv] [LOC] [PRO]  
     -wollen die- halt -hier rein-

3 0 3 0

da ist noch ein\_bisschen platz  
 └─ da ist [adv] [adv] platz  
     -noch ein\_bisschen (Platz)-

1 1 0 0

da darf der hin  
 └─ [LOC] darf der [PRO]  
     da (darf) (der) hin

2 2 0 0

die ganzen tieren  
 └─ die ganzen [REF]  
     tieren

1 0 1 0

der sitzt da vielleicht obendrauf  
 └─ der sitzt da [adv] [LOC]  
     vielleicht obendrauf

2 0 2 0

da sitzt er der kleine braunbär  
 └─ [LOC] [PRO] er der [REF]  
   da sitzt (er) (der) kleine braunbär

2 2 0 0

ich stelle das pony drauf  
 └─ [REF] [PRO] das pony [PRO]  
   ich stelle (das) drauf

2 0 2 0

damit giraffe hier drin stehen kann  
 └─ FAILED to trace 'damit giraffe hier' (ADD not allowed)  
 └─ drin stehen [PRO]  
   (stehen) kann

- - - -

hier ist der braunbär  
 └─ hier ist der [REF]  
   (der) braunbär

1 1 0 0

und die anderen tiere die sollen nicht da sein  
 └─ nicht da [PRO]  
   sein  
 └─ FAILED to trace 'und die anderen tiere die sollen' (ADD not allowed)

- - - -

und da ist hier die kuh drin  
 └─ ist hier [REF] drin  
     die kuh  
 ── FAILED to trace 'und da' (ADD not allowed)

die möchte nicht in den stall  
 └─ [REF] [PRO] nicht [LOC]  
   -die möchte-  
     └─ nicht in den [REF]  
        stall

die möchte in den zaun  
 └─ die [PRO] [LOC]  
     möchte -in den Zaun-

und das eichhörnchen möchte aufpassen  
 └─ und das [REF] [PRO]  
   └─ [REF] möchte [PRO]  
     eichhörnchen aufpassen  
 ── und

das eichhörnchen hatte aufgepasst  
 └─ das eichhörnchen [PRO]  
     hatte aufgepasst

|   |   |   |   |
|---|---|---|---|
| - | - | - | - |
| 3 | 1 | 2 | 0 |
| 2 | 0 | 2 | 0 |
| 3 | 0 | 2 | 1 |
| 2 | 0 | 2 | 0 |

das musste aufpassen  
 └─ das [PRO] aufpassen  
     musste

1                      0                      1                      0

jetzt will die kuh wieder raus  
 └─ wieder raus  
 — FAILED to trace 'jetzt will die kuh' (ADD not allowed)

und die kuh geht wieder in den anderen stall  
 └─ [REF] [PRO] [adv] in den [REF]  
     -die Kuh- geht wieder  
         └─ in den anderen [REF]  
             (anderen) stall  
 — und

-                      -                      -                      -

6                      2                      3                      1

und das eichhörnchen ist rausgefallen  
 └─ und das [REF] [PRO]  
     └─ [REF] ist rausgefallen  
       eichhörnchen

2                      0                      2                      0

der muss jetzt zum tierarzt gehen  
 └─ [REF] [PRO] [adv] zum (Tier)arzt gehen  
 └─ [REF] muss jetzt  
     der (muss)

2                      1                      1                      0

da liegt das eichhörnchen  
 └─ da liegt das [REF]  
     (das) eichhörnchen

1 1 0 0

das kann nicht so gut klettern  
 └─ [REF] [PRO] nicht so gut [PRO]  
     das kann (nicht) klettern

2 2 0 0

ich habe etwas gefunden hier  
 └─ [REF] [PRO] [REF] [PRO] hier  
   └─ [REF] [PRO] [REF] gefunden  
     ich habe etwas

2 0 2 0

das habe ich  
 └─ das habe ich

0 0 0 0

da kann es besser im baum sitzen  
 └─ da kann [REF] [ATT] [LOC] [PRO]  
     es  
   └─ besser im [REF] [PRO]  
     baum sitzen

4 0 4 0

das ist von dem baum gestürzt

└─ [REF] ist [LOC] [PRO]

das (ist) -von dem baum- gestürzt

3

1

2

0

und dann habe ich es da draufgelegt

└─ es da [PRO]

— FAILED to trace 'draufgelegt'

— FAILED to trace 'und dann habe ich' (ADD not allowed)

-

-

-

-

und dann kam der tierarzt

└─ und dann [PRO] [REF]

└─ [PRO] der tierarzt

kam (der)

2

1

1

0

und hat geguckt ob es in ordnung ist

└─ ob es [LOC] [PRO]

└─ in [REF] ist

— FAILED to trace 'ordnung'

— FAILED to trace 'und hat geguckt' (ADD not allowed)

-

-

-

-

so komisch ist das band  
 └── [ATT] ist das [REF]  
 - so komisch- band

2 0 2 0

das eichhörnchen ist wieder aus dem baum gestürzt  
 └── [REF] [PRO] [adv] aus dem baum gestürzt  
 └── [REF] ist wieder  
 -das eichhörnchen-

2 0 2 0

na\_klar hier habe ich das hingehängt  
 └── [LOC] habe ich das [PRO]  
 hier (habe ich) hingehängt  
 — na\_klar

3 1 1 1

wenn er besser gucken kann  
 └── [conj] [REF] [ATT] [PRO] kann  
 -wenn er- besser gucken (kann)

3 1 2 0

da liegt die jacke  
 └── da liegt die [REF]  
 jacke

1 0 1 0

da ist die jacke

└─ da ist die [REF]  
jacke

|   |   |   |   |
|---|---|---|---|
| 1 | 0 | 1 | 0 |
|---|---|---|---|

die suchen mal eicheln

└─ [REF] [PRO] mal [REF]  
die suchen eicheln

|   |   |   |   |
|---|---|---|---|
| 2 | 0 | 2 | 0 |
|---|---|---|---|

da habe ich gegengefallen

└─ da [PRO] [REF] [PRO]  
-(da) habe ich- gegengefallen

|   |   |   |   |
|---|---|---|---|
| 2 | 1 | 1 | 0 |
|---|---|---|---|

aber die jacke ausziehen

└─ aber die [REF] [PRO]  
└─ [REF] ausziehen  
jacke

|   |   |   |   |
|---|---|---|---|
| 2 | 0 | 2 | 0 |
|---|---|---|---|

das hänge ich jetzt zu dem kinderarzt  
 └─ das [PRO] ich [adv] [LOC]  
     hänge     jetzt   -zum Kinderarzt-

3                   0                   3                   0

hier bleibt die hängen  
 └─ [LOC] bleibt die [PRO]  
     hier           hängen

2                   0                   2                   0

bei dem kinderarzt bleibt die hängen  
 └─ bei dem [REF] [PRO] [REF] [PRO]  
     kinderarzt  
     └─ bleibt die [PRO]  
         hängen

3                   0                   3                   0

hier steht die  
 └─ [LOC] steht die  
     hier (steht)

1                   1                   0                   0

ja die können hier jetzt wieder reingehen  
 └─ jetzt wieder [PRO]  
     reingehen  
 — FAILED to trace 'ja die können hier' (ADD not allowed)

-                   -                   -                   -

das eichhörnchens jacke  
 └─ das [REF] jacke  
   eichhörnchens

1                    0                    1                    0

eine neue jacke für das  
 └─ [REF] für das  
   └─ eine neue [REF]  
     jacke

2                    0                    2                    0

ziehen wir die an  
 └─ [PRO] wir die [PRO]  
   ziehen (wir) (die) an

2                    2                    0                    0

die hat im büro gehangen  
 └─ im büro  
 ── FAILED to trace 'die hat' (ADD not allowed)  
 ── FAILED to trace 'gehangen' (ADD not allowed)

-                    -                    -                    -

da hat die gehangen  
 └─ da hat die [PRO]  
   gehangen

1                    0                    1                    0

da habe ich gesessen  
 └─ da [PRO] [REF] [PRO]  
   -(da) habe ich- gesessen

2 1 1 0

und da hinten hing die jacke von dem eichhörnchen  
 └─ [conj] [LOC] [PRO] die [REF]  
   und da hinten jacke  
 — FAILED to trace 'von dem eichhörnchen' (ADD not allowed)  
 — FAILED to trace 'hing'

- - - -

meine jacken hängen hier  
 └─ [REF] [PRO] hier  
   └─ meine [REF] [PRO]  
     └─ [REF] hängen  
       jacken

3 0 3 0

das ist nicht eichhörnchens jacke  
 └─ das ist nicht [REF]  
   └─ [REF] jacke  
     eichhörnchens

2 0 2 0

da hat eichhörchens jacke gehangen

└─ da hat [REF] [REF] [PRO]

gehangen

└─ [REF] jacke

eichhörchens

3

0

3

0

und da habe ich das pferd abgezogen

└─ da habe ich [REF] [PRO]

└─ das Pferd [PRO]

abgezogen

— und

3

0

2

1

hier oben hier

└─ hier oben [LOC]

hier

1

0

1

0

da oben ist die waschmaschine

└─ da oben ist [REF]

die waschmaschine

1

0

1

0

die jacke ist noch neu

└─ [REF] ist noch [ATT]

-die jacke- neu

2

0

2

0

und hier ist die andere jacke drin

└─ [LOC] ist [REF] drin

└─ hier ist [REF]

-die andere Jacke-

— und

3

1

1

1

die ist auch dreckig geworden

└─ [REF] ist [adv] [ATT] geworden

-die (ist) auch- dreckig

2

0

2

0

die ist noch auch dreckig

└─ die ist noch [ATT]

└─ auch [ATT]

dreckig

2

0

2

0

die andere in die waschmaschine

└─ [REF] in die [REF]

-die andere- (die) waschmaschine

2

1

1

0

muss das eichhörnchen die jacke anziehen

└─ [PRO] [REF] [REF] anziehen

muss das eichhörnchen die jacke

3

0

3

0

da kommen die arme durch  
 └─ da kommen die [REF PRO]  
 └─ [REF] durch  
 arme

2 0 2 0

hier ist ein pferd  
 └─ hier ist ein [REF]  
 pferd

1 0 1 0

da ist ein pferd  
 └─ da ist ein pferd

0 0 0 0

guck mal da ist das dreckig  
 └─ guck mal da ist das  
 — FAILED to trace 'dreckig' (ADD not allowed)

- - - -

ich habe die jacke gewaschen  
 └─ ich habe die [REF] [PRO]  
 └─ [REF] gewaschen  
 jacke

2 0 2 0

aber jetzt ist die schon wieder trocken

└─ ist die schon [ATT]

└─ wieder [ATT]

trocken

— aber jetzt

3

0

2

1

da geht er nicht hin

└─ [LOC PRO] er nicht [PRO]

da geht (nicht) hin

2

1

1

0

hier geht er rein

└─ [LOC PRO] er rein

hier geht

1

0

1

0

das ist vorher runtergesprungen

└─ das ist [adv PRO]

└─ vorher [PRO]

runtergesprungen

2

0

2

0

wir haben wieder stopp gedrückt  
 └─ [REF] [PRO] wieder [REF] [PRO]  
   wir haben  
   └─ stopp [PRO]  
      gedrückt

3 0 3 0

bei dem rechner  
 └─ bei dem [REF]  
   (dem) rechner

1 1 0 0

und dann die ganzen tiere rausgefallen  
 └─ die ganzen [REF] [PRO]  
   └─ tiere [PRO]  
      rausgefallen  
 ── und dann

3 0 2 1

ja da ist die dreckige jacke  
 └─ [co] da ist die [REF]  
   └─ dreckige [REF]  
      jacke  
 ── ja

3 0 3 0

die muss da in die waschmaschine rein

└─ [REF] [PRO] da [LOC] [DIR]

-die muss-

└─ in die [REF] rein

(die) Waschmaschine

3

1

2

0

ich mache die beiden waschmaschinen mal zu

└─ ich [PRO] [REF] mal [PRO]

(ich) mache zu

└─ die beiden [REF]

Waschmaschinen

4

0

4

0

und jetzt kommt sie raus

└─ jetzt kommt [REF] raus

sie

— und

2

0

1

1

baue ich gerade

└─ [PRO] ich gerade

baue (ich)

1

1

0

0

auf so ein ding habe ich mich gesetzt

└─ habe ich mich [PRO]

gesetzt

— FAILED to trace 'auf so ein ding' (ADD not allowed)

-

-

-

-

und hier ist noch frei  
 └─ und hier ist noch [ATT]  
     frei

1                      0                      1                      0

aber du musst in den stall der elefant  
 └─ [conj] du musst [LOC] [REF]  
     aber (du)    in den stall    der elefant

3                      0                      3                      0

das ist hier doch nicht warm  
 └─ doch nicht [ATT]  
     warm  
 — FAILED to trace 'das ist hier' (ADD not allowed)

-                      -                      -                      -

da sind so warme bäume am stall  
 └─ da sind so [REF] [LOC]  
   └─ [REF] am [REF]  
       stall  
   └─ warme [REF]  
       bäume

4                      0                      4                      0

an einem baum kann man dran klettern  
 └─ [LOC] kann man [LOC] [PRO]  
   └─ [prep] einem baum  
       an (einem)  
   └─ dran [PRO]  
       klettern

4                      1                      3                      0

ich lege sie alle um  
 └─ ich [PRO] [REF] [PRO]  
 (ich) lege -sie alle- um

|                                                               |   |   |   |   |
|---------------------------------------------------------------|---|---|---|---|
|                                                               | 3 | 1 | 2 | 0 |
| die kommen jetzt gleich wieder da rein                        |   |   |   |   |
| └─ wieder da [PRO]                                            |   |   |   |   |
| (da) rein                                                     |   |   |   |   |
| — FAILED to trace 'die kommen jetzt gleich' (ADD not allowed) |   |   |   |   |

|                                                           |   |   |   |   |
|-----------------------------------------------------------|---|---|---|---|
|                                                           | - | - | - | - |
| und dann kommen die nachher wieder raus                   |   |   |   |   |
| └─ [adv] wieder raus                                      |   |   |   |   |
| nachher (wieder)                                          |   |   |   |   |
| — FAILED to trace 'und dann kommen die' (ADD not allowed) |   |   |   |   |

|                 |   |   |   |   |
|-----------------|---|---|---|---|
|                 | - | - | - | - |
| in den stall    |   |   |   |   |
| └─ in den stall |   |   |   |   |

|                           |   |   |   |   |
|---------------------------|---|---|---|---|
|                           | 0 | 0 | 0 | 0 |
| wo kein heu drin liegt    |   |   |   |   |
| └─ [REF] [REF] drin [PRO] |   |   |   |   |
| liegt                     |   |   |   |   |
| └─ wo kein [REF]          |   |   |   |   |
| heu                       |   |   |   |   |

|  |   |   |   |   |
|--|---|---|---|---|
|  | 3 | 0 | 3 | 0 |
|--|---|---|---|---|

die giraffen sollen raus  
 └─ [REF] [PRO] raus  
 -die giraffen- sollen

2 0 2 0

und die giraffen bekommen angst  
 └─ und die [REF] [PRO] [REF]  
 angst  
 └─ [REF] bekommen  
 giraffen

3 0 3 0

und flitzen ganz schnell weg  
 └─ [PRO] ganz [ATT] [PRO]  
 -flitzen (ganz) schnell-  
 (schnell) weg  
 — und

3 2 0 1

da sind die ganzen pferde  
 └─ da sind die ganzen [REF]  
 pferde

1 0 1 0

die haben ganz viel angst  
 └─ [REF] [PRO] ganz viel [REF]  
 die haben (ganz) angst

2 0 2 0

und da stehen zwei giraffen in dem eck  
 └─ da [PRO]            [REF]            in [REF]  
       (da) stehen -zwei Giraffen-        -dem Eck-  
 └─ und

die haben alle weggelaufen  
 └─ die haben [REF] [PRO]  
                   alle weggelaufen

die sind alle da reingesprungen  
 └─ die sind alle  
 ─ FAILED to trace 'da reingesprungen' (ADD not allowed)

die schwimmen gerade  
└ [REF] [PRO] gerade  
die schwimmen

- und der braucht eine frische windel
- └─ braucht eine [adjm] windel
- ─ FAILED to trace 'frische'
- ─ FAILED to trace 'und der' (ADD not allowed)

4                      1                      2                      1

2                      0                      2                      0

— — — — —

1                      0                      1                      0

— — — — —

der hat die nicht angehabt  
└─ [REF] [PRO] die nicht [PRO]  
der hat (die) angehabt

|   |   |   |   |
|---|---|---|---|
| 2 | 1 | 1 | 0 |
|---|---|---|---|

hier zum gerät  
└─ hier zum [REF]  
Gerät

|   |   |   |   |
|---|---|---|---|
| 1 | 0 | 1 | 0 |
|---|---|---|---|

kaputt ist er  
└─ [ATT] ist er  
kaputt (ist)

|   |   |   |   |
|---|---|---|---|
| 1 | 1 | 0 | 0 |
|---|---|---|---|

die ist noch ganz klein  
└─ [REF] ist noch ganz [ATT]  
die (ganz) klein

|   |   |   |   |
|---|---|---|---|
| 2 | 2 | 0 | 0 |
|---|---|---|---|

klein ist die  
└─ [ATT] ist die  
klein

|   |   |   |   |
|---|---|---|---|
| 1 | 0 | 1 | 0 |
|---|---|---|---|

und dann zieht der meine große windel an  
 └─ und dann [PRO] [REF] [REF] [PRO]  
   └─ zieht der [REF] [PRO]  
 └─ meine [REF] [PRO]  
 └─ [ATT] windel an  
 große

4 0 4 0

da rutscht der takko an die seite  
 └─ da [PRO] [REF] [LOC]  
   rutscht -der takko- -an die seite-

3 0 3 0

wo ist der pulli  
 └─ wo ist der [REF]  
   pulli

1 0 1 0

das ist die hose  
 └─ das ist die [REF]  
   (die) hose

1 1 0 0

bei der blume  
 └─ bei der [REF]  
   (der) blume

1 1 0 0

und da hat mama die aufgezogen  
 └─ und da hat [REF] [REF] [PRO]  
   └─ mama die [PRO]  
 ── FAILED to trace 'aufgezogen'

der teddy kann das anziehen  
 └─ [REF] kann das [PRO]  
   der teddy (das) anziehen

hier ich habe den in der hand  
 └─ ich habe den [LOC]  
       - in der hand-  
 ── hier

hier ist schon eine windel  
 └─ [LOC] ist schon [REF]  
   hier  
   └─ ist schon eine [REF]  
       Windel

aber die windel passt nicht dem teddy  
 └─ [conj REF] passt nicht [REF]  
       -dem teddy-  
   └─ aber die [REF]  
       (die) windel

|   |   |   |   |   |
|---|---|---|---|---|
| - | - | - | - |   |
|   | 2 | 2 | 0 | 0 |
|   | 2 | 0 | 1 | 1 |
|   | 3 | 1 | 2 | 0 |
|   | 3 | 1 | 2 | 0 |

ich habe den gut hingelegt  
 └─ [REF] [PRO] [REF] gut [PRO]  
 -ich habe den- hingelegt

und der teddy drauf  
 └─ der [REF] drauf  
 (und der) Teddy

auf dem treppengeländer  
 └─ auf dem [REF]  
 — FAILED to trace 'treppengeländer'

müssen sich alle abwechseln  
 └─ [PRO] [REF] alle [PRO]  
 -müssen sich- abwechseln

da auf dem karton  
 └─ da auf dem [REF]  
 karton

ich sitze hier  
 └─ ich sitze hier

|   |   |   |   |
|---|---|---|---|
| 2 | 0 | 2 | 0 |
| 1 | 1 | 0 | 0 |
| - | - | - | - |
| 2 | 0 | 2 | 0 |
| 1 | 0 | 1 | 0 |
| 0 | 0 | 0 | 0 |

wir haben gespielt  
└─ wir haben [PRO]  
    gespielt

1                      0                      1                      0

und jetzt spielen wir ohne gerät  
└─ ohne [REF]  
    gerät

— FAILED to trace 'und jetzt spielen wir' (ADD not allowed)

tschüs kleines gerät  
└─ [co] kleines [REF]  
    tschüs      gerät

-                      -                      -                      -

2                      0                      2                      0
