# Supplementary material
Source: publisher site journal article supplement (https://www.degruyterbrill.com/publication/isbn/9783110623857/downloadAsset/9783110623857_Digitaler%20Anhang.zip)
Supplement: Supplementary file 4 [file Fehlertyp_IV.xlsx]

## Sheet: fehlgeschlagene_TB
syntaktisch Fehlgeschlagene Tracebacks:	mögliche Erklärung	Korpusbelege für mögliche Schemata	Korpus Bezugsperson (B) vs. Kind (C)	Notizen/Gedanken	Fehlertypen:	Kind
du bist noch gerade bei der Eisenbahn bei der [REF] (der) Eisenbahn failed: du bist noch gerade (add not allowed)	d)	*CHI: Katze ist auf (de)m Wasserhahn . [+ diary] %mor: n|Katze&f&sg cop|sein&PRES&3s prep|auf det|dem&m&sg&dat n|Wasserhahn&m&sg&dat . *MUT: ja , (e)s is(t) auf (de)m Skateboard , genau . %mor: co|ja cm|cm pro:per|es cop|sein&PRES&3s prep|auf det|dem&n&sg&dat n|Skateboard&n&sg&dat cm|cm co|genau .	B, C	es findet sich: [REF][PRO] [LOC] Struktur der LOC-Slot ist dabei noch einmal als teilspezifisches Schema bei der [REF] hinterlegt die Adverbien "noch" und "gerade" lassen sich nicht integrieren anhand der Korpusdaten	d) Fehlen einer Konstituente in der Zieläußerung, die im Schema enthalten ist oder umgekehrt - aber die Konstruktionen ähneln sich stark	Leo
müssen die Leute doch gar nicht da aussteigen müssen die [REF] [LOC] [PRO] (die) Leute da aussteigen failed: doch gar nich(t) (add not allowed) "doch gar nicht" wird häufig als Chunk verwendet	d)	*MUT: was müssen die Passagiere <im Haupt(bahnhof)> [//] am Hauptbahnhof tun ? %mor: pro|was mod|müssen-PRES&13p det|die&pl&nom&acc n|Passagier&m&nom&acc-pl prep|an~det|dem n|Hauptbahnhof&m&sg vinf|tun-INF ? *MUT: da müssen die Leute doch gar nich(t) drin schlafen , Leo . %mor: adv:loc|da mod|müssen-PRES&13p det|die n|Leute&f&pl adv|doch adv|gar adv|nicht adv:loc|drin vinf|schlafen-INF cm|cm n:pr…	B	das Problem ist "doch gar nicht", da so nicht auf der Grundlage der Daten und den Kriterien der Methode integriert werden darf Belege für Chunk "doch gar nicht": *VAT: aber es ist doch gar nicht dunkel . %mor: conj|aber pro:per|es cop|sein&PRES&3s adv|doch adv|gar adv|nicht adj|dunkel . *MEC: (ei)n anderes haben wir doch gar nich(t) . %mor: adjm|ein&det adjm|ander&det-es v|haben-PRES&13p pro:per|…		Leo
weil du gerade damit selber spielst [conj] du gerade [PRO] weil (du) spielst failed: damit selber (add not allowed)	d)	*MUT: dafür , dass du g(e)rade gekleckert hat bist du ganz schön unverschämt . %mor: adv|dafür cm|cm conj|dass pro:per|du adv|gerade ge#part|kleckern-PASTP2 aux|haben-PRES&3s cop|sein&PRES&2s pro:per|du adv|ganz adj|schön un#ver#part|schämen-PASTP2 . *MUT: hm hm , das tu(e) ich nur , wenn du dir aus Versehen wehgetan hast , aber das was du g(e)rade treibst . %mor: co|hm co|hm cm|cm pro|das v|tun-…	B			Leo
die Wolken ganz blau ganz blau failed: die Wolken (add not allowed)	d)	*MUT: guck mal , der is(t) ganz blau . %mor: vimp|gucken&IMP&2s adv|mal cm|cm pro|der cop|sein&PRES&3s adv|ganz adj|blau . *MUT: Leo , dein Arm is(t) ja ganz blau ! %mor: n:prop|Leo cm|cm adjm|dein&det&m&sg&nom n|Arm&m&sg&nom cop|sein&PRES&3s co|ja adv|ganz adj|blau !	B	Schema kann abgeleitet werden: [REF]ist ganz blau		Leo
die kommt gerade da an [REF] kommt [PRO] -die (kommt)- an failed: gerade da (add not allowed)	d)	*CHI: das ein Feuer kommt raus . %mor: pro|das adjm|ein&det&n&sg&nom n|Feuer&n&sg&nom&acc v|kommen-PRES&3s vpfx|raus . *MEC: die Stewardess kommt herbei . %mor: det|die&f&sg&nom&acc n|Stewardess&f&sg&nom&acc v|kommen-PRES&3s vpfx|herbei	B, C	[PRO]-Slot ist hier immer auf vpfx restringiert erneut die die Frage, wie Kinder solche Schemata erweitern, um neue Konstituten zu integrieren - evtl. durch Analogiebildung! Hier Beispiele aus dem Korpus, die dazu dienen könnten: *MUT: hm , der Bus fährt gleich weiter , genau . %mor: co|hm cm|cm det|der n|Bus&m v|fahren-PRES&23s adv|gleich vpfx|weiter cm|cm co|genau . *CHI: der Zug [% MA] fährt g…		Leo
ich möchte mit das spielen ich möchte [PRO] spielen failed: mit das (add not allowed)	d)	*CHI: ich möt [: möchte] spielen . %mor: pro:per|ich mod|mögen-KONJ&13s vinf|spielen-INF . *CHI: i(ch) mö(ch)t(e) das fangen . %mor: pro:per|ich mod|mögen-KONJ&13s pro|das vinf|fangen-INF . *CHI: i(ch) mö(ch)t(e) (.) anspitzen . %mor: pro:per|ich mod|mögen-KONJ&13s an#vinf|spitzen-INF .	C			Marieke
ist das sogar das ein Deckel das ein [REF] Deckel failed: ist das sogar (add not allowed)	d)	*CHI: ist das ein Haus ? %mor: cop|sein&PRES&3s pro|das adjm|ein&det&n&sg&nom&acc n|Haus&n&sg&nom&acc ? *MOT: is(t) das ein Bandit ? %mor: cop|sein&PRES&3s pro|das adjm|ein&det&m&sg&nom n|Bandit&m&sg&nom ?	C, B			Marieke
weil da die Decke da immer drauf [conj] da die failed: Decke da immer drauf (add not allowed)	d)	*CHI: un(d) da die Möse [: Mäuse] auk [: auch] . %mor: conj|und adv:loc|da det|die&pl&nom&acc n|Maus&f&nom&acc-pl adv|auch *MOT: und da die Zahlen , die da laufen , die zeigen die Sekunden an . %mor: conj|und adv:loc|da det|die&pl&nom&acc n|Zahl&f&nom&acc-pl cm|cm pro|die adv:loc|da vinf|laufen-INF cm|cm pro|die v|zeigen-PRES&13p det|die&pl&nom&acc n|Sekunde&f&nom&acc-pl vpfx|an . *CHI: der Hund …	C, B	findet sogar nicht das Schema: [conj] da die [REF] weil keine Type-Variation vorliegt. Immer nur "und da die X"		Marieke
du bist wieder dran [REF] wieder dran du failed: bist (add not allowed)	d)	*CHI: ich bin wieder dran mit Puzzeln . %mor: pro:per|ich cop|sein&PRES&1s adv|wieder vpfx|dran prep:nloc|mit n|Puzzeln&n&sg . *CHI: +< ich wieder dran . %mor: pro:per|ich adv|wieder vpfx|dran . *CHI: Mama wieder dran . %mor: n|Mama&f&sg adv|wieder vpfx|dran .	C	Konstiuente, also in dem Fall das Verb "sein", beherrscht sie		Marieke
nein die müssen da bei uns jetzt stehen bleiben nein die müssen [PRO] stehen bleiben failed: da bei uns jetzt (add not allowed)	d)	*MOT: und die müssen <aufgeräumt werden> [?] . %mor: conj|und pro|die mod|müssen-PRES&13p auf#ge#part|räumen-PASTP2 vinf|werden-INF . *CHI: un(d) die mussen [: müssen] schlafen ers(t) . %mor: conj|und pro|die mod|müssen-PRES&13p vinf|schlafen-INF adv|erst . *CHI: die mussen [: müssen] ers(t) da schlafen . %mor: pro|die mod|müssen-PRES&13p adv|erst adv:loc|da vinf|schlafen-INF . *MOT: doch , die m…	B, C			Marieke
und die Würfel müssen bei mir in der Hand und die [REF] müssen (die) Würfel failed: bei mir in der Hand (add not allowed)	d)	*CHI: abgeholt und die Pferde müssen auch abgeholt . %mor: ab#ge#part|holen-PASTP2 conj|und det|die&pl&nom&acc n|Pferd&n&nom&acc-pl mod|müssen-PRES&13p adv|auch ab#ge#part|holen-PASTP2 . *CHI: hm@o da müssen die Ferkel und die Mama müssen da rein parken und die Mama kommt dahin . %mor: on|hm adv:loc|da mod|müssen-PRES&13p det|die&n&pl&nom&acc n|Ferkel&n&pl&nom&acc conj|und det|die&f&sg&nom&acc n|…	C			Marieke
der soll jetzt mit mir die Puppe anschauen [REF] soll [PRO] der anschauen failed: jetzt mit mir die Puppe (add not allowed)	d)	*MOT: ich soll Paula malen ? %mor: pro:per|ich mod|sollen-PRES&13s n:prop|Paula vinf|malen-INF ? *CHI: ich soll da mal in deiner Ma(m)a hängen . %mor: pro:per|ich mod|sollen-PRES&13s adv:loc|da adv|mal prep|in adjm|dein&det&f&sg&gen&dat-er n|Mama&f&sg&gen&dat vinf|hängen-INF .	B, C	die Äußerung ist äußerst komplex und enthält mehrere Konstituenten, die sich in der Kombination im Korpus nicht finden lassen Merit erweitert die Konstruktion [REF] soll [PRO] zwar schon selbst, aber nicht so komplex wie in der Zieläußerung		Merit
der hat in die Windel A_a gemacht der hat A_a gemacht failed: in die Windel (add not allowed)	d)	*CHI: der hat A_a gemacht der Hund . %mor: pro|der aux|haben-PRES&3s n|A_a&n&sg ge#part|machen-PASTP2 det|der&m&sg&nom n|Hund&m&sg&nom . *CHI: der hat a_A gemacht . %mor: pro|der aux|haben-PRES&3s n|A_a&n&sg ge#part|machen-PASTP2 .	C	es finden sich keine Äußerungen, in denen die CP mit einer lokativen Angabe erweitert wurde		Merit
und dann male ich hier neben Dominik hin dann male ich hier [REF] hin +und (add) Dominik failed: neben (add not allowed)	d)	*MOT: dann mal(e) ich hier jetzt einen Hals . %mor: adv|dann v|malen-PRES&1s pro:per|ich adv:loc|hier adv|jetzt adjm|ein&det&m&sg&acc-en n|Hals&m&sg&acc . *MOT: oh@o , dann mal(e) ich hier noch eins hin . %mor: on|oh cm|cm adv|dann v|malen-PRES&1s pro:per|ich adv:loc|hier adv|noch pro|eins vpfx|hin .	B			Merit
da sind sie alle runtergefallen da [PRO] sie [PRO] sind runtergefallen failed: alle (add not allowed)	d)	*MOT: +" da sind sie rausgestiegen . %mor: adv:loc|da aux|sein&PRES&13p pro:per|sie raus#ge#part|steigen-PASTP1 . *MOT: ah@o , gestern lag die unter dem [//] unter (de)m Sofa noch , ne@o , da ist sie runtergerutscht . %mor: on|ah cm|cm adv|gestern v|liegen&PAST&13s pro|die prep|unter prep|unter det|dem&n&sg&dat n|Sofa&n&sg&dat adv|noch cm|cm on|ne cm|cm adv:loc|da aux|sein&PRES&3s pro:per|sie run…	B	[PRO]-Slots auf die Kopula sowie das Partizip restringiert		Merit
da musst du dich mal hier unten hinlegen [PRO] du [REF] mal [PRO] musst dich hinlegen +da (add) failed: hier unten (add not allowed)	d)	*MOT: dann kannst du (e)s mal werfen , ne@o ? %mor: adv|dann mod|können-PRES&2s pro:per|du pro:per|es adv|mal vinf|werfen-INF cm|cm on|ne ? *MOT: möchtest du sie mal streicheln ? %mor: mod|mögen-KONJ&2s pro:per|du pro:per|sie adv|mal vinf|streicheln-INF ?	B	folgendes Schema findet sich in den Daten: mal hier [LOC] [PRO] unten [PRO] hinlegen		Merit
da war er schon bei den Schweinen da [PRO] [REF] [LOC] war er bei den [REF] (den) Schweinen failed: schon (add not allowed)	d)	*CHI: da war ich auf der Ruts(ch)e . %mor: adv:loc|da cop|sein&PAST&13s pro:per|ich prep|auf det|der&pl&gen n|Rutsch&m&gen-pl . *CHI: da is(t) es in me(inem) Mund . %mor: adv:loc|da cop|sein&PRES&3s pro:per|es prep|in adjm|mein&det&m&sg&dat-em n|Mund&m&sg&dat .	C			Merit
ich habe das Pferd wieder umgezogen ich habe [REF] [PRO] das Pferd umgezogen failed: wieder (add not allowed)	d)	*CHI: ich hab(e) den Stift gemalt . %mor: pro:per|ich aux|haben-PRES&1s det|den&m&sg&acc n|Stift&m&sg&acc ge#part|malen-PASTP2 . *CHI: ich hab(e) den Fuchs angeknabbert . %mor: pro:per|ich aux|haben-PRES&1s det|den&m&sg&acc n|Fuchs&m&sg&acc an#ge#part|knabbern-PASTP2 .	C	[PRO]-Slot auf Partizip restringiert		Merit
da legt es sich oben hin da [PRO] [REF] [REF] [PRO] failed: oben (add not allowed)	d)	*MOT: ach@o da steckst du die Schneebälle rein ? %mor: on|ach adv:loc|da v|stecken-PRES&2s pro:per|du det|die&pl&nom&acc n|Schneeball&m&nom&acc-pl vpfx|rein ? *CHI: da mach(e) ich den Koten [: Knoten] raus . %mor: adv:loc|da v|machen-PRES&1s pro:per|ich det|den&m&sg&acc n|Knoten&m&sg&acc vpfx|raus .	B, C			Merit
das da gerade ist der Haken das da ist [REF] der Haken failed: gerade	d)	*CHI: das da ist ein Pferd . %mor: pro|das adv:loc|da cop|sein&PRES&3s adjm|ein&det&n&sg&nom&acc n|Pferd&n&sg&nom&acc . *CHI: aber das da ist der Kuhs(t)all . %mor: conj|aber pro|das adv:loc|da cop|sein&PRES&3s det|der&m&sg&nom n|Kuhstall&m&sg&nom .	C			Merit
und ich hänge hier gut die Sachen hin ich [PRO] [LOC] [REF] [PRO] hänge hier die Sachen hin +und (add) failed: gut (add not allowed)	d)	*FAT: ich hol(e) hier die Tonne ab düdüdüdü@o . %mor: pro:per|ich v|holen-PRES&1s adv:loc|hier det|die&f&sg&nom&acc n|Tonne&f&sg&nom&acc vpfx|ab on|düdüdüdü . *CHI: ich mach(e) da die Fieße [: Füße] drauf . %mor: pro:per|ich v|machen-PRES&1s adv:loc|da det|die&pl&nom&acc n|Fuß&m&nom&acc-pl vpfx|drauf .	B, C	der [PRO]-Slot am Ende ist auf Verbpartikel restringiert		Merit
und da ist hier die Kuh drin da ist [REF] drin die Kuh und (add) failed: hier (add not allowed)	d)	*CHI: da ist ein S(t)ift drin , oben . %mor: adv:loc|da cop|sein&PRES&3s adjm|ein&det&m&sg&nom n|Stift&m&sg&nom adv:loc|drin cm|cm adv:loc|oben . *CHI: da ist das Fieberthermometer drin . %mor: adv:loc|da cop|sein&PRES&3s det|das&n&sg&nom&acc n|Fieberthermometer&n&sg&nom&acc adv:loc|drin .	C			Merit
die kommen jetzt gleich wieder da rein die [PRO] [adv] [adv] [adv] [LOC] [PRO] (die) kommen -jetzt gleich (wieder)- wieder da [PRO] rein failed: die Slots [adv] [adv] innerhalb des Schemas lassen sich nicht generalisieren (add not allowed)	d)	*MOT: guck mal , die gehören doch hier rein . %mor: vimp|gucken&IMP&2s adv|mal cm|cm pro|die v|gehören-PRES&13p adv|doch adv:loc|hier vpfx|rein . *MOT: die ist nicht abgebrochen oder meinst du die brechen manchmal im Anspitzer ab? %mor: pro|die cop|sein&PRES&3s adv|nicht ab#ge#part|brechen-PASTP1 conj|oder v|meinen-PRES&2s pro:per|du pro|die v|brechen-PRES&13p adv|manchmal prep|in~det|dem n|Anspi…	B	es stellt sich die Frage, ob es sich um einen Adverb-Slot handelt oder um meherere Slots. Wenn es nur ein Slot wäre, ließe sich die Äußerung ableiten		Merit
da kann es gleich sich drauflegen da kann es sich [PRO] drauflegen failed: gleich (add not allowed)	d)	*MOT: da kann es sich draufsetzen , ne@o , das sieht bequem aus . %mor: adv:loc|da mod|können-PRES&13s pro:per|es pro:refl|sich drauf#vinf|setzen-INF cm|cm on|ne cm|cm pro|das v|sehen-PRES&3s adj|bequem vpfx|aus . *MOT: genau , da kann es sich mit dem Kopf hinlegen , damit es gut stillhalten kann . %mor: co|genau cm|cm adv:loc|da mod|können-PRES&13s pro:per|es pro:refl|sich prep:nloc|mit det|dem&…	B			Merit
der auch oben parken der auch [PRO] parken failed: oben (add not allowed)	d)	*CHI: der auch fah(r)en . %mor: pro|der adv|auch vinf|fahren-INF . *MOT: da ist der auch rausgekommen . %mor: adv:loc|da aux|sein&PRES&3s pro|der adv|auch raus#ge#part|kommen-PASTP1 .	B, C			Simon
