# Supplementary material
Source: publisher site journal article supplement (https://www.degruyterbrill.com/publication/isbn/9783110623857/downloadAsset/9783110623857_Digitaler%20Anhang.zip)
Supplement: Supplementary file 4 [file Simon.pdf › Ableitungen_Zieläußerungen/Simon.pdf]

Simon

(min. Cp: 2; min. Scheme: 2)

Result

da ist grün

└─ da ist [ATT]  
    (ist) grün

Operations

Superimpositions

Substitutes

Additions

1

1

0

0

da ist rot

└─ da ist [ATT]  
    (ist) rot

1

1

0

0

nein jetzt ein grüner

└─ jetzt ein [REF]  
    (ein) grüner  
└─ nein

2

1

0

1

wo kommt der hin

└─ [REF] [PRO] der hin  
    wo kommt (der)

1

1

0

0

was denn der

└─ was denn [REF]  
    (denn) der

1

1

0

0

was ist da

└─ was ist da

0

0

0

0

nein glaube nicht  
└─ nein [PRO adv]  
glaube nicht

1 0 1 0

da kommt der postbote  
└─ da kommt der [REF]  
(der) postbote

1 1 0 0

ich laufe vor  
└─ ich [PRO] [PRO]  
└─ [PRO] vor  
laufe

2 0 2 0

das sind anhängen ja  
└─ [REF] [PRO] [REF] ja  
-das sind anhängen-

1 0 1 0

ich nicht schwimmen  
└─ ich nicht [PRO]  
schwimmen

1 0 1 0

gehört dem da  
└─ [PRO] [REF] da  
└─ gehört [REF]  
dem

2 0 2 0

und das simon  
 └─ und das [REF]  
     (das) simon

1 1 0 0

ich hole das  
 └─ ich hole das

0 0 0 0

papa aufräumen die bücher  
 └─ papa [PRO] die  
     aufräumen  
 ── FAILED to trace 'bücher' (ADD not allowed)

- - - -

nein aufräumen das  
 └─ nein [PRO] das  
     aufräumen

1 0 1 0

nein da gehört er hin  
 └─ nein da [PRO] [REF] [PRO]  
     └─ [PRO] er hin  
        gehört

2 0 2 0

das auch rot  
└─ das auch [adv]  
    (auch) rot

|   |   |   |   |
|---|---|---|---|
| 1 | 1 | 0 | 0 |
|---|---|---|---|

das auch leuchtet  
└─ das auch [PRO]  
    leuchtet

|   |   |   |   |
|---|---|---|---|
| 1 | 0 | 1 | 0 |
|---|---|---|---|

geht das auf  
└─ [PRO] das auf  
    geht (das)

|   |   |   |   |
|---|---|---|---|
| 1 | 1 | 0 | 0 |
|---|---|---|---|

pack ich das aus  
└─ [PRO] ich das [PRO]  
    pack  
        (das) aus

|   |   |   |   |
|---|---|---|---|
| 2 | 0 | 2 | 0 |
|---|---|---|---|

kerstin auch delfin  
└─ kerstin auch [REF]  
    delfin

|   |   |   |   |
|---|---|---|---|
| 1 | 0 | 1 | 0 |
|---|---|---|---|

bring mal die fische und die angel  
 └─ [PRO] [REF] und die [REF]  
     (die) angel  
     └─ [PRO] mal die [REF]  
        (die) fische  
        bring (mal)

|   |   |   |   |
|---|---|---|---|
| 4 | 4 | 0 | 0 |
|---|---|---|---|

wer ist das  
 └─ wer ist das

|   |   |   |   |
|---|---|---|---|
| 0 | 0 | 0 | 0 |
|---|---|---|---|

essen die banane  
 └─ essen die [REF]  
     (die) banane

|   |   |   |   |
|---|---|---|---|
| 1 | 1 | 0 | 0 |
|---|---|---|---|

soll noch nicht  
 └─ [PRO] noch nicht  
     soll

|   |   |   |   |
|---|---|---|---|
| 1 | 0 | 1 | 0 |
|---|---|---|---|

ja ich mache  
 └─ ja ich mache

|   |   |   |   |
|---|---|---|---|
| 0 | 0 | 0 | 0 |
|---|---|---|---|

mama aufmachen riechen  
 └─ mama [PRO] [PRO]  
   └─ aufmachen [PRO]  
     riechen

2                    0                    2                    0

bitte eincremt die creme  
 └─ [co PRO] die [REF]  
                   creme  
   └─ bitte [PRO]  
     eincremt

3                    0                    3                    0

creme gar nicht da  
 └─ [REF] gar nicht da  
     creme

1                    0                    1                    0

so bleibt es  
 └─ so [PRO] es  
     bleibt

1                    0                    1                    0

ich crocs ziehe aus  
 └─ ich [REF] [PRO] [PRO]  
   └─ [REF] [PRO] aus  
     └─ crocs [PRO]  
       ziehe

3                    0                    3                    0

fina geht da  
└─ [REF] geht da  
fina

1 0 1 0

fina ist da  
└─ [REF] ist da  
fina

1 0 1 0

elefant meine tasche  
└─ [REF] meine tasche  
elefant

1 0 1 0

elefant kommt wieder  
└─ [REF] kommt wieder  
elefant

1 0 1 0

da ist mama  
└─ da ist [REF]  
(ist) mama

1 1 0 0

da ist papa oma  
└─ da ist [REF] [REF]  
└─ papa [REF]  
oma

2 0 2 0

ach@o oma opa  
 └─ oma [REF]  
     opa  
 ─ ach@o

2                      0                      1                      1

da auch heißluftballon  
 └─ da auch [REF]  
     heißluftballon

1                      0                      1                      0

draußen auch heißluftballons  
 └─ [LOC] auch [REF]  
     draußen      heißluftballons

2                      0                      2                      0

ich auch hoch  
 └─ ich auch [ATT]  
     (auch) hoch

1                      1                      0                      0

will mal haben fuchs  
 └─ [PRO] mal [PRO] [REF]  
     will  
     └─ haben [REF]  
         fuchs

3                      0                      3                      0

ich nehme mal fina  
 └─ ich nehme mal  
 ── fina

1 0 0 1

die da ausmachen  
 └─ die da [PRO]  
 ausmachen

1 0 1 0

kinder müssen in das bett  
 └─ [REF] müssen [LOC]  
 kinder -in das bett-

2 0 2 0

ich wieder holen  
 └─ [REF] wieder holen  
 ich (wieder)

1 1 0 0

ich versuche mal  
 └─ [REF] versuche mal  
 ich

1 0 1 0

nein große löffel  
 └─ nein [REF]  
 └─ große [REF]  
 löffel

2 0 2 0

geh weg mama  
└─ geh weg mama

0 0 0 0

das kommt weg  
└─ [REF] [PRO] weg  
-das kommt-

1 0 1 0

nein nicht abmachen  
└─ nein nicht [PRO]  
abmachen

1 0 1 0

ja eier kommt weg  
└─ ja [REF] kommt  
eier  
— weg

2 0 1 1

ich auch machen  
└─ ich auch [PRO]  
(auch) machen

1 1 0 0

mama ein stern  
└─ mama ein [REF]  
stern

1 0 1 0

auto fährt denn das  
 └─ [REF] [PRO] denn das  
 -auto fährt-

1 0 1 0

und das komisch  
 └─ und das [ATT]  
 komisch

1 0 1 0

ein komisch da  
 └─ ein [ATT] da  
 komisch

1 0 1 0

die eier nehme ich  
 └─ die eier  
 — FAILED to trace 'nehme ich' (ADD not allowed)

- - - -

noch ein ei  
 └─ noch ein [REF]  
 (ein) ei

1 1 0 0

da auch die drauf  
 └─ da auch [REF] [PRO]  
 -die drauf-

1 0 1 0

da liegt das  
 └─ da liegt [REF]  
     (liegt) das

1                      1                      0                      0

und dach kaputt  
 └─ und [REF] [ATT]  
     -dach kaputt-

1                      0                      1                      0

oh\_nein@o dach kaputt  
 └─ dach kaputt  
 ─ oh\_nein@o

1                      0                      0                      1

und guck mal  
 └─ und guck mal

0                      0                      0                      0

ja guck mal  
 └─ ja guck mal

0                      0                      0                      0

hat rosa gummistiefel an  
 └─ [PRO] [ATT] gummistiefel an  
     └─ hat [ATT]  
       rosa

2                      0                      2                      0

und das auch  
 └─ und das  
 ── auch

1                      0                      0                      1

und die da  
 └─ und die [LOC]  
     (die) da

1                      1                      0                      0

wo ist die katze  
 └─ wo ist die [REF]  
     (die) katze

1                      1                      0                      0

und die mama die papa oma  
 └─ und die Mama  
 ── die Papa  
 ── oma

2                      0                      0                      2

malen und schreiben  
 └─ [PRO] und [PRO]  
     malen      schreiben

2                      0                      2                      0

möchte da schreiben  
 └─ möchte da [PRO]  
     schreiben

1                      0                      1                      0

ja einen stift holen ich  
 └─ holen [REF]  
     ich  
 — FAILED to trace 'ja einen stift' (ADD not allowed)

in müll schmeißen das  
 └─ in [REF] [PRO] das  
     -müll schmeißen-

|                                                      |   |   |   |   |
|------------------------------------------------------|---|---|---|---|
|                                                      | - | - | - | - |
|                                                      |   |   |   |   |
|                                                      | 1 | 0 | 1 | 0 |
| der malt gar nicht<br>└─ der [PRO] gar nicht<br>malt |   |   |   |   |

|                                                  |   |   |   |   |
|--------------------------------------------------|---|---|---|---|
|                                                  | 1 | 0 | 1 | 0 |
| ich auch gesicht<br>└─ ich auch [REF]<br>gesicht |   |   |   |   |

|                                                |   |   |   |   |
|------------------------------------------------|---|---|---|---|
|                                                | 1 | 0 | 1 | 0 |
| da ist ein herz<br>└─ da ist ein [REF]<br>herz |   |   |   |   |

|                                                                             |   |   |   |   |
|-----------------------------------------------------------------------------|---|---|---|---|
|                                                                             | 1 | 0 | 1 | 0 |
| ja ich komme mal runter<br>└─ ja ich [PRO adv PRO]<br>komme<br>-mal runter- |   |   |   |   |

|  |   |   |   |   |
|--|---|---|---|---|
|  | 2 | 0 | 2 | 0 |
|--|---|---|---|---|

der ist oben  
└─ der ist [LOC]  
    (ist) oben

|   |   |   |   |
|---|---|---|---|
| 1 | 1 | 0 | 0 |
|---|---|---|---|

und der blinkt  
└─ und der [PRO]  
    blinkt

|   |   |   |   |
|---|---|---|---|
| 1 | 0 | 1 | 0 |
|---|---|---|---|

ich baue das  
└─ [REF] [PRO] das  
    -ich baue-

|   |   |   |   |
|---|---|---|---|
| 1 | 0 | 1 | 0 |
|---|---|---|---|

der auch fährt rückwärts  
└─ [REF adv] fährt [PRO]  
    der auch  
            rückwärts

|   |   |   |   |
|---|---|---|---|
| 2 | 0 | 2 | 0 |
|---|---|---|---|

nein der nicht  
└─ nein der nicht

|   |   |   |   |
|---|---|---|---|
| 0 | 0 | 0 | 0 |
|---|---|---|---|

und der muss  
└─ und der muss

|   |   |   |   |
|---|---|---|---|
| 0 | 0 | 0 | 0 |
|---|---|---|---|

der auch oben parken  
 └─ der auch  
 — FAILED to trace 'oben parken' (ADD not allowed)

- - - -

und der diese  
 └─ und der [REF]  
 diese

1 0 1 0

mit in den urlaub fahren  
 └─ mit in den [REF] [PRO]  
 -urlaub fahren-

1 0 1 0

draußen bin ich  
 └─ [LOC] bin ich  
 draußen

1 0 1 0

ich auch giraffe  
 └─ ich auch [REF]  
 giraffe

1 0 1 0

im bett giraffe  
 └─ im bett  
 — FAILED to trace 'giraffe' (ADD not allowed)

- - - -

mama spielplatz gehen  
 └─ mama [REF] [PRO]  
   └─ [REF] gehen  
     spielplatz

2 0 2 0

draußen auch hubschrauber  
 └─ [LOC] auch [REF]  
   draußen hubschrauber

ein trecker kommt da angefahren  
 └─ [REF] kommt da [PRO]  
   -ein trecker- angefahren

2 0 2 0

und da der trecker hochfahren  
 └─ der trecker [PRO]  
           hochfahren  
 — und da

2 0 2 0

nein nicht dach  
 └─ nein nicht [REF]  
       dach

2 0 1 1

1 0 1 0

und es gibt das  
 └─ [conj] [REF] [PRO] das  
 -und es gibt-

1                      0                      1                      0

das gibt es  
 └─ [REF] gibt es  
 das

1                      0                      1                      0

und drin schlafen  
 └─ und [LOC] [PRO]  
 └─ drin [PRO]  
 schlafen

2                      0                      2                      0

guck mal eisenbahn  
 └─ guck mal [REF]  
 eisenbahn

1                      0                      1                      0
