# Supplementary material
Source: publisher site journal article supplement (https://www.degruyterbrill.com/publication/isbn/9783110623857/downloadAsset/9783110623857_Digitaler%20Anhang.zip)
Supplement: Supplementary file 5 [file Fehlertyp_V.xlsx]

## Sheet: fehlgeschlagene_TB
syntaktisch Fehlgeschlagene Tracebacks:	mögliche Erklärung	Korpusbelege für mögliche Schemata	Korpus Bezugsperson (B) vs. Kind (C)	Notizen/Gedanken	Fehlertypen:	Kind
und die andere Kläppchen machen wir nicht auf [REF] [PRO] [REF] [PRO] die anderen Kläppchen machen wir nicht [PRO] auf +und (add) failed: kein teilspezifisches Schema	e)	*MOT: die Mama holt die ab ? %mor: det|die&f&sg&nom&acc n|Mama&f&sg&nom&acc v|holen-PRES&3s pro|die vpfx|ab ? *MOT: die Vogelmama brütet das aus . %mor: det|die&f&sg&nom&acc n|Vogelmama&f&sg&nom&acc v|brüten-PRES&3s2p pro|das vpfx|aus	B		e) es wird nur ein vollständig abstraktes Schema gefunden, ohne lexikalische Bausteine	Merit
jetzt kommt das hier hin [adv] [PRO] [REF] [LOC] [PRO] -jetzt kommt das- -hier hin- failed: kein teilspezifisches Schema	e)	*MOT: vielleicht passt das hier dran . %mor: adv|vielleicht v|passen-PRES&23s2p pro|das adv:loc|hier vpfx|dran . *CHI: und dann geht der oben rein in das Ges(ch)äft . %mor: conj|und adv|dann v|gehen-PRES&3s pro|der adv:loc|oben vpfx|rein prep|in det|das&n&sg&nom&acc n|Geschäft&n&sg&nom&acc .	B, C			Merit
jetzt kommt es hier hin [adv] [PRO] [REF] [LOC] [PRO] -jetzt kommt es- -hier hin- failed: kein teilspezifisches Schema	e)	*MOT: vielleicht passt das hier dran . %mor: adv|vielleicht v|passen-PRES&23s2p pro|das adv:loc|hier vpfx|dran . *CHI: und dann geht der oben rein in das Ges(ch)äft . %mor: conj|und adv|dann v|gehen-PRES&3s pro|der adv:loc|oben vpfx|rein prep|in det|das&n&sg&nom&acc n|Geschäft&n&sg&nom&acc .	B, C			Merit
jetzt will die Kuh wieder raus [adv] [PRO] [REF] [adv] [DIR] jetzt will -die Kuh- wieder raus failed: kein teilspezifisches Schema	e)	*CHI: so musst du mal runter machen , weil Paula runtermalt . %mor: adv|so mod|müssen-PRES&2s pro:per|du adv|mal adv:dir|runter vinf|machen-INF cm|cm conj|weil n:prop|Paula runter#v|malen-PRES&3s *MOT: +" oh@o , dann möcht(e) ich auch mit . %mor: on|oh cm|cm adv|dann mod|mögen-KONJ&13s pro:per|ich adv|auch vpfx|mit . *CHI: aber so kann das Kind nich(t) rein . %mor: conj|aber adv|so mod|können-PRE…	B, C	3 Beispiele um vorhandene Typ-Variation zu zeigen		Merit
und dann habe ich es da draufgelegt [adv] [PRO] [REF] [REF] [LOC] [PRO| dann habe ich es da [PRO] draufgelegt failed: kein teilspezifisches Schema	e)	*MOT: dafür hab(e) ich (e)s ja da hingestellt , ne@o . %mor: adv|dafür aux|haben-PRES&1s pro:per|ich pro:per|es co|ja adv:loc|da hin#ge#part|stellen-PASTP2 cm|cm on|ne . *FAT: ohje@o [x 3] , jetzt hast du dich hier drübergelehnt . %mor: on|ohje cm|cm adv|jetzt aux|haben-PRES&2s pro:per|du pro:per|dich adv:loc|hier ge#part|drüberlehnen-PASTP2 .	B			Merit
die hat im Büro gehangen [REF] [PRO] [LOC] [PRO] -die hat- -im Büro- gehangen failed: kein teilspezifisches Schema	e)	*CHI: ich hab(e) hier angemalt , was ist das ? %mor: pro:per|ich aux|haben-PRES&1s adv:loc|hier an#ge#part|malen-PASTP2 cm|cm pro:int|was cop|sein&PRES&3s pro|das ? *CHI: Just hat da gestanden ? %mor: n:prop|Just aux|haben-PRES&3s adv:loc|da ge#part|stehen-PASTP1 ?	C	die [PRO]-Slots sind auf Auxiliar und Partizip restringiert		Merit
die Eier nehme ich [REF] [PRO] [REF] -die Eier- nehme ich failed: kein teilspezifisches Schema	e)	*MOT: die Ampel suchst du ? %mor: det|die&f&sg&nom&acc n|Ampel&f&sg&nom&acc v|suchen-PRES&2s pro:per|du ? *MOT: das Windrad gehört uns all(e)n . %mor: det|das&n&sg&nom&acc n|Windrad&n&sg&nom&acc v|gehören-PRES&3s pro:per|uns adjm|all&det-en .	B			Simon
