# Supplementary material
Source: publisher site journal article supplement (https://www.degruyterbrill.com/publication/isbn/9783110623857/downloadAsset/9783110623857_Digitaler%20Anhang.zip)
Supplement: Supplementary file 5 [file Transkriptionsmanual.pdf › Transkriptionsmanual.pdf]

# Symbolverzeichnis CHAT-Format

Nikolas Koch  
Wissenschaftlicher Mitarbeiter  
Lehrstuhl Prof. Dr. Claudia Maria Riehl  
Germanistische Linguistik mit Schwerpunkt DaF  
Ludwig-Maximilians-Universität München  
Institut für Deutsch als Fremdsprache

| Symbol                                                                                   | Erklärung                                                                                                                                                                                                                                                                                                                                                                                                                                                                                                                                                                                                                                                                                                                                                                                                                                                                                                                                                                                                                                                                                                                                                                                                                                           |
|------------------------------------------------------------------------------------------|-----------------------------------------------------------------------------------------------------------------------------------------------------------------------------------------------------------------------------------------------------------------------------------------------------------------------------------------------------------------------------------------------------------------------------------------------------------------------------------------------------------------------------------------------------------------------------------------------------------------------------------------------------------------------------------------------------------------------------------------------------------------------------------------------------------------------------------------------------------------------------------------------------------------------------------------------------------------------------------------------------------------------------------------------------------------------------------------------------------------------------------------------------------------------------------------------------------------------------------------------------|
| <p><b>Beginn der Transkription</b></p> <p>@Header haben nie ein Satzzeichen am Ende!</p> | <p>@Loc: Germanic / German / Name Kind / Dateiname (z.B. le020012.cha)</p> <p>@Begin</p> <p>@Languages: deu</p> <p>@Participants: CHI Name Target_Child, MOT Name Mother</p> <p>@ID: Spezifikation der Gesprächsteilnehmer (s. @ID unten)</p> <p>deu   CHI   1;09.13   female   Target_Child    </p> <p>@ID: language, code, age, sex, ses (low, middle, high), role, education</p> <p>deu   MOT   26   female   middle   mother   university    </p> <p>@Date: 13-Dez-2013</p> <p>@Transcriber:</p> <p>@Activities:</p> <p>@Situation:</p> <p>@Comment:</p> <p>@Location: Lippstadt, NRW, Deutschland (z. B. Bosten, MA, USA)</p> <p>@New Episode</p> <p>@Media: 0570, audio, missing (erste Zahl ist Dateikürzel des Audiofiles, dann Art und missing heißt, dass es nicht verknüpft ist)</p> <p>@End</p>                                                                                                                                                                                                                                                                                                                                                                                                                                         |
| <p><b>Changeable headers</b></p>                                                         | <p>Können entweder am Anfang einer Datei zusammen mit den konstanten Headern stehen oder auch woanders im File. Veränderbare Header enthalten Informationen, die sich innerhalb eines Files verändern können.</p> <p>@Activity: wenn angegeben wird, das etwas bestimmtes gemacht wird wie Vorlesen oder Basteln</p> <p>@Comment: jede Art von Info kann durch die @Comment Zeile angezeigt werden. Wenn der Kommentar auf eine bestimmte Äußerung referiert, verwende die &amp;com Zeile. Wenn der Kommentar für einen größeren Abschnitt gilt, die @Comment Zeile. Gilt der Kommentar für die gesamte Datei, steht @Comment bei den konstanten Headern vor der ersten Äußerung, sonst vor dem jeweiligen Abschnitt, auf den die Zeile referiert. Z. B. verwenden, wenn ein Geschwisterkind die ganze Zeit mit im Raum ist.</p> <p>@Location: im Wohnzimmer (frage ich noch nach, ob es immer derselbe Raum war)</p> <p>@New Episode: Wenn die Aufnahme eines Tages geteilt wurde, dadurch anzeigen, wo der neue Abschnitt beginnt (also Aufnahme als eine Datei transkribieren). Enthält keinen Doppelpunkt am Ende (wie die anderen Header), da keine weitere Beschreibung erfolgt – sofern das nötig ist, durch die @Comment Zeile ergänzen</p> |
| <p><b>* (main lines)</b></p>                                                             | <p>Damit beginnen alle Sprechzeilen→ z. B.</p> <p>*CHI: (Sternchen, SprecherID aus 3 Buchstaben, Doppelpunkt, Leerzeile)</p> <p>*MOT:</p> <p>*FAT:</p>                                                                                                                                                                                                                                                                                                                                                                                                                                                                                                                                                                                                                                                                                                                                                                                                                                                                                                                                                                                                                                                                                              |
| <p><b>% (Dependent tiers)</b></p>                                                        | <p>Damit beginnen Zeilen, die Erklärungen liefern (stehen direkt unter der main line und kommentieren diese in einer bestimmten Form). Haben kein Satzzeichen am Ende (außer MOR und GRASP – die aber hier unwichtig).</p> <p>%com: → Kommentare können notiert werden</p> <p>%sit: → Informationen zur Situation, die nur für die spezifische Äußerung relevant ist. @Situation, wenn es für die gesamte</p>                                                                                                                                                                                                                                                                                                                                                                                                                                                                                                                                                                                                                                                                                                                                                                                                                                       |

|                                                              |                                                                                                                                                                                                                                                                                                                                                                                       |
|--------------------------------------------------------------|---------------------------------------------------------------------------------------------------------------------------------------------------------------------------------------------------------------------------------------------------------------------------------------------------------------------------------------------------------------------------------------|
|                                                              | Aufnahme wichtig ist<br>%act: → charakterisiert die Spielaktivität (malen, basteln etc.)                                                                                                                                                                                                                                                                                              |
|                                                              | Jede transkribierte Datei muss mit dieser Zeile enden (kein Punkt danach)                                                                                                                                                                                                                                                                                                             |
| <b>Wörter – Codiermöglichkeiten</b>                          |                                                                                                                                                                                                                                                                                                                                                                                       |
| @ wird immer am Ende des Wortes hinzugefügt                  | Die deutsche Rechtschreibung beachten (Substantive, Substantivierungen, Eigennamen etc. groß)                                                                                                                                                                                                                                                                                         |
| @b                                                           | Babbling → z.B. abame@b                                                                                                                                                                                                                                                                                                                                                               |
| @c                                                           | Child-invented form → z. B. gumma@c (= sticky)                                                                                                                                                                                                                                                                                                                                        |
| @f                                                           | Family-specific form<br>→ gongga@f [: Klingel]<br>→ Nana@f [: Lilly]<br>(Äußerungen vom Kind, die von der ganzen Familie übernommen worden sind)                                                                                                                                                                                                                                      |
| @o                                                           | Onomatopöie – Lautmalerei (beinhalten Tierlaute und Versuche, natürliche Geräusche zu imitieren)<br><br>→ woofwoof@o [= für das Bellen eines Hundes]<br>→ didam@o [= das Klingeln der Haustür]                                                                                                                                                                                        |
| @si                                                          | Wenn das Kind ein Wort oder ein nicht-Wort singt → lalaleloo@si.<br><br>Wenn eine längere Äußerung gesungen wird, ist es besser es normal zu transkribieren und es über die dependent line (%sin) als gesungen zu kommentieren                                                                                                                                                        |
| <b>Nicht identifizierbares bzw. unvollständiges Material</b> |                                                                                                                                                                                                                                                                                                                                                                                       |
| xxx                                                          | xxx = Unverständliche Äußerungen (vor und nach xxx steht eine Leerzeile, stehen sie alleine in einer main line, folgt ein Punkt nach dem Leerschlag)<br><br>→ man kann z. B. noch @b hinzufügen, wenn die Äußerung unverständlich und gebrabbelt ist                                                                                                                                  |
| &=vocalizes                                                  | Von Behrens statt xxx verwendet, sofern eine gemurmelte Sequenz einer Äußerung vorausgeht – dann verwenden, wenn das Kind im Anschluss an die unverständliche Äußerung noch eine verständliche Äußerung produziert<br><br>*CHI: &=vocalizes Messer . (vor Messer also eine unverständliche Sequenz)<br>*CHI: &=vocalizes das is(t) vier .                                             |
| &<br>(generelle Erklärung)                                   | Steht am Anfang einer Äußerung, um anzuzeigen, dass das folgenden sprachliche Material nur ein phonologisches Fragment oder ein Stück eines Wortes ist und CLAN es deshalb nicht als Wort behandeln soll. Das Symbol darf nie in Kombination mit einem Fragezeichen, Ausrufezeichen oder Punkt verwendet werden. Material, dass dem Symbol direkt folgt, wird nicht zu MLU gerechnet. |
| www                                                          | Wird in der main line verwendet, wenn man nicht weiß, wie man etwas transkribieren soll oder einen Abschnitt nicht transkribieren möchte. www muss immer durch eine %com Zeile erklärt werden.                                                                                                                                                                                        |

|                                                      |                                                                                                                                                                                                                                                                                                                                                                                                                                                                                                                                                                                                                                                                                                                                                                                                                                                                                                                                                                                                                                                                                                                                                                                                                                                                                                                                                                                                                                                                                                                                             |
|------------------------------------------------------|---------------------------------------------------------------------------------------------------------------------------------------------------------------------------------------------------------------------------------------------------------------------------------------------------------------------------------------------------------------------------------------------------------------------------------------------------------------------------------------------------------------------------------------------------------------------------------------------------------------------------------------------------------------------------------------------------------------------------------------------------------------------------------------------------------------------------------------------------------------------------------------------------------------------------------------------------------------------------------------------------------------------------------------------------------------------------------------------------------------------------------------------------------------------------------------------------------------------------------------------------------------------------------------------------------------------------------------------------------------------------------------------------------------------------------------------------------------------------------------------------------------------------------------------|
| Text(text)text                                       | <p>Wenn ein Wort unvollständig ist, aber die intendierte Bedeutung klar ist, wird der fehlende Teil in Klammern ergänzt. (Wenn der Teil nicht verständlich und unklar ist, durch xx innerhalb des Wortes angezeigt)</p> <p>nich(t), is(t), (Ele)fant, ma(l), jetz(t), wollt(e)st, hätt(e)st, gern(e), besor(gen) etc.</p> <p>Bei definitivem und indefinitem Artikel die fehlenden Segmente ergänzen:<br/> de zu de(r) oder d(i)e<br/> m Tisch zu (de)m Tisch<br/> 'ne zu (ei)ne<br/> 'n zu (ei)n<br/> ein zu ein(en)</p> <p>Bei Partizip II (ge) in Klammern ergänzen, wenn es fehlt:<br/> rum(ge)tragen oder run(g)etragen</p> <p>Bei Präfixen:<br/> Wenn Präfixe fehlen, in runden Klammern ergänzen, wenn klar ist, was das Kind gemeint hat (da unbetonte Präfixe oft von Kindern verschluckt werden)<br/> *CHI: hab ich (ver)standen</p> <p>Wenn es nicht klar ist (und der Kontext kein Aufschluss gibt), werden die Konventionen für alternative Transkriptionen verwendet:<br/> *CHI: Mama zählt [=? (er)zählt]</p> <p>Wenn nur das Verbalpräfix produziert wird, der Kontext aber darauf schließen lässt, dass ein Verb gemeint ist, wird eine alternative Transkription angegeben:<br/> *CHI: vor [=? vor(lesen)]</p> <p>AUSNAHME Verbformen: Infinitiv, 1. Person und 3. Person Plural – enden auf –en und der Schwa ist typischerweise im Deutschen verschluckt. Deshalb werden diese Formen direkt ohne Angabe von ( ) als Standardformen transkribiert:<br/> machn – machen<br/> ham, haben – haben<br/> könn'n – können</p> |
| <b>Komposita, Verknüpfungen, Akronyme und Zahlen</b> |                                                                                                                                                                                                                                                                                                                                                                                                                                                                                                                                                                                                                                                                                                                                                                                                                                                                                                                                                                                                                                                                                                                                                                                                                                                                                                                                                                                                                                                                                                                                             |
|                                                      | Gewöhnliche Komposita (Apfelbaum) werden als 1 Wort transkribiert!!                                                                                                                                                                                                                                                                                                                                                                                                                                                                                                                                                                                                                                                                                                                                                                                                                                                                                                                                                                                                                                                                                                                                                                                                                                                                                                                                                                                                                                                                         |
| Unterstrich _                                        | <p>Buchtitel und Songtexte: Winnie_der_Bär oder Stille_Nacht</p> <p>Akronyme: L_K_W oder U_S_A</p> <p>Orte: Hongkong_University</p> <p>Namen: Tante_Ida, Rasender_Roland</p>                                                                                                                                                                                                                                                                                                                                                                                                                                                                                                                                                                                                                                                                                                                                                                                                                                                                                                                                                                                                                                                                                                                                                                                                                                                                                                                                                                |
| _ und @o<br>(siehe unten zu @o)                      | <p>bei fixed phrases und Ausrufen wie:</p> <p>ach_du_lieber_Gott@o</p> <p>ach_Gott@o</p> <p>ach_du_meine_Güte@o</p>                                                                                                                                                                                                                                                                                                                                                                                                                                                                                                                                                                                                                                                                                                                                                                                                                                                                                                                                                                                                                                                                                                                                                                                                                                                                                                                                                                                                                         |

| Aus- u. Zwischenrufe (Diskursmarker)             |                                                                                                                                                                                                                                                                                                                                                                                                                                                              |
|--------------------------------------------------|--------------------------------------------------------------------------------------------------------------------------------------------------------------------------------------------------------------------------------------------------------------------------------------------------------------------------------------------------------------------------------------------------------------------------------------------------------------|
| @o für Aus- u. Zwischenrufe                      | Nicht nur für Onomatopöie, sondern auch für Aus- u. Zwischenrufe (Interjektionen) und andere Diskursmarker. Die folgenden Formen (linke Spalte) sollten auch verwendet werden, wenn die tatsächliche phonologische Form davon abweicht, so lange sie der hier verwendeten ähnelt:                                                                                                                                                                            |
| mmhm@o                                           | zustimmendes Geräusch                                                                                                                                                                                                                                                                                                                                                                                                                                        |
| mm@o                                             | verneinendes Geräusch, unzufriedenes Geräusch                                                                                                                                                                                                                                                                                                                                                                                                                |
| nee@o                                            | Verneinung                                                                                                                                                                                                                                                                                                                                                                                                                                                   |
| ne@o ?                                           | tag-question                                                                                                                                                                                                                                                                                                                                                                                                                                                 |
| ah@o                                             | Exklamation (Erleichterung)                                                                                                                                                                                                                                                                                                                                                                                                                                  |
| mmm@o                                            | schmeckt gut                                                                                                                                                                                                                                                                                                                                                                                                                                                 |
| ahhah@o                                          | Entdeckung, Feststellung                                                                                                                                                                                                                                                                                                                                                                                                                                     |
| hm@o                                             | überlegen, warten                                                                                                                                                                                                                                                                                                                                                                                                                                            |
| hä@o                                             | fragendes Geräusch                                                                                                                                                                                                                                                                                                                                                                                                                                           |
| hui@o                                            | zufriedenes Geräusch                                                                                                                                                                                                                                                                                                                                                                                                                                         |
| och@o                                            | enttäushtes Geräusch                                                                                                                                                                                                                                                                                                                                                                                                                                         |
|                                                  | <p>Weitere Beispiele:</p> <p>*MOT: na@o , dann tu sie rein</p> <p>*MOT: oh@o , Leo</p> <p>*CHI: nee@o , ganz viele aufbau(en)</p> <p>*MOT: was is(t) los , hä@o</p> <p>*MOT: ach@o stimmt</p> <p>*MOT: naja@o , vielleicht geht (e)s ja sogar .</p>                                                                                                                                                                                                          |
| Codierung von Äußerungen                         |                                                                                                                                                                                                                                                                                                                                                                                                                                                              |
| [=! Text]                                        | <p>hiermit wird angezeigt, dass das Kind schreit, während es “meins” sagt:</p> <p>*CHI: das is(t) meins [=! schreit]</p> <p>Soll der ganze Ausdruck erfasst werden (also wenn das Kind die gesamte Äußerung schreit), muss folgende Form gewählt werden:</p> <p>*CHI: &lt;das is(t) meins&gt; [=! schreit]</p>                                                                                                                                               |
| &=hustet<br>&=schreit<br>&=lacht<br>&=weint etc. | <p>Mit der &amp;=Text Option wird <b>nicht</b> angezeigt, dass die gesamte Äußerung z. B. gelacht ist, sondern nur vor, innerhalb oder nach der Äußerung gelacht wird. Das Lachen bezieht sich hier nicht auf ein Wort.</p> <p>*CHI: &amp;=lacht Quall(e) anfassen .</p> <p>*CHI: das is(t) meins &amp;=weint .</p> <p>weitere zugefügte Zeichen:</p> <p>&amp;=summt</p> <p>&amp;=schnieft</p> <p>&amp;=niest</p> <p>&amp;=grunzt</p> <p>&amp;=hufenklap</p> |

|                                          |                                                                                                                                                                                                                                                                                                                                                                                                                                                                                                                                              |
|------------------------------------------|----------------------------------------------------------------------------------------------------------------------------------------------------------------------------------------------------------------------------------------------------------------------------------------------------------------------------------------------------------------------------------------------------------------------------------------------------------------------------------------------------------------------------------------------|
|                                          | ern<br>&=schmatzt<br>&=schnurrt<br>&=flüstert<br>&=hustet<br>&=schnalzt                                                                                                                                                                                                                                                                                                                                                                                                                                                                      |
| &=isst<br>&=trinkt                       | Hier steht der Code für das Geräusch (For actions such &=eat the code represents the auditory results of eating)                                                                                                                                                                                                                                                                                                                                                                                                                             |
| [: text]<br>(Assimilation)               | Wird verwendet, wenn die intendierte Wortform klar ist, aber die Abweichung davon keine Auslassung (dann runde Klammern wählen), sondern eine Ersetzung ist (assimilierte Form):<br><br>*CHI: Dunnel [: Tunnel]<br>*CHI: Guckag [: Geburtstag]<br>*CHI: Hast de [: du]<br>*CHI: wollen wer [: wir] mal<br>*CHI: eine Grase [: Straße] machen<br>*MOT: machen wir auch (ei)nen Prelburg [: Prellblock] hin ?<br>*CHI: aber ich mag dat [: das] nich(t)<br><br>englische Beispiele:<br>gonna [: going to], gimme [: give me], lemme [: let me] |
| [=? text]                                | Schlägt eine alternative Transkription vor [=? text], wenn nicht klar ist, was genau das Kind meint<br><br>*CHI: kuh [=? du]<br><br>*CHI: krank(enwagen) [=? krank(enhaus)]<br><br>*CHI: hm@o [=? hier]<br><br>*CHI: bahnhof [=? bauernhof]                                                                                                                                                                                                                                                                                                  |
| [?]<br>(best guess)                      | Wenn man glaubt, das Wort erkannt zu haben, aber sich dennoch nicht 100% sicher ist (Restunsicherheit besteht)<br><br>*CHI: ich will ein(en) frosch [?] . – hier also auf Frosch bezogen<br><br>wenn mehr als 1 Wort unsicher ist, die unsicheren Wörter in spitzen Klammern rahmen:<br><br>*CHI: ich will <ein(en) frosch> [?] .                                                                                                                                                                                                            |
| Text(text)test<br>Abkürzungen<br>s. oben | Bei Abkürzungen innerhalb von Wörtern werden die fehlenden Teile durch runde Klammern () ergänzt:<br><br>*CHI: was ist ´n das – was ist (den)n das                                                                                                                                                                                                                                                                                                                                                                                           |
| <b>Satzzeichen</b>                       |                                                                                                                                                                                                                                                                                                                                                                                                                                                                                                                                              |
|                                          | Immer ein Leerzeichen lassen zwischen dem letzten Wort einer Äußerung und dem Satzzeichen!                                                                                                                                                                                                                                                                                                                                                                                                                                                   |
| ?                                        | (= Leerzeichen + Fragezeichen)<br>Ende einer Frage oder einer steigenden Intonation                                                                                                                                                                                                                                                                                                                                                                                                                                                          |
| !                                        | (= Leerzeichen + Ausrufezeichen)<br>Ende eines Imperativs oder einer emphatischen Äußerung                                                                                                                                                                                                                                                                                                                                                                                                                                                   |

|                                                                                                               |                                                                                                                                                                                                                                                                                                                                                          |
|---------------------------------------------------------------------------------------------------------------|----------------------------------------------------------------------------------------------------------------------------------------------------------------------------------------------------------------------------------------------------------------------------------------------------------------------------------------------------------|
| .                                                                                                             | (= Leerzeichen + Punkt)<br><br>der Punkt markiert das Ende einer Äußerung einer unmarkierten (deklarativen) Aussage<br><br>Der Punkt darf nicht für Abkürzungen verwendet werden – Abkürzungen generell vermeiden!!                                                                                                                                      |
| ,                                                                                                             | (= Leerzeichen + Komma)<br><br>ein Komma hat die normale Verwendung (auch Leerzeichen + Komma)<br>auch verwenden für Fälle wie:<br><br>*MOT: you are coming home , aren't you ?<br><br>*MOT: Das is(t) schön , ne .                                                                                                                                      |
| <b>Pausen, zwischenschaltende (back channel &amp; side channel), unvollständige, unterbrochene Äußerungen</b> |                                                                                                                                                                                                                                                                                                                                                          |
| (.) (..) (...)                                                                                                | Angabe von Pausen in kurz (.) mittel (..) und lang (...)<br><br>I don't (...) know .                                                                                                                                                                                                                                                                     |
| Back channel<br>&*MOT:ja<br>&*MOT:mhm<br>&*MOT:X                                                              | Zwischenruf in einer Äußerung durch ein Wort oder kurzen Kommentar eines anderen Sprechers, durch den die Sequenz des Sprechers aber nicht abgebrochen wird. Der Zwischenruf bezieht sich auf die Äußerung des anderen Sprechers (back channel) vs. side channel (s. nächste Spalte)<br><br>*CHI: Als ich unten war &MOT:mhm hab ich die Katze gesehen . |
| Side channel<br>[+bch]                                                                                        | Äußerungen, wenn die Mutter z. B. mit dem Kind spricht und sich plötzlich an eine weitere Person wendet, um ihr etwas zu sagen<br><br>*CHI: here one .<br>*MOT: no , here .<br>%sit: the doorbell rings .<br><br>*MOT: just a moment . [+ bch]<br>*MOT: I'll get it . [+ bch]                                                                            |
| +...                                                                                                          | Zeigt an, dass eine Äußerung unvollständig ist, aber beendet und nicht von einem anderen unterbrochen wurde – kommt vor, wenn die Aufmerksamkeit eines Sprechers auf etwas neues gerichtet wird<br><br>*MOT: smells good enough for +...<br><br>*MOT: what is that ?                                                                                     |
| +..?                                                                                                          | Unvollständige, nicht von einem anderen unterbrochene Äußerung mit der Gestalt einer Frage                                                                                                                                                                                                                                                               |
| +/.                                                                                                           | Unterbrechung durch einen anderen Sprecher<br><br>*MOT: what did you +/.<br><br>*CHI: Mommy .<br><br>*MOT: +, with your spoon .                                                                                                                                                                                                                          |
| +,                                                                                                            | Symbol zu Beginn einer Äußerung, wenn eine zuvor durch einen anderen Sprecher verursachte Äußerung noch vervollständigt wird. Wichtig ist, dass                                                                                                                                                                                                          |

|                                                 |                                                                                                                                                                                                                                                                                                      |
|-------------------------------------------------|------------------------------------------------------------------------------------------------------------------------------------------------------------------------------------------------------------------------------------------------------------------------------------------------------|
|                                                 | auch die unvollständige unterbrochene Äußerung gekennzeichnet sein muss (am Ende durch +/.)<br>Siehe Beispiel darüber!                                                                                                                                                                               |
| +/?                                             | Unterbrechung einer Frage durch einen anderen Sprecher                                                                                                                                                                                                                                               |
| ++                                              | Einklinken oder Vollendung einer Äußerung durch einen anderen Sprecher<br>*MOT: if Bill had known +/.<br>*CHI: ++ he would have come .                                                                                                                                                               |
| +<<br>(Überlappung von<br>2 Äußerungen)         | Wenn man nicht genau anzeigen will, ab wann sich Äußerungen von 2 Sprechern überlappen, eben nur, dass sie überlappen. Das Zeichen wird zu Beginn der Äußerung angeführt, die mit einer vorausgehenden Äußerung überlappt:<br>*CHI: we were taking them home .<br>*MOT: +< they had to go in here .  |
| <b>Wiederholungen, Um- und Reformulierungen</b> |                                                                                                                                                                                                                                                                                                      |
| [/]                                             | Wird verwendet, wenn ein Sprecher etwas sagt, stoppt und dann das vorherige Material ohne Veränderung wiederholt. Es kann sich um ein Wort oder mehrere Wörter handeln (bei mehreren Wörtern diese in spitze Klammern einrahmen):<br>*CHI: <I wanted> [/] I wanted to invite Margie .                |
| Mehrfach-<br>wiederholung<br>Text [x N]         | Wird ein Wort öfters als 1mal wiederholt:<br>*CHI: milk [x 4] . → *CHI: milk milk milk milk .                                                                                                                                                                                                        |
| [//]                                            | Wenn man etwas Gesagtes wiederholt und es umformuliert, aber die Idee dieselbe bleibt<br>*CHI: <I wanted> [//] uh I thought I wanted to invite Margie .                                                                                                                                              |
| [///]                                           | Reformulierung<br>Wenn etwas Gesagtes komplett umformuliert wird ohne spezifische Korrekturen der Äußerung<br>*MOT: all of my friends had [///] we had decided to go home for lunch .<br>*CHI: <ich sollte> [//] ich muss jetzt gehen                                                                |
| <b>Symbole beim Vorlesen von Geschichten</b>    |                                                                                                                                                                                                                                                                                                      |
| +"                                              | Wird zusammen mit den beiden nachfolgenden Symbolen verwendet, um anzuzeigen, dass Äußerungen direkt zitiert werden                                                                                                                                                                                  |
| +"/.<br>(Zitat folgt)                           | Zeigt an, dass ein Zitat folgt. Kommt häufig beim Erzählen von Geschichten vor, um anzuzeigen, dass die Äußerungen Zitate aus dem Buch sind.<br>*CHI: und der kleine Bär sagt +"/.<br>*CHI: +" gibt mir bitte deinen ganzen Honig .<br>*CHI: +" wenn du das machst , trage ich dich auf dem Rücken . |
| +".<br>(Zitat geht voran)                       | Zeigt an, dass ein Zitat vorausgegangen ist:<br>*CHI: +" gib mir bitte deinen ganzen Honig .<br>*CHI: sagte der kleine Bär +".                                                                                                                                                                       |
