# Supplementary material
Source: publisher site journal article supplement (https://www.degruyterbrill.com/publication/isbn/9783110623857/downloadAsset/9783110623857_Digitaler%20Anhang.zip)
Supplement: Supplementary file 6 [file Fehlertyp_VI.xlsx]

## Sheet: fehlgeschlagene_TB
syntaktisch Fehlgeschlagene Tracebacks:	mögliche Erklärung	Korpusbelege für mögliche Schemata	Korpus Bezugsperson (B) vs. Kind (C)	Notizen/Gedanken	Fehlertypen:	Kind
vielleicht kommt noch ein Nachtzug der in der Nacht fährt der in der [REF][PRO] Nacht fährt failed: vielleicht kommt noch ein Nachtzug (add not allowed) ABER: [adv] kommt noch [REF] findet sich empirisch, die Kombination mit dem Relativsatz ist das Problem!	f)	Beispiele für "Hauptsatz": *MUT: brumm [x 5] und hier kommt noch ein anderes Flugzeug angeflogen . %mor: on|brumm conj|und adv|hier v|kommen-PRES&3s adv|noch adjm|ein&det&n&sg&nom&acc adjm|ander&det-es n|Flugzeug&n&sg&nom&acc an#ge#part|fliegen-PASTP1 . *MUT: und dann kommt noch die Tanja zu Besuch , Leo . %mor: conj|und adv|dann v|kommen-PRES&3s adv|noch det|die n:prop|Tanja prep|zu n|Besuch&m&s…	B	Relativsatzanbindung! Genau hier zeigt sich die Grenze der Methode: Es bleibt die Frage, wie unterschiedliche Konstruktionen miteinander verknüpft werden. Also welche Regeln da gelten - add, aber wie restringieren? [adv] kommt noch [REF]	f) es handelt sich um zwei Konstruktionen, die miteinander kombiniert werden müssen. Die bisherige add-Definition erlaubt dies nicht - die Frag ist, welche Restriktionen müssen dafür angenommen werden, dass "add" erlaubt wird.	Leo
und das passt gar nicht da gerade rein das passt gar nicht +und (add) da [ADV] rein gerade failed: die Kombination der beiden Konstruktionen ist nicht zulässig über add	f)	1. Schema: *CHI: un(d) das pass(t) gar nich(t) . %mor: conj|und pro|das v|passen-PRES&23s2p adv|gar adv|nicht . *MOT: oh@o , das passt gar nich(t) . %mor: on|oh cm|cm pro|das v|passen-PRES&23s2p adv|gar adv|nicht . 2. Schema: *CHI: da lieber rein . %mor: adv:loc|da adv|lieer vpfx|rein . *MOT: passt die da nicht rein ? %mor: v|passen-PRES&23s2p pro|die adv:loc|da adv|nicht vpfx|rein ? *CHI: da rei…	B, C			Marieke
nein bei mir unter Beine unter [REF] Beine -bei mir- +nein (add) failed: die Kombination der beiden Konstruktionen ist nicht zulässig über add	f)	*CHI: so [x 2] ich muss die mal da alle bei mir bleiben . %mor: adv|so pro:per|ich mod|müssen-PRES&13s pro|die adv|mal adv:loc|da adjm|all&det-e prep|bei pro:per|mir vinf|bleiben-INF . *CHI: mmhm@o und der hat xxx kann bei mir wohnen . %mor: on|mmhm conj|und pro|der v|haben-PRES&3s mod|können-PRES&13s prep|bei pro:per|mir vinf|wohnen-INF . *CHI: Mama , du bei mir malen . %mor: n|Mama&f&sg cm|cm p…	C			Marieke
ich male etwas das grün ist an ich male etwas an das [ATT] ist grün failed: die Kombination der beiden Konstruktionen ist nicht zulässig über add	f)	1. Schema: *CHI: ich mal(e) etwas an , wo ist denn ein Stift , ich nehm(e) mir ein(en) Stift . %mor: pro:per|ich v|malen-PRES&1s pro|etwas vpfx|an cm|cm pro:int|wo cop|sein&PRES&3s adv|denn adjm|ein&det&m&sg&nom n|Stift&m&sg&nom cm|cm pro:per|ich v|nehmen-PRES&1s pro:per|mir adjm|ein&det&m&sg&acc-en n|Stift&m&sg&acc . *CHI: ich mal(e) etwas an . %mor: pro:per|ich v|malen-PRES&1s pro|etwas vpfx|an…	B, C	eingeschobener Relativsatz kann nicht integriert werden obwohl die Schemata einzeln ableitbar sind		Merit
wir bauen einen Stall hier hin wir bauen [REF] einen Stall failed: hier hin (add not allowed)	f)	*CHI: wir bauen ein(en) Eiltor [: Eulenturm] . %mor: pro:per|wir v|bauen-PRES&13p adjm|ein&det&m&sg&acc-en n|Eulenturm&m&sg&acc . *MOT: ich dacht(e) wir bauen einen Stall , für die Kuh . %mor: pro:per|ich v|denken&PAST&13S-PAST&13s pro:per|wir v|bauen-PRES&13p adjm|ein&det&m&sg&acc-en n|Stall&m&sg&acc cm|cm prep:nloc|für det|die&f&sg&nom&acc n|Kuh&f&sg&nom&acc .	B, C	der Chunk "hier hin" findet sich mehr als 20 mal im Korpus		Merit
ich will hier noch ein Zaun hinstellen hier noch ein [REF] [PRO] Zaun [PRO] hinstellen failed: ich will (add not allowed)	f)	*MOT: guck mal , wenn wir hier noch ein bisschen Rand hinbauen . %mor: vimp|gucken&IMP&2s adv|mal cm|cm conj|wenn pro:per|wir adv:loc|hier adv|noch adjm|ein&det n|bisschen&sg n|Rand&m&sg hin# vinf|bauen-INF . *MOT: nee@o , du hast hier noch ein Tuch liegen , Merit . %mor: on|nee cm|cm pro:per|du aux|haben-PRES&2s adv:loc|hier adv|noch adjm|ein&det&n&sg&nom&acc n|Tuch&n&sg&nom&acc vinf|liegen-INF …	B	der Chunk "ich will" findet sich mehr als 20 mal im Korpus		Merit
und hat geguckt ob es in Ordnung ist und hat [PRO] (hat) gesehen ob es [REF] [PRO] in Ordnung ist failed: die Kombination der beiden Konstruktionen ist nicht zulässig über add	f)	1) Schema: *MOT: und hat gesehen , oh@o ,da sind ja Eicheln . %mor: conj|und aux|haben-PRES&3s ge#part|sehen-PASTP1 cm|cm on|oh cm|cm adv:loc|da cop|sein&PRES&13 co|ja n|Eichel&f-pl . *MOT: und hat gesagt wir puzzeln jetzt mal . %mor: conj|und aux|haben-PRES&3s ge#part|sagen-PASTP2 pro:per|wir v|puzzeln-PRES&13p adv|jetzt adv|mal . 2) Schema: *MOT: ob es hier noch ein anderes Vögelchen gibt . %mo…	B			Merit
und da hinten hing die Jacke von dem Eichhörnchen da [LOC] [PRO] die [REF] -und (da) hinten- hing (die) Jacke von dem [REF] Eichhörnchen failed: die Kombination der beiden Konstruktionen ist nicht zulässig über add	f)	Schema 1: *CHI: und da unten leichen [: leuchten] die Laternen . %mor: conj|und adv:loc|da adv:loc|unten v|leuchten-PRES&13p det|die&pl&nom&acc n|Laterne&f&nom&acc-pl . *MOT: da oben machen die Pause , ne@o . %mor: adv:loc|da adv:loc|oben v|machen-PRES&13p det|die&f&sg&nom&acc n|Pause&f&sg&nom&acc cm|cm on|ne . Schema 2: *CHI: von dem Kind . %mor: prep|von det|dem&n&sg&dat n|Kind&n&sg&dat . *CHI:…	B, C			Merit
und jetzt spielen wir ohne Gerät und jetzt [PRO] wir spielen (wir) ohne [REF] Gerät failed: die Kombination der beiden Konstruktionen ist nicht zulässig über add	f)	1. Schema: *FAT: ja , und jetzt malen wir hier . %mor: co|ja cm|cm conj|und adv|jetzt v|malen-PRES&13p pro:per|wir adv:loc|hier. *MOT: und jetzt brauchen wir aber hier eine Verbindung . %mor: conj|und adv|jetzt v|brauchen-PRES&13p pro:per|wir conj|aber adv:loc|hier adjm|ein&det&f&nom&acc-e n|Verbindung&f&sg&nom&acc . 2. Schema: *MOT: ohne Punkt und ohne Komma . %mor: prep:nloc|ohne n|Punkt&m&sg c…	B, C			Merit
im Bett Giraffe im Bett failed: Giraffe (add not allowed)	f)			es tritt kein Schema mit einem anderen Slot auf wie beispielsweise im Bett [PRO] auch nicht sowas wie im Bett ist [REF] oder im Bett ist es [ATT]		Simon
