# Supplementary material
Source: publisher site journal article supplement (https://www.degruyterbrill.com/publication/isbn/9783110623857/downloadAsset/9783110623857_Digitaler%20Anhang.zip)
Supplement: Supplementary file 7 [file Fehlertyp_VII.xlsx]

## Sheet: fehlgeschlagene_TB
syntaktisch Fehlgeschlagene Tracebacks:	mögliche Erklärung	Korpusbelege für mögliche Schemata	Korpus Bezugsperson (B) vs. Kind (C)	Notizen/Gedanken	Fehlertypen:	Kind
die liegt im Bett und schläft [REF] liegt im [REF] die (im) Bett +und schläft (failed, add not allowed)	g)	*MOT: hm@o , das große Indianerpferd , ne@o , das liegt im [/] im Zelt . %mor: on|hm cm|cm det|das&n&sg&nom&acc adjm|groß-e n|Indianerpferd&n&sg&nom&acc cm|cm on|ne cm|cm pro|das v|liegen-PRES&3s prep|in~det|dem n|Zelt&n&sg . *MOT: mmhm@o , genau , der liegt im Bett , ne@o ? %mor: on|mmhm cm|cm co|genau cm|cm pro|der v|liegen-PRES&3s prep|in~det|dem n|Bett&n&sg cm|cm on|ne ?	B	"und schläft" als eigenständige Konstruktion - "und die schläft" - es handelt sich hier also um eine eliptische Konstruktion	g) eliptische Konstruktionen oder solche, in denen die Informationsstruktur verschoben ist (Links- und Rechtsversetzung, Freies Thema, Extraposition nach Altmann 1981) und als Herausstellungsstrukturen bezeichnet werden (Altmann 1981) - die Begriffe werden hier deskriptiv verstanden und nicht als Transformationsregeln im Sinne eines generativen Ansatzes. (s. Lindner 2014)	Merit
und da ist grün und weiß und gelb da ist [ATT] grün +und (add) + und weiß und gelb (failed: add not allowed)	g)	*CHI: da is(t) blau und rot . %mor: adv:loc|da cop|sein&PRES&3s adj|blau conj|und adv|rot . *CHI: da ist grün . %mor: adv:loc|da cop|sein&PRES&3s adj|grün .	C	die add-Strategie ist bisher so restringiert, dass Konjunktion + Adjektiv (Eigenschaft) nicht erlaubt ist wieder eliptische Konstruktioen: "und da ist weiß und da ist gelb"		Merit
der kann das tragen die Puppen [REF] kann das [PRO] der (kann) tragen failed: die Puppen (add not allowed)	g)	*CHI: auch der Mau [: Bauer] kann das mal machen . %mor: adv|auch det|der&m&sg&nom n|Bauer&m&sg&nom mod|können-PRES&13s pro|das adv|mal vinf|machen-INF . *CHI: aber die &=vocalizes die kann das s(ch)ieben . %mor: conj|aber pro|die pro|die mod|können-PRES&13s pro|das vinf|schieben-INF .	C	die Puppen bezieht sich auf das- es handelt sich um eine Rechtsversetzung ins Nachfeld: rechtsversetzte Konstituente spezifiziert hier noch einmal auf welches Objekt das Demonstrativpronomen referiert		Merit
und von gestern den hast du gemalt [REF] hast du [PRO] den gestreichelt failed: und von gestern (add not allowed)	g)	*MOT: was für ein Tier hast du denn gestreichelt am Sonntag ? %mor: pro|was prep:nloc|für adjm|ein&det&n&sg&nom&acc n|Tier&n&sg&nom&acc v|haben-PRES&2s pro:per|du adv|denn ge#part|streicheln-PASTP2 prep|an~det|dem n|Sonntag&m&sg ? *FAT: das hast du runtergeschmissen , ne@o ? %mor: pro|das v|haben-PRES&2s pro:per|du runter#ge#part|schmeißen-PASTP1 cm|cm on|ne ?	B	es handelt sich um eine Linksversetzung einer Konstituente aus dem Mittelfeld vor das Vorfled, also in das Vor-Vorfeld. Die Konstituente wird mit einem korreferenten Demonstrativpronomen im Vor- oder Mittelfeld wieder aufgenommen Im Korpusbeispiel sieht man allerdings, dass die Mutter durchaus Versetzungen verwendet, hier alledings eine Rechtsversetzung		Merit
und deshalb sind die traurig die kleinen Schneeflöckchen deshalb [PRO] [REF] [ATT] sind die traurig +und (add) die kleinen [REF] Schneeflöckchen failed: add der Rechtsversetzung not allowed	g)	*MOT: und derjenige lag unter dem Schnee , deshalb ist der so blass . %mor: conj|und pro|derjenige v|liegen&PAST&13s prep|unter det|dem&m&sg&dat n|Schnee&m&sg&dat cm|cm adv|deshalb cop|sein&PRES&3s pro|der adv|so adj|blass . *MOT: +" ja eben , deshalb is(t) (es) so schwer . %mor: co|ja adj|eben cm|cm adv|deshalb cop|sein&PRES&3s pro:per|es co|ja adv|so adj|schwer .	C	[PRO]-Slot auf cop restringiert Rechtsversetzung von "die kleinen Schneeflöckchen"		Merit
und dann fährt sie hier weg mit dem Auto dann [PRO] [REF] [LOC] [PRO] fährt sie hier weg +und (add) mit dem Auto (add not allowed)	g)	*CHI: und wenn die ein einmal da Wasser xxx , dann kommt der da raus . %mor: conj|und conj|wenn pro|die adjm|ein&det adv|eins&adj-MAL adv:loc|da n|Wasser&n&sg cm|cm adv|dann v|kommen-PRES&3s pro|der adv:loc|da adv:dir|raus . *CHI: dann passt das da rein . %mor: adv|dann v|passen-PRES&23s2p pro|das adv:loc|da adv:dir|rein .	C	Rechtsversetzung von "mit dem Auto" scheint eine Art Entlastungsstrategie zu sein! Die Integration innerhalb der Aussage ist evtl. noch zu komplex, deshalb wird es ans Ende der Aussage gerückt		Merit
mit Ludger und Susanne waren die hier [REF] [PRO] hier Ludger und Susanne waren failed: mit (add not allowed) failed: die (add not allowed)	g)	*FAT: nein , der Anspitzer ist hier . %mor: co|nein cm|cm det|der&m&sg&nom n|Anspitzer&m&sg&nom cop|sein&PRES&3s adv:loc|hier . *MOT: +" ich bin hier ganz allein . %mor: pro:per|ich cop|sein&PRES&1s adv:loc|hier adv|ganz adj|allein .	B	[PRO]-Slot auf Kopula restringiert		Merit
und die anderen Tiere die sollen nicht da sein [REF] [PRO] nicht [LOC] [PRO] die sollen da sein und (add) failed: die anderen Tiere (add not allowed)	g)	*MOT: +" du darfst nicht in der Nase bohren . %mor: pro:per|du mod|dürfen-PRES&2s adv|nicht prep|in det|der&f&sg&gen&dat n|Nase&f&sg&gen&dat vinf|bohren-INF . *FAT: du sollst nicht auf den Tisch malen . %mor: pro:per|du mod|sollen-PRES&2s adv|nicht prep|auf det|den&m&sg&acc n|Tisch&m&sg&acc vinf|malen-INF .	B	Linksversetzung "die anderen Tiere" (Lindner S. 212) "die anderen Tiere" liegt mehrfach im Korpus als Chunk vor ist das dann noch 1 Äußerung sprich 1 Konstruktion? Merit ist durchaus zu Recht- oder Linksversetzungen fähig: *CHI: da [: der] möcht(e) immer drin sein der Tnoten [: Knoten] . %mor: pro|der mod|mögen-KONJ&13s adv|immer adv:loc|drin vinf|sein&INF det|der&m&sg&nom n|Knoten&m&sg&nom .		Merit
