# Supplementary material
Source: publisher site journal article supplement (https://www.degruyterbrill.com/publication/isbn/9783110623857/downloadAsset/9783110623857_Digitaler%20Anhang.zip)
Supplement: Supplementary file 8 [file Fehlertyp_VIII.xlsx]

## Sheet: fehlgeschlagene_TB
syntaktisch Fehlgeschlagene Tracebacks:	mögliche Erklärung (Fehlertyp)	Korpusbelege für mögliche Schemata	Korpus Bezugsperson (B) vs. Kind (C)	Notizen/Gedanken	Fehlertypen:	Kind
hast du noch mal das da reingetan hast du das [LOC] [PRO] hier reingetan failed: noch mal (add not allowed). Keine Typvariation zur Ableitung des [LOC]-Sltos	c), d)	*MOT: oh@o , hast du das hier abgemacht ? %mor: on|oh cm|cm aux|haben-PRES&2s pro:per|du pro|das adv:loc|hier ab#ge#part|machen-PASTP2 ? *MOT: hast du das hier auch schon rausgenommen ? %mor: aux|haben-PRES&2s pro:per|du pro|das adv:loc|hier adv|auch adv|schon raus#ge#part|nehmen-PASTP1 ?	B			Marieke
da muss ich die Nägeln raus da muss ich failed: die Nägeln raus (add not allowed)	a) ("raus" als adv:dir könnte nicht in PRO-Slot von den Korpusbeispielen am Ende) d) s. Notizen	*MOT: jetzt muss ich erst mal die Blätter machen . %mor: adv|jetzt mod|müssen-PRES&13s pro:per|ich adv|erst adv|mal det|die&pl&nom&acc n|Blatt&n&nom&acc-pl vinf|machen-INF . *MOT: da muss ich mal eine Gabel holen . %mor: adv:loc|da mod|müssen-PRES&13s pro:per|ich adv|mal adjm|ein&det&f&nom&acc-e n|Gabel&f&sg&nom&acc vinf|holen-INF *MOT: jetzt muss ich noch einen Brief wegbringen . %mor: adv|jetzt…	B	"da" nicht lokal gemeint hier! Deshalb auch "jetzt" zulässig, und das wäre mit add erlaubt. "raus" als Richtungsadverb kodiert, könnte aber auch genauso gut Verbpartikel sein - Nägel "rausmachen" oder "rausnehmen" dann wäre es PRO-Slot am Ende und nicht DIR "erst" und "erst mal" verhindern außerdem Übereinstimmung mit Zielstruktur.		Marieke
hey@o lass mich los liebe Oma [PRO] [REF] [PRO] lass mich los +hey@o (add) liebe [REF] Oma failed: es wird nur ein vollständig abstraktes Schema gefunden, allerdings erfüllt dies das Frequenzkriterium nicht und die beiden Schemata dürfen nicht kombiniert werden mit add	b), e), f)	*MOT: nimm mich mit . %mor: vimp|nehmen&IMP&2s pro:per|mich vpfx|mit .	B	wieder die Frage nach der Kombinierbarkeit von Konstruktionen! "liebe Oma" scheint eher eine Art Vokativ zu sein, der ebenfalls wie "hey@o" über add angehängt wird		Marieke
Maria und Josef die haben das Baby [REF]und [REF] die haben [REF] -Maria (und) Josef- -das Baby-	f), g)	Schema 1: *CHI: wo ist Jost und Fregegig [: Frederik] ? %mor: pro:int|wo cop|sein&PRES&3s n:prop|Jost conj|und n:prop|Frederik ? *CHI: Jane und Jane ist auch mit dabei . %mor: n:prop|Jane conj|und n:prop|Jane cop|sein&PRES&3s adv|auch prep:nloc|mit adv|dabei . Schema 2: *CHI: und die haben den Swederfmuck [: Federschmuck] . %mor: conj|und pro|die v|haben-PRES&13p det|den&m&sg&acc n|Federschmuck&m…	C	zwei unabhängige Konstruktionen, die miteinander kombiniert werden müssen "Maria und Josef" ist eine Linksversetzung		Merit
deshalb habe ich dem Braunbär gesagt dass er das nicht soll [adv] [PRO] [REF] gesagt desahlb habe ich failed: dem Braunbär dass [REF] das [PRO] er nicht soll	d) f)	1 Schema: *MOT: und dann hab(e) ich gesagt , oh@o , ich hätte auch gerne einen Zug . %mor: conj|und adv|dann v|haben-PRES&1s pro:per|ich ge#part|sagen-PASTP2 cm|cm on|oh cm|cm pro:per|ich v|haben-KONJ&13s adv|auch adv|gerne adjm|ein&det&m&sg&acc-en n|Zug&m&sg&acc . *MOT: und dann hat Nicki gesagt +"/. %mor: conj|und adv|dann v|haben-PRES&3s n:prop|Nicki ge#part|sagen-PASTP2 +"/. 2 Schema: *MOT: d…	B	die Konstituente "dem Braunbär" kann nicht abgeleitet werden der [PRO]-Slot ist auf Formen des Verbs haben restringiert die Kriterien der Traceback Methode lassen eine Kombination des Hauptsatzes mit dem Nebensatz nicht zu		Merit
ich muss sie hier besser malen ich muss [REF][LOC][PRO] sie hier malen failed: [REF]-Slot failed (keine Type-Variation) (c) [ATT]-Slot wird nicht gefunden (d)	c), d)	*CHI: ich muss die hier festmachen . %mor: pro:per|ich mod|müssen-PRES&13s pro|die adv:loc|hier fest#vinf|machen-INF . *CHI: ich muss die da anziehen . %mor: pro:per|ich mod|müssen-PRES&13s pro|die adv:loc|da an#vinf|ziehen-INF .	C	[REF]-Slot kann nicht abgeleitet werden, da keine Type-Variation vorliegt		Merit
das soll glaube ich ein Vogel sein das soll ein [REF] sein (ein) Vogle failed: +glaube ich (add/insert not allowed)	b), f)	*MOT: das soll ein B@l sein . %mor: pro|das mod|sollen-PRES&13s adjm|ein&det n:let|B vinf|sein&INF *MOT: das soll ein Apfel sein ? %mor: pro|das mod|sollen-PRES&13s adjm|ein&det&m&sg&nom n|Apfel&m&sg&nom vinf|sein&INF ? *MOT: die machen alle nur schöne Sachen hier , da sind sie im Zoo und hier , das soll glaub(e) ich der Wald sein .	B	Integration des übergeordneten Matrixsatzes "ich glabue" wird durch die Methode nicht berücksichtigt		Merit
das Pferd das muss jetzt bei dem Tierarzt sein [REF] [PRO] [adv] [LOC] [PRO] das muss jetzt beim Tierartz sein failed: das Pferd (add not allowed); kein teilspezifisches Schema; keine Typvariation	c), e), g)	*CHI: die will nur auf einer Giraffe reiten . %mor: pro|die mod|wollen-PRES&13s adv|nur prep|auf adjm|ein&det&f&sg&gen&dat-er n|Giraffe&f&sg&gen&dat vinf|reiten-INF . *CHI: der darf nur von ein Fenster gucken . %mor: pro|der mod|dürfen-PRES&13s adv|nur prep|von adjm|ein&det&n&sg&nom n|Fenster&n&sg&nom&acc vinf|gucken-INF .	C	Linksversetzung ins Vor-Vorfeld		Merit
wenn das alles kalt wird in der Jacke wenn das [ATT] [PRO] kalt wird in der [REF] Jacke failed: alles (add not allowed) failed: in der Jacke (add not allowed)	d), g)	*MOT: auch wenn das komisch aussieht , das eine . %mor: adv|auch conj|wenn pro|das adj|komisch aus#v|sehen-PRES&3s cm|cm pro|das adjm|ein&det-e . *MOT: wenn das wach ist . %mor: conj|wenn pro|das adj|wach cop|sein&PRES&3s . *MOT: nee@o , wenn das grün ist . %mor: on|nee cm|cm conj|wenn pro|das adj|grün cop|sein&PRES&3s .	B	Rechtsversetzung ("in der Jacke" aus dem Mittelfeld in das Nachfeld verschoben)		Merit
und hänge die hier an den Haken hin [PRO] [REF] [LOC] [PRO] hänge die an den Haken hin +und (add) failed: hier	d), e)	*CHI: da sitzt die in der Box drin . %mor: adv:loc|da v|sitzen-PRES&3s pro|die prep|in det|der&f&sg&gen&dat n|Box&f&sg&gen&dat vpfx|drin . *CHI: ich bau(e) das von der Seilbahn ab . %mor: pro:per|ich v|bauen-PRES&1s pro|das prep|von det|der&f&sg&gen&dat n|Seilbahn&f&sg&gen&dat vpfx|ab .	B, C			Merit
die geht mal da raus aus dem Stall [REF] [PRO] [adv] [LOC][PRO] die geht mal da raus da raus aus dem [REF] Stall failed: kein teilspezfisches Schema; Kombination der Konstruktionen über add nicht erlaubt	e), f)	*MOT: das kommt jetzt hier rein . %mor: pro|das v|kommen-PRES&3s adv|jetzt adv:loc|hier vpfx|rein . *MOT: guck mal , die gehören doch hier rein . %mor: vimp|gucken&IMP&2s adv|mal cm|cm pro|die v|gehören-PRES&13p adv|doch adv:loc|hier vpfx|rein .	B	"aus dem Stall" wäre Adverbiale		Merit
damit Giraffe hier drin stehen kann [CONJ] [REF] [PRO] kann damit Giraffe wandern failed: hier drin (add not allowed)	b), d)	*CHI: xxx hier oben und die wandern kann . %mor: adv:loc|hier adv:loc|oben conj|und pro|die v|wandern-PRES&13p mod|können-PRES&13s .	C	"hier drin" liegt mehrfach als Chunk im Korpus vor		Merit
ja die können hier jetzt wieder reingehen [REF] [PRO] [LOC] [adv] [PRO] die können [LOC] hier wieder [PRO] reingehen ja (add) failed: jetzt (add not allowed); keine Typvariation zur Ableitung des [LOC]-Slots; kein teilspezifisches Schema	c), d), e)	1. Schema: *CHI: der muss da erst warten . %mor: pro|der mod|müssen-PRES&13s adv:loc|da adv|erst vinf|warten-INF . *MOT: die könnte da auch sitzen . %mor: pro|die mod|können-KONJ&13s adv:loc|da adv|auch vinf|sitzen-INF 2. Schema: *CHI: die kenn [: können] da auch mit . %mor: pro|die mod|können-PRES&13p adv:loc|da adv|auch vpfx|mit . *CHI: die können xxx auf dem Pferd reiten . %mor: pro|die mod|kö…	B, C	das untergeordnete Schema ist im Korpus: jetzt wieder [PRO]		Merit
auf so ein Ding habe ich mich gesetzt auf [REF] -so ein Ding- habe ich mich [PRO) gesetzt failed: Kombination der Konstruktion mit add ist nicht erlaubt; verschobene Informationsstruktur (g)	f), g)	1. Schema: *MOT: auf ein Tuch ? %mor: prep|auf adjm|ein&det&n&sg&nom&acc n|Tuch&n&sg&nom&acc ? *CHI: nicht auf ein Hund . %mor: adv|nicht prep|auf adjm|ein&det&m&sg&nom n|Hund&m&sg&nom . 2. Schema: *CHI: auf wen hab(e) ich mich gesetzt ? %mor: prep|auf pro:int|wen aux|haben-PRES&1s pro:per|ich pro:per|mich ge#part|setzen-PASTP2 ? *CHI: und dann hab(e) ich mich wehgetan . %mor: conj|und adv|dann a…	B, C			Merit
das ist hier doch nicht warm [REF] ist [LOC] [ATT] das hier nicht warm failed: doch (add not allowed); keine Typvariation im [LOC]-Slot	c), d)	*CHI: dann das ist da kaputt [x 2] . %mor: adv|dann pro|das cop|sein&PRES&3s adv:loc|da adj|kaputt . *CHI: die Fiene_(Biene)@f ist da besser . %mor: det|die n:prop|Fiene_Biene cop|sein&PRES&3s adv:loc|da adj|gut-cp .	C			Merit
wir haben noch hier ein Schaf [REF] [PRO] [adv] [LOC] [REF] wir haben noch hier ein Schaf failed: keine Typvariation im [LOC]-Slot; kein teilspezifisches Schema	c), e)	*MOT: du hast doch da zwei Torten . %mor: pro:per|du v|haben-PRES&2s adv|doch adv:loc|da adj|zwei&num:card n|Torte&f-pl . *CHI: ich mag [: male] mal da ein Pflaster drauf . %mor: pro:per|ich v|malen-PRES&1s adv|mal adv:loc|da adjm|ein&det&n&sg&nom n|Pflaster&n&sg&nom&acc vpfx|drauf .	B, C			Merit
und zwei Leute die gehen jetzt alle raus die [PRO] jetzt [PRO] gehen raus und [REF] zwei Leute failed: die Kombination der beiden Konstruktionen mit add ist nicht erlaubt; kein zusätzlicher Slot, in den "alle" eingesetzt werden kann	d), f)	*CHI: die kommt jetzt raus . %mor: pro|die v|kommen-PRES&3s adv|jetzt vpfx|raus . *CHI: tiptaptiptaptiptap@o die gucken jetzt zu . %mor: on|tiptaptiptaptiptap pro|die v|gucken-PRES&13p adv|jetzt vpfx|zu .	C			Merit
wo die Kuh ganz hinten weit steht wo [REF] [adv] [PRO] -die Kuh- gerade steht failed: ganz hinten	b), d)	*CHI: hier hinten , wo ich gerade stehe , wo ich gerade hingeblieben sind . %mor: adv:loc|hier adv:loc|hinten cm|cm pro:int|wo pro:per|ich adv|gerade v|stehen-PRES&1s cm|cm pro:int|wo pro:per|ich adv|gerade hin#ge#part|bleiben-PASTP1 aux|sein&PRES&13p .	C			Merit
und warum nicht vorher drauf geritten [pro:int] [adv] [PRO] -warum nicht- geritten +und (add) nicht [adv] [PRO] vorher geritten failed: vorher drauf (add not allowed); kein teilspezifisches Schema, Kombination der beiden Konstruktionen über add nicht erlaubt	d), e), f)	1. Schema: *MOT: was denn abgemalt ? %mor: pro:int|was adv|denn ab#ge#part|malen-PASTP2 ? *CHI: wann genau &=vocalizes gestürzt . %mor: pro:int|wann adv|genau ge#part|stürzen-PASTP2 . 2. Schema: *CHI: da , nich(t) [/] nich(t) mehr worfen . %mor: adv:loc|da cm|cm adv|nicht adv|mehr part|werfen-PASTP1 . *MOT: Merit , ich glaube du hast heute noch gar nicht genug getrunken %mor: n:prop|Merit cm|cm p…	B, C			Merit
